# Supplementary material for: A Recommendation for Revised Dose Calibrator Measurement Procedures for 89Zr and 124I
Source: PLoS One. 2014 Sep 9;9(9):e106868. doi: 10.1371/journal.pone.0106868 (PMC4159273; doi:10.1371/journal.pone.0106868)
Supplement: Table S2 — I-124 Bracketed dose calibrator measurements. (XLSX) [file pone.0106868.s002.xlsx]

## Sheet: Sheet1
Reference Time			07:00:00			4.176
		Dose 1													Dose 2
		Small Volume in 5 mL Syringe in Copper													~1 mL and ~8mL in Wilex Bottle in Copper
cal #	507.097	433	463	493	523	553	570						cal #	499.916	433	463	493	523	553	570
time		07:19:00	07:19:24	07:19:48	07:20:12	07:20:36	07:21:00						time		07:52:12	07:52:24	07:52:00	07:52:36	07:52:48	07:53:00
mCi		1.16	1.1	1.04	0.989	0.941	0.917						mCi		0.398	0.375	0.357	0.338	0.323	0.314
mCi @ ref	1.01871	1.16254	1.10246	1.04238	0.991305	0.943237	0.919222	-0.0976603					mCi @ ref	0.354049	0.400402	0.377272	0.359146	0.340056	0.324972	0.315924	-0.107682
	1018.71	1162.54	1102.46	1042.38	991.305	943.237	919.222
		Small Volume in 5 mL Syringe Alone													~1 mL and ~8mL in Wilex Bottle Alone
cal #	748.864	670	700	730	760	790	570						cal #	615.227	545	575	605	635	665	570
time		07:23:12	07:23:24	07:23:00	07:23:36	07:23:48	07:24:00						time		07:54:24	07:54:48	07:54:00	07:55:12	07:55:36	07:56:00
mCi		1.12	1.08	1.04	1.001	0.967	1.3						mCi		0.39	0.373	0.357	0.342	0.328	0.376
mCi @ ref	1.01871	1.123	1.08292	1.04276	1.00373	0.969656	1.3036	0.279659					mCi @ ref	0.354049	0.392453	0.375364	0.359229	0.344183	0.330109	0.378435	0.0688775
	1018.71	1123	1082.92	1042.76	1003.73	969.656	1303.6
		residual in copper		493	07:30:00	0.0271									residual in copper		493	08:05:00	0.05512
					mCi @ ref	0.0271939												mCi @ ref	0.0555345
		3mL in 5mL Syringe in Copper													10mL in Liquid Scintillation Vial in Copper
cal #	493.521	433	463	493	523	553	570						cal #	495.211	433	463	493	523	553	570
time		07:31:24	07:31:48	07:31:00	07:32:12	07:32:36	07:33:00						time		08:07:24	08:07:48	08:07:00	08:08:12	08:08:36	08:09:00
mCi		1.1	1.04	0.991	0.941	0.896	0.872						mCi		0.333	0.315	0.298	0.283	0.27	0.263
mCi @ ref	0.992133	1.10399	1.04382	0.994547	0.944499	0.899373	0.875323	-0.117736					mCi @ ref	0.299303	0.335597	0.317471	0.30031	0.285233	0.272143	0.2651	-0.114274
	992.133	1103.99	1043.82	994.547	944.499	899.373	875.323
		3mL in 5mL Syringe Alone													10mL in Liquid Scintillation Vial Alone
cal #	787.849	724	754	784	814	844	570						cal #	667.233	603	633	663	693	723	570
time		07:36:24	07:36:48	07:36:00	07:37:12	07:37:36	07:38:00						time	08:07:00	08:10:24	08:10:48	08:10:00	08:11:12	08:11:36	08:12:00
mCi		1.06	1.03	0.991	0.957	0.925	1.32						mCi	0.297	0.325	0.312	0.298	0.287	0.276	0.342
mCi @ ref	0.992133	1.06446	1.03438	0.995121	0.961112	0.929018	1.32579	0.336307					mCi @ ref	0.299303	0.327648	0.314557	0.300414	0.289365	0.278287	0.34485	0.152179
	992.133	1064.46	1034.38	995.121	961.112	929.018	1325.79
		residual in copper		493	07:41:00	0.0032
					mCi @ ref	0.00321516
		10mL in Liquid Scintillation Vial in Copper
cal #	494.375	433	463	493	523	553	570
time		07:43:12	07:43:24	07:43:00	07:43:36	07:43:48	07:44:00
mCi		1.1	1.04	0.987	0.937	0.894	0.869
mCi @ ref	0.988926	1.10549	1.04522	0.991904	0.941721	0.898525	0.873419	-0.116801
	988.926	1105.49	1045.22	991.904	941.721	898.525	873.419
		10mL in Liquid Scintillation Vial Alone
cal #	664.483	602	632	662	692	722	570			992	200
time	07:43:00	07:47:24	07:47:48	07:47:00	07:48:12	07:48:36	07:49:00			992	1000
mCi	0.9738	1.08	1.03	0.987	0.948	0.913	1.13
mCi @ ref	0.988926	1.08592	1.03569	0.992362	0.953282	0.918129	1.1364	0.149126
	988.926	1085.92	1035.69	992.362	953.282	918.129	1136.4
		residual in copper		498	10:03:00	0.044
					mCi @ ref	0.044938
in phantom @ ref		0.988926
time	22:23:10	DSTE centered
mCi	0.80166						0.787881
mCi @ ref	0.891669	0.975141	-0.0139392
time	22:39:48	DSTE off center
mCi	0.787881
mCi @ ref	0.878024	0.960219	-0.029029
time	22:47:43	D690a centered
mCi	0.9509
mCi @ ref	1.06066	0.0725394
time	23:05:17	D690a off center
mCi	0.8808
mCi @ ref	0.984462	-0.00451413
21:12:54	1812.21	17:33:00	1879.71	0.0508029	286.528	313.351	0.00432994
22:20:19	1803.1	17:33:00	1891.34	0.0511173	288.302	315.291	0.0105471
