# Supplementary material for: A Recommendation for Revised Dose Calibrator Measurement Procedures for 89Zr and 124I
Source: PLoS One. 2014 Sep 9;9(9):e106868. doi: 10.1371/journal.pone.0106868 (PMC4159273; doi:10.1371/journal.pone.0106868)
Supplement: Table S3 — HPGe spectra and PET measurements. (XLSX) [file pone.0106868.s003.xlsx]

## Sheet: i-124_20130430_tbd
ref time	12:02:00																v1			v2			v3										v1			v2			v3
																bkg	r1	r2	r3	r1	r2	r3	r1	r2	r3	bkg	i124	bkg	zr89	bkg	zr89		r1-bkg	r2-bkg	r3-bkg	r1-bkg	r2-bkg	r3-bkg	r1-bkg	r2-bkg	r3-bkg	i124-bkg		zr89-bkg	zr89-bkg
DSTE																300	300	300	300	300	300	300	300	300	300	300	300	180	180	300	300		0	0	0	0	0	0	0	0	0	0		0	0	0
Time	tpr	s1	1/std(act)	%err	Time	tpr	s2	1/std(act)	%err	Time	tpr	s3	1/std(act)	%err		300	311	309	308	310	309	308	310	309	308	300	305	180	210	300	311		11	9	8	10	9	8	10	9	8	5		30	11	28.371
12:02:00	0	376	0.0515711	0.000798509	12:03:00	0.0166667	379	0.0513665	0.000233406	12:04:00	0.0333333	377.5	0.0514685	0.00161932		0	0	0	0	0	0	0	0	0	0	0	0	0	0	0	0		0	0	0	0	0	0	0	0	0	0		0	0	0
13:49:00	1.78333	190.2	0.0725095	0.00499727	13:50:00	1.8	191.3	0.0723007	0.00818806	13:51:00	1.81667	190.9	0.0723764	0.00448773		0	0	0	0	0	0	0	0	0	0	0	0	0	0	0	0		0	0	0	0	0	0	0	0	0	0		0	0	0
16:50:00	4.8	61.2	0.127827	0.00408456	16:52:00	4.83333	61.9	0.127103	0.0128676	16:53:00	4.85	61.7	0.127309	0.015485		0	0	0	0	0	0	0	0	0	0	0	0	0	0	0	0		0	0	0	0	0	0	0	0	0	0		0	0	0
		375.7		0.00329345			381.49		0.00709636			381.68		0.00719736		0	0	0	0	0	0	0	0	0	0	0	0	0	0	0	0		0	0	0	0	0	0	0	0	0	0		0	0	0
																0	1	0	0	0	0	0	0	0	0	0	0	0	0	0	0		1	0	0	0	0	0	0	0	0	0		0	0	0
P2																0	0	0	0	0	0	0	0	0	0	0	0	0	0	0	0		0	0	0	0	0	0	0	0	0	0		0	0	0
Time	tpr	s1	1/std(act)	%err	Time	tpr	s2	1/std(act)	%err	Time	tpr	s3	1/std(act)	%err		0	0	0	0	0	0	0	0	0	0	0	1	0	0	0	0		0	0	0	0	0	0	0	0	0	1		0	0	0
12:32:00	0.5	307.8	0.0569988	0.00199959	12:33:00	0.516667	310	0.0567962	0.0016597	12:34:00	0.533333	309.5	0.056842	0.00241138		0	0	0	0	0	0	0	0	0	0	0	1	0	0	0	0		0	0	0	0	0	0	0	0	0	1		0	0	0
13:54:00	1.86667	181	0.0743294	0.0110639	13:55:00	1.88333	182	0.0741249	0.0129922	13:57:00	1.91667	181.5	0.074227	0.00712346		0	0	0	0	1	0	0	0	0	0	0	0	0	0	0	0		0	0	0	1	0	0	0	0	0	0		0	0	0
16:34:00	4.53333	67	0.122169	0.00548498	16:36:00	4.56667	67	0.122169	0.004333	16:37:00	4.58333	67	0.122169	0.00671042		0	0	2	0	0	1	0	0	0	0	0	0	0	1	0	0		0	2	0	0	1	0	0	0	0	0		1	0	0
		371.26		0.00618284			376.41		0.00632828			377.9		0.00541509		0	128	84	74	153	126	68	114	86	53	0	2	0	0	0	1		128	84	74	153	126	68	114	86	53	2		0	1	2.57918
																59	1049	943	870	1043	999	870	1005	937	833	71	542	42.6	9	66	505		990	884	811	984	940	811	946	878	774	471		-33.6	439	1132.26
P4																215	1110	949	866	1003	971	876	1028	883	836	185	669	111	933	216	1038		895	734	651	788	756	661	813	668	621	484		822	822	2120.08
Time	tpr	s1	1/std(act)	%err	Time	tpr	s2	1/std(act)	%err	Time	tpr	s3	1/std(act)	%err		142	919	842	812	928	885	784	902	859	729	153	567	91.8	2097	113	979		777	700	670	786	743	642	760	717	587	414		2005.2	866	2233.57
12:36:00	0.566667	296	0.0581238	0.000755216	12:37:00	0.583333	299.5	0.0577832	0.0012401	12:38:00	0.6	298	0.0579284	0.000231193		108	937	799	685	865	814	714	878	809	705	101	460	60.6	1991	86	835		829	691	577	757	706	606	770	701	597	359		1930.4	749	1931.8
14:02:00	2	171.5	0.0763604	0.00343577	14:03:00	2.01667	173.5	0.075919	0.00160619	14:04:00	2.03333	173	0.0760286	0.00048061		105	872	787	660	834	826	742	808	740	690	94	439	56.4	1928	94	760		767	682	555	729	721	637	703	635	585	345		1871.6	666	1717.73
16:44:00	4.7	63	0.125988	0.0183053	16:45:00	4.71667	63	0.125988	0.00841485	16:46:00	4.73333	63	0.125988	0.0124695		94	868	702	658	842	798	681	791	755	632	86	436	51.6	1810	83	780		774	608	564	748	704	587	697	661	538	350		1758.4	697	1797.69
		367.17		0.00749876			373.12		0.00375372			373.98		0.00439377		90	747	694	661	768	751	632	752	700	633	90	374	54	1776	94	792		657	604	571	678	661	542	662	610	543	284		1722	698	1800.27
																90	722	672	608	747	729	618	741	663	643	97	385	58.2	1693	76	688		632	582	518	657	639	528	651	573	553	288		1634.8	612	1578.46
																86	716	634	581	762	694	595	746	649	621	92	340	55.2	1752	100	694		630	548	495	676	608	509	660	563	535	248		1696.8	594	1532.03
		371.377					377.007					377.853				85	725	720	577	724	634	584	670	636	579	95	355	57	1667	76	680		640	635	492	639	549	499	585	551	494	260		1610	604	1557.82
		4.2662					4.21678					3.85021				87	736	632	568	708	644	544	695	580	523	59	352	35.4	1523	85	684		649	545	481	621	557	457	608	493	436	293		1487.6	599	1544.93
		0.0114875					0.0111849					0.0101897				71	664	628	552	662	651	554	682	568	565	68	347	40.8	1521	83	650		593	557	481	591	580	483	611	497	494	279		1480.2	567	1462.39
	16:56:00	0.5				16:58:00	0.05				17:00:00	0.08				82	659	584	564	660	625	545	647	573	506	63	306	37.8	1549	75	623		577	502	482	578	543	463	565	491	424	243		1511.2	548	1413.39
		368.176					376.682					377.328				54	670	621	547	639	614	540	673	559	527	74	307	44.4	1427	71	609		616	567	493	585	560	486	619	505	473	233		1382.6	538	1387.6
																64	626	544	520	641	611	526	594	534	532	64	310	38.4	1359	60	569		562	480	456	577	547	462	530	470	468	246		1320.6	509	1312.8
																67	646	580	506	624	554	461	627	535	458	72	327	43.2	1458	75	591		579	513	439	557	487	394	560	468	391	255		1414.8	516	1330.86
DSTE																55	604	582	529	577	580	495	581	520	435	81	302	48.6	1343	60	593		549	527	474	522	525	440	526	465	380	221		1294.4	533	1374.7
Time	tpr	v1	1/std(act)	%err	Time	tpr	v2	1/std(act)	%err	Time	tpr	v3	1/std(act)	%err		69	638	514	476	609	547	478	562	534	438	78	248	46.8	1380	63	551		569	445	407	540	478	409	493	465	369	170		1333.2	488	1258.64
17:02:00	5	55.1	0.134718	-0.00489843	17:03:00	5.01667	55.9	0.13375	-0.00699867	17:04:00	5.03333	55.7	0.13399	-0.00598689		55	609	555	488	578	504	485	531	564	439	65	280	39	1304	62	528		554	500	433	523	449	430	476	509	384	215		1265	466	1201.9
																65	608	518	462	535	510	448	565	488	428	61	264	36.6	1233	62	509		543	453	397	470	445	383	500	423	363	203		1196.4	447	1152.89
																54	614	552	494	564	522	419	548	498	493	48	282	28.8	1299	46	588		560	498	440	510	468	365	494	444	439	234		1270.2	542	1397.91
																50	556	484	422	595	506	452	521	470	411	56	289	33.6	1281	47	513		506	434	372	545	456	402	471	420	361	233		1247.4	466	1201.9
																54	608	508	423	541	496	436	549	469	423	56	275	33.6	1272	55	526		554	454	369	487	442	382	495	415	369	219		1238.4	471	1214.79
																50	572	491	454	563	522	466	514	499	446	60	273	36	1247	54	486		522	441	404	513	472	416	464	449	396	213		1211	432	1114.21
																57	519	504	434	542	523	432	510	474	406	59	264	35.4	1325	49	462		462	447	377	485	466	375	453	417	349	205		1289.6	413	1065.2
																41	587	492	433	504	498	401	507	470	445	56	241	33.6	1168	65	511		546	451	392	463	457	360	466	429	404	185		1134.4	446	1150.31
																63	538	476	444	495	475	415	541	461	407	60	273	36	1179	55	480		475	413	381	432	412	352	478	398	344	213		1143	425	1096.15
																43	531	462	436	558	517	398	516	458	363	58	244	34.8	1185	50	465		488	419	393	515	474	355	473	415	320	186		1150.2	415	1070.36
																42	532	477	411	479	459	421	518	428	435	48	224	28.8	1121	65	454		490	435	369	437	417	379	476	386	393	176		1092.2	389	1003.3
																48	494	471	393	499	481	411	485	410	378	39	230	23.4	1145	52	500		446	423	345	451	433	363	437	362	330	191		1121.6	448	1155.47
																60	480	436	395	499	448	406	454	460	383	38	209	22.8	1104	53	469		420	376	335	439	388	346	394	400	323	171		1081.2	416	1072.94
																49	503	457	403	507	464	429	459	420	388	49	245	29.4	1029	50	442		454	408	354	458	415	380	410	371	339	196		999.6	392	1011.04
																62	520	434	398	484	439	391	450	410	373	61	211	36.6	1139	54	415		458	372	336	422	377	329	388	348	311	150		1102.4	361	931.083
																42	482	426	396	456	458	367	450	453	406	36	255	21.6	1108	47	424		440	384	354	414	416	325	408	411	364	219		1086.4	377	972.35
																37	478	476	383	452	412	387	455	398	370	49	225	29.4	1094	46	422		441	439	346	415	375	350	418	361	333	176		1064.6	376	969.771
																44	481	408	400	484	469	388	405	456	383	41	227	24.6	1082	45	436		437	364	356	440	425	344	361	412	339	186		1057.4	391	1008.46
																43	474	454	364	497	456	409	429	412	376	49	235	29.4	1096	46	409		431	411	321	454	413	366	386	369	333	186		1066.6	363	936.242
																40	465	419	366	485	434	339	491	437	384	50	215	30	1058	43	463		425	379	326	445	394	299	451	397	344	165		1028	420	1083.25
																47	470	397	336	462	407	389	421	363	354	48	208	28.8	1024	47	421		423	350	289	415	360	342	374	316	307	160		995.2	374	964.613
																42	466	394	381	456	394	362	437	395	345	45	241	27	1047	44	412		424	352	339	414	352	320	395	353	303	196		1020	368	949.138
																42	487	411	340	468	411	338	425	415	347	43	197	25.8	1003	49	423		445	369	298	426	369	296	383	373	305	154		977.2	374	964.613
																45	447	437	357	457	417	387	405	396	345	46	221	27.6	1039	48	434		402	392	312	412	372	342	360	351	300	175		1011.4	386	995.563
																44	478	418	367	486	398	375	472	388	323	36	208	21.6	997	41	404		434	374	323	442	354	331	428	344	279	172		975.4	363	936.242
																44	464	426	347	478	392	328	413	377	358	51	193	30.6	996	40	406		420	382	303	434	348	284	369	333	314	142		965.4	366	943.979
																39	483	395	367	485	397	353	453	342	331	50	229	30	966	43	434		444	356	328	446	358	314	414	303	292	179		936	391	1008.46
																48	470	390	351	466	421	388	393	405	318	44	210	26.4	962	50	428		422	342	303	418	373	340	345	357	270	166		935.6	378	974.929
																36	455	417	385	435	399	364	423	380	343	47	218	28.2	957	39	400		419	381	349	399	363	328	387	344	307	171		928.8	361	931.083
																42	463	374	351	450	419	370	442	376	332	40	209	24	900	40	375		421	332	309	408	377	328	400	334	290	169		876	335	864.025
																39	470	386	340	428	381	329	397	371	348	49	226	29.4	971	45	398		431	347	301	389	342	290	358	332	309	177		941.6	353	910.45
																35	454	365	335	434	386	365	392	384	335	37	223	22.2	961	35	393		419	330	300	399	351	330	357	349	300	186		938.8	358	923.346
																34	447	377	343	462	399	350	431	396	328	45	184	27	984	32	436		413	343	309	428	365	316	397	362	294	139		957	404	1041.99
																43	440	382	321	418	394	361	383	365	347	48	198	28.8	967	36	369		397	339	278	375	351	318	340	322	304	150		938.2	333	858.866
																36	423	388	385	432	370	305	442	350	347	38	195	22.8	947	36	401		387	352	349	396	334	269	406	314	311	157		924.2	365	941.4
																38	420	407	354	437	407	354	415	374	343	38	209	22.8	944	39	339		382	369	316	399	369	316	377	336	305	171		921.2	300	773.754
																35	449	395	349	419	364	321	396	358	340	51	194	30.6	961	29	389		414	360	314	384	329	286	361	323	305	143		930.4	360	928.504
																34	436	379	364	441	421	344	429	372	296	33	199	19.8	934	41	353		402	345	330	407	387	310	395	338	262	166		914.2	312	804.704
																41	424	385	344	417	366	332	417	423	347	45	204	27	939	52	356		383	344	303	376	325	291	376	382	306	159		912	304	784.07
																35	422	369	328	439	389	303	395	387	307	48	208	28.8	939	40	342		387	334	293	404	354	268	360	352	272	160		910.2	302	778.912
																33	455	340	355	423	359	321	391	366	332	34	201	20.4	939	28	371		422	307	322	390	326	288	358	333	299	167		918.6	343	884.658
																65	400	387	329	427	371	312	390	339	323	26	223	15.6	899	41	359		335	322	264	362	306	247	325	274	258	197		883.4	318	820.179
																47	394	361	372	411	375	310	399	348	331	35	184	21	979	30	342		347	314	325	364	328	263	352	301	284	149		958	312	804.704
																39	398	389	338	401	396	310	384	342	314	39	187	23.4	897	32	349		359	350	299	362	357	271	345	303	275	148		873.6	317	817.6
																32	439	376	327	387	417	332	377	388	301	34	181	20.4	931	32	331		407	344	295	355	385	300	345	356	269	147		910.6	299	771.174
																36	378	355	333	401	382	342	371	337	326	38	199	22.8	859	47	370		342	319	297	365	346	306	335	301	290	161		836.2	323	833.075
																41	394	390	327	367	366	324	376	335	325	46	171	27.6	880	31	393		353	349	286	326	325	283	335	294	284	125		852.4	362	933.663
																34	385	354	328	402	390	329	411	331	302	27	177	16.2	871	41	371		351	320	294	368	356	295	377	297	268	150		854.8	330	851.129
																39	390	372	342	405	363	313	416	362	298	43	182	25.8	902	44	371		351	333	303	366	324	274	377	323	259	139		876.2	327	843.391
																32	389	354	272	440	395	313	378	337	301	21	169	12.6	839	48	361		357	322	240	408	363	281	346	305	269	148		826.4	313	807.283
																35	390	340	317	399	362	331	371	361	334	35	206	21	902	24	341		355	305	282	364	327	296	336	326	299	171		881	317	817.6
																27	392	354	308	394	336	300	359	317	290	39	188	23.4	829	38	369		365	327	281	367	309	273	332	290	263	149		805.6	331	853.708
																33	390	361	322	372	372	321	397	346	301	24	200	14.4	900	38	336		357	328	289	339	339	288	364	313	268	176		885.6	298	768.595
																35	418	385	288	389	360	303	358	348	316	46	175	27.6	827	29	343		383	350	253	354	325	268	323	313	281	129		799.4	314	809.862
																41	435	376	352	375	349	328	371	352	296	32	172	19.2	850	32	338		394	335	311	334	308	287	330	311	255	140		830.8	306	789.229
																23	413	356	276	379	347	285	341	357	278	34	178	20.4	828	33	319		390	333	253	356	324	262	318	334	255	144		807.6	286	737.645
																31	376	353	326	368	335	297	379	316	289	41	170	24.6	859	28	361		345	322	295	337	304	266	348	285	258	129		834.4	333	858.866
																31	374	363	294	389	360	307	369	318	311	23	201	13.8	883	34	343		343	332	263	358	329	276	338	287	280	178		869.2	309	796.966
																35	361	349	312	399	316	291	336	293	304	32	159	19.2	862	35	343		326	314	277	364	281	256	301	258	269	127		842.8	308	794.387
																37	372	382	287	374	323	319	328	316	297	33	171	19.8	836	35	358		335	345	250	337	286	282	291	279	260	138		816.2	323	833.075
																34	407	342	307	359	324	280	390	320	306	35	187	21	791	35	358		373	308	273	325	290	246	356	286	272	152		770	323	833.075
																26	360	329	316	386	353	304	336	337	281	47	179	28.2	862	31	368		334	303	290	360	327	278	310	311	255	132		833.8	337	869.183
																36	410	346	323	395	371	305	350	334	306	21	178	12.6	788	37	353		374	310	287	359	335	269	314	298	270	157		775.4	316	815.02
																34	343	341	307	363	349	300	346	340	264	39	173	23.4	912	35	319		309	307	273	329	315	266	312	306	230	134		888.6	284	732.487
																33	340	361	293	376	325	321	356	338	280	30	166	18	896	36	342		307	328	260	343	292	288	323	305	247	136		878	306	789.229
																33	369	326	309	336	336	308	356	319	297	29	178	17.4	818	41	323		336	293	276	303	303	275	323	286	264	149		800.6	282	727.328
																33	419	316	293	365	341	289	338	292	294	29	164	17.4	845	28	304		386	283	260	332	308	256	305	259	261	135		827.6	276	711.853
																36	370	350	282	346	318	294	349	322	280	29	189	17.4	797	33	347		334	314	246	310	282	258	313	286	244	160		779.6	314	809.862
																24	406	304	291	364	336	269	350	320	261	38	179	22.8	804	26	306		382	280	267	340	312	245	326	296	237	141		781.2	280	722.17
																35	369	328	289	383	321	289	361	324	304	31	186	18.6	852	36	338		334	293	254	348	286	254	326	289	269	155		833.4	302	778.912
																33	379	310	295	355	376	313	352	289	289	33	162	19.8	783	26	327		346	277	262	322	343	280	319	256	256	129		763.2	301	776.333
																31	349	333	309	361	340	279	334	302	270	26	153	15.6	810	25	329		318	302	278	330	309	248	303	271	239	127		794.4	304	784.07
																43	406	330	286	357	305	267	332	334	265	36	161	21.6	817	24	319		363	287	243	314	262	224	289	291	222	125		795.4	295	760.858
																38	391	328	321	366	294	307	303	334	313	32	197	19.2	770	36	335		353	290	283	328	256	269	265	296	275	165		750.8	299	771.174
																37	395	335	314	380	294	278	356	290	290	38	150	22.8	779	34	332		358	298	277	343	257	241	319	253	253	112		756.2	298	768.595
																40	348	353	307	351	347	280	362	271	260	41	157	24.6	818	29	330		308	313	267	311	307	240	322	231	220	116		793.4	301	776.333
																33	393	327	299	359	366	278	317	316	309	32	173	19.2	774	30	291		360	294	266	326	333	245	284	283	276	141		754.8	261	673.166
																30	379	307	282	366	354	295	337	320	285	35	182	21	813	26	331		349	277	252	336	324	265	307	290	255	147		792	305	786.649
																24	337	307	280	353	354	300	324	306	277	30	161	18	807	41	317		313	283	256	329	330	276	300	282	253	131		789	276	711.853
																43	392	343	291	365	322	276	337	291	303	20	163	12	797	40	325		349	300	248	322	279	233	294	248	260	143		785	285	735.066
																30	330	285	304	352	338	294	345	306	264	27	168	16.2	783	33	325		300	255	274	322	308	264	315	276	234	141		766.8	292	753.12
																28	363	312	257	379	340	282	296	334	260	24	201	14.4	838	33	317		335	284	229	351	312	254	268	306	232	177		823.6	284	732.487
																37	364	350	327	344	332	278	310	293	293	26	158	15.6	774	23	307		327	313	290	307	295	241	273	256	256	132		758.4	284	732.487
																29	367	356	277	348	309	279	342	296	269	26	150	15.6	763	31	302		338	327	248	319	280	250	313	267	240	124		747.4	271	698.957
																26	385	340	289	332	337	281	361	306	254	27	157	16.2	819	31	330		359	314	263	306	311	255	335	280	228	130		802.8	299	771.174
																32	364	320	293	398	311	251	329	278	260	40	146	24	738	22	325		332	288	261	366	279	219	297	246	228	106		714	303	781.491
																22	322	292	256	370	354	291	319	310	269	39	174	23.4	793	30	315		300	270	234	348	332	269	297	288	247	135		769.6	285	735.066
																30	387	328	308	360	338	225	360	288	258	25	161	15	772	29	293		357	298	278	330	308	195	330	258	228	136		757	264	680.903
																18	372	362	284	337	306	240	370	303	274	29	165	17.4	764	28	348		354	344	266	319	288	222	352	285	256	136		746.6	320	825.337
																22	360	327	297	348	336	260	323	328	265	33	158	19.8	773	42	301		338	305	275	326	314	238	301	306	243	125		753.2	259	668.007
																31	358	344	284	315	309	238	321	329	276	38	165	22.8	796	28	274		327	313	253	284	278	207	290	298	245	127		773.2	246	634.478
																25	385	311	290	348	317	264	321	288	300	26	139	15.6	747	27	297		360	286	265	323	292	239	296	263	275	113		731.4	270	696.378
																35	396	315	275	339	329	272	320	307	271	26	167	15.6	791	23	258		361	280	240	304	294	237	285	272	236	141		775.4	235	606.107
																30	328	327	300	346	337	242	280	293	254	30	156	18	802	27	329		298	297	270	316	307	212	250	263	224	126		784	302	778.912
																29	359	319	258	337	303	273	359	279	247	29	148	17.4	799	23	306		330	290	229	308	274	244	330	250	218	119		781.6	283	729.907
																39	329	278	275	343	318	258	334	303	238	25	188	15	749	21	290		290	239	236	304	279	219	295	264	199	163		734	269	693.799
																36	348	350	269	373	334	258	315	279	255	31	141	18.6	794	26	311		312	314	233	337	298	222	279	243	219	110		775.4	285	735.066
																32	366	306	266	356	313	286	318	293	258	35	147	21	739	40	296		334	274	234	324	281	254	286	261	226	112		718	256	660.27
																31	369	312	270	340	327	275	342	262	273	24	147	14.4	782	28	305		338	281	239	309	296	244	311	231	242	123		767.6	277	714.432
																26	382	265	262	363	282	294	320	314	264	25	143	15	803	34	312		356	239	236	337	256	268	294	288	238	118		788	278	717.012
																25	338	314	281	335	330	254	359	302	250	25	140	15	757	27	294		313	289	256	310	305	229	334	277	225	115		742	267	688.641
																29	333	289	297	351	339	254	309	299	276	34	162	20.4	688	29	312		304	260	268	322	310	225	280	270	247	128		667.6	283	729.907
																25	317	306	286	366	311	277	329	281	292	34	164	20.4	713	30	290		292	281	261	341	286	252	304	256	267	130		692.6	260	670.586
																32	333	329	256	345	334	267	335	268	259	23	163	13.8	727	29	321		301	297	224	313	302	235	303	236	227	140		713.2	292	753.12
																29	356	337	276	351	296	259	303	299	247	29	127	17.4	773	28	293		327	308	247	322	267	230	274	270	218	98		755.6	265	683.482
																27	316	293	274	344	306	244	285	256	277	34	164	20.4	716	37	291		289	266	247	317	279	217	258	229	250	130		695.6	254	655.111
																20	340	340	287	332	284	266	307	301	235	22	158	13.2	743	22	326		320	320	267	312	264	246	287	281	215	136		729.8	304	784.07
																23	333	313	300	348	299	263	303	314	266	25	163	15	765	32	303		310	290	277	325	276	240	280	291	243	138		750	271	698.957
																34	342	309	247	338	321	305	329	283	280	30	150	18	712	27	307		308	275	213	304	287	271	295	249	246	120		694	280	722.17
																34	344	312	270	339	288	252	329	311	254	26	145	15.6	678	25	279		310	278	236	305	254	218	295	277	220	119		662.4	254	655.111
																29	330	282	266	302	310	290	342	277	259	24	141	14.4	713	28	275		301	253	237	273	281	261	313	248	230	117		698.6	247	637.057
																26	331	329	266	331	292	269	336	293	270	24	154	14.4	727	36	330		305	303	240	305	266	243	310	267	244	130		712.6	294	758.278
																29	308	279	258	328	296	268	329	286	252	28	170	16.8	724	24	282		279	250	229	299	267	239	300	257	223	142		707.2	258	665.428
																21	354	298	246	309	307	254	304	280	255	25	157	15	757	29	311		333	277	225	288	286	233	283	259	234	132		742	282	727.328
																19	341	314	274	317	326	279	310	301	251	30	192	18	723	26	279		322	295	255	298	307	260	291	282	232	162		705	253	652.532
																26	324	334	233	371	286	262	313	294	258	30	166	18	785	27	262		298	308	207	345	260	236	287	268	232	136		767	235	606.107
																31	346	321	290	328	315	255	328	285	257	25	141	15	737	19	261		315	290	259	297	284	224	297	254	226	116		722	242	624.161
																26	304	321	290	314	304	251	306	305	301	28	165	16.8	761	24	308		278	295	264	288	278	225	280	279	275	137		744.2	284	732.487
																26	314	319	276	344	295	266	330	282	267	28	164	16.8	679	24	262		288	293	250	318	269	240	304	256	241	136		662.2	238	613.844
																32	352	334	263	331	315	251	301	301	279	20	136	12	714	26	320		320	302	231	299	283	219	269	269	247	116		702	294	758.278
																32	334	305	267	312	290	292	315	291	261	25	141	15	696	23	271		302	273	235	280	258	260	283	259	229	116		681	248	639.636
																16	344	297	259	343	301	251	294	292	271	22	163	13.2	741	25	298		328	281	243	327	285	235	278	276	255	141		727.8	273	704.116
																23	356	312	269	342	323	228	285	277	247	32	140	19.2	720	30	303		333	289	246	319	300	205	262	254	224	108		700.8	273	704.116
																25	306	282	258	326	279	289	306	312	260	28	163	16.8	721	25	287		281	257	233	301	254	264	281	287	235	135		704.2	262	675.745
																28	322	291	254	322	280	245	300	295	269	24	164	14.4	701	26	267		294	263	226	294	252	217	272	267	241	140		686.6	241	621.582
																32	310	291	272	340	296	229	353	303	264	29	143	17.4	700	23	288		278	259	240	308	264	197	321	271	232	114		682.6	265	683.482
																28	353	299	243	324	276	237	298	233	254	28	161	16.8	755	28	274		325	271	215	296	248	209	270	205	226	133		738.2	246	634.478
																15	324	291	300	350	351	268	296	274	232	32	131	19.2	711	21	266		309	276	285	335	336	253	281	259	217	99		691.8	245	631.899
																29	343	268	248	351	253	275	318	277	278	21	140	12.6	722	25	278		314	239	219	322	224	246	289	248	249	119		709.4	253	652.532
																21	320	304	259	306	298	249	333	314	262	24	149	14.4	718	16	270		299	283	238	285	277	228	312	293	241	125		703.6	254	655.111
																28	308	281	266	311	283	301	338	239	224	26	134	15.6	677	23	271		280	253	238	283	255	273	310	211	196	108		661.4	248	639.636
																27	349	278	264	329	298	248	299	294	264	36	143	21.6	719	28	271		322	251	237	302	271	221	272	267	237	107		697.4	243	626.74
																24	314	300	264	340	294	258	296	273	231	11	138	6.6	722	21	282		290	276	240	316	270	234	272	249	207	127		715.4	261	673.166
																21	335	295	260	340	315	255	316	290	230	23	133	13.8	750	30	263		314	274	239	319	294	234	295	269	209	110		736.2	233	600.949
																22	328	305	227	307	283	244	310	222	239	24	144	14.4	724	28	287		306	283	205	285	261	222	288	200	217	120		709.6	259	668.007
																25	319	274	252	330	270	249	288	271	271	31	169	18.6	697	24	272		294	249	227	305	245	224	263	246	246	138		678.4	248	639.636
																21	310	309	268	347	278	275	311	301	271	16	148	9.6	693	29	256		289	288	247	326	257	254	290	280	250	132		683.4	227	585.473
																28	322	308	254	325	285	270	293	260	273	29	128	17.4	721	24	277		294	280	226	297	257	242	265	232	245	99		703.6	253	652.532
																20	326	296	256	286	266	245	288	258	240	24	153	14.4	720	26	250		306	276	236	266	246	225	268	238	220	129		705.6	224	577.736
																31	330	280	294	313	290	247	301	265	233	28	154	16.8	709	17	247		299	249	263	282	259	216	270	234	202	126		692.2	230	593.211
																27	333	277	261	305	280	280	307	294	231	24	150	14.4	709	24	298		306	250	234	278	253	253	280	267	204	126		694.6	274	706.695
																20	310	312	260	298	289	277	300	241	225	23	149	13.8	680	30	232		290	292	240	278	269	257	280	221	205	126		666.2	202	520.994
																28	318	271	247	317	302	257	325	284	241	26	162	15.6	644	27	266		290	243	219	289	274	229	297	256	213	136		628.4	239	616.424
																26	315	280	247	330	258	255	316	270	228	20	143	12	702	21	257		289	254	221	304	232	229	290	244	202	123		690	236	608.686
																32	333	288	220	303	285	228	334	280	259	29	111	17.4	669	24	279		301	256	188	271	253	196	302	248	227	82		651.6	255	657.69
																30	300	282	230	301	279	242	324	277	221	22	129	13.2	666	34	279		270	252	200	271	249	212	294	247	191	107		652.8	245	631.899
																19	339	300	266	309	292	246	277	258	228	28	125	16.8	671	23	281		320	281	247	290	273	227	258	239	209	97		654.2	258	665.428
																23	316	268	279	296	285	235	320	281	247	25	136	15	675	35	261		293	245	256	273	262	212	297	258	224	111		660	226	582.894
																27	305	297	258	342	263	260	289	272	237	31	130	18.6	681	21	271		278	270	231	315	236	233	262	245	210	99		662.4	250	644.795
																24	309	255	264	326	267	259	328	240	239	24	135	14.4	713	35	285		285	231	240	302	243	235	304	216	215	111		698.6	250	644.795
																18	320	282	234	267	279	229	307	268	213	18	123	10.8	679	24	259		302	264	216	249	261	211	289	250	195	105		668.2	235	606.107
																23	293	264	247	293	285	232	300	292	230	18	136	10.8	720	24	258		270	241	224	270	262	209	277	269	207	118		709.2	234	603.528
																23	310	244	255	344	243	259	342	217	268	24	183	14.4	722	21	255		287	221	232	321	220	236	319	194	245	159		707.6	234	603.528
																25	295	268	238	281	300	258	329	273	247	25	137	15	655	18	272		270	243	213	256	275	233	304	248	222	112		640	254	655.111
																37	333	284	274	280	260	272	281	252	231	23	124	13.8	694	19	258		296	247	237	243	223	235	244	215	194	101		680.2	239	616.424
																33	335	316	245	314	310	263	292	271	252	24	140	14.4	637	25	269		302	283	212	281	277	230	259	238	219	116		622.6	244	629.32
																23	312	279	235	333	301	217	313	261	277	26	137	15.6	649	27	264		289	256	212	310	278	194	290	238	254	111		633.4	237	611.265
																23	331	290	264	304	280	264	315	275	233	16	138	9.6	695	19	265		308	267	241	281	257	241	292	252	210	122		685.4	246	634.478
																20	332	286	252	284	273	226	300	275	229	15	133	9	696	23	256		312	266	232	264	253	206	280	255	209	118		687	233	600.949
																22	339	292	254	306	278	271	293	262	224	28	143	16.8	633	21	270		317	270	232	284	256	249	271	240	202	115		616.2	249	642.215
																27	345	270	255	317	293	247	282	252	249	20	118	12	678	36	290		318	243	228	290	266	220	255	225	222	98		666	254	655.111
																20	344	283	246	293	283	236	312	262	247	27	141	16.2	682	15	232		324	263	226	273	263	216	292	242	227	114		665.8	217	559.682
																22	303	290	229	321	276	256	338	250	220	20	130	12	628	24	243		281	268	207	299	254	234	316	228	198	110		616	219	564.84
																23	310	290	247	324	316	241	322	234	291	27	146	16.2	672	27	280		287	267	224	301	293	218	299	211	268	119		655.8	253	652.532
																21	301	290	272	308	311	255	300	280	228	23	146	13.8	657	22	256		280	269	251	287	290	234	279	259	207	123		643.2	234	603.528
																17	329	289	271	314	257	263	289	283	243	22	142	13.2	712	19	270		312	272	254	297	240	246	272	266	226	120		698.8	251	647.374
																21	348	294	244	309	269	248	310	245	235	16	125	9.6	640	20	254		327	273	223	288	248	227	289	224	214	109		630.4	234	603.528
																22	333	285	266	269	291	257	306	267	231	24	135	14.4	706	15	232		311	263	244	247	269	235	284	245	209	111		691.6	217	559.682
																23	285	237	261	342	268	247	290	277	247	28	159	16.8	637	23	259		262	214	238	319	245	224	267	254	224	131		620.2	236	608.686
																25	313	257	244	338	295	247	304	289	235	22	135	13.2	685	28	280		288	232	219	313	270	222	279	264	210	113		671.8	252	649.953
																23	307	293	231	306	254	254	293	263	215	22	149	13.2	674	14	261		284	270	208	283	231	231	270	240	192	127		660.8	247	637.057
																21	321	253	255	286	274	276	319	253	227	31	135	18.6	638	18	264		300	232	234	265	253	255	298	232	206	104		619.4	246	634.478
																24	320	264	256	310	271	263	274	252	238	22	138	13.2	697	20	251		296	240	232	286	247	239	250	228	214	116		683.8	231	595.79
																28	283	303	261	322	265	229	290	271	218	27	125	16.2	645	18	252		255	275	233	294	237	201	262	243	190	98		628.8	234	603.528
																25	285	286	270	304	276	252	312	271	246	17	122	10.2	706	19	252		260	261	245	279	251	227	287	246	221	105		695.8	233	600.949
																18	344	297	220	303	281	255	310	253	244	24	132	14.4	694	14	260		326	279	202	285	263	237	292	235	226	108		679.6	246	634.478
																30	303	291	234	288	264	266	260	261	227	29	160	17.4	646	15	272		273	261	204	258	234	236	230	231	197	131		628.6	257	662.849
																26	326	277	239	311	235	235	272	269	245	24	129	14.4	655	19	237		300	251	213	285	209	209	246	243	219	105		640.6	218	562.261
																16	314	258	260	304	284	222	280	267	244	15	133	9	684	29	254		298	242	244	288	268	206	264	251	228	118		675	225	580.315
																20	319	274	241	316	266	260	299	243	239	20	124	12	651	25	273		299	254	221	296	246	240	279	223	219	104		639	248	639.636
																16	312	273	214	320	295	229	284	259	240	26	151	15.6	677	28	245		296	257	198	304	279	213	268	243	224	125		661.4	217	559.682
																15	330	271	269	291	275	247	296	243	219	27	127	16.2	665	21	236		315	256	254	276	260	232	281	228	204	100		648.8	215	554.523
																14	338	262	253	303	289	285	260	257	209	31	128	18.6	652	23	267		324	248	239	289	275	271	246	243	195	97		633.4	244	629.32
																22	300	258	254	291	287	216	284	269	264	19	121	11.4	625	24	268		278	236	232	269	265	194	262	247	242	102		613.6	244	629.32
																15	286	240	254	319	279	256	264	281	197	15	132	9	704	24	244		271	225	239	304	264	241	249	266	182	117		695	220	567.419
																19	301	261	239	299	267	234	311	268	225	18	147	10.8	674	25	285		282	242	220	280	248	215	292	249	206	129		663.2	260	670.586
																25	317	265	250	310	292	229	289	253	228	27	130	16.2	664	28	257		292	240	225	285	267	204	264	228	203	103		647.8	229	590.632
																31	296	280	253	327	266	262	309	256	216	28	146	16.8	682	15	269		265	249	222	296	235	231	278	225	185	118		665.2	254	655.111
																27	328	279	256	278	263	236	308	253	221	17	148	10.2	653	15	253		301	252	229	251	236	209	281	226	194	131		642.8	238	613.844
																16	295	265	247	286	292	242	288	285	206	32	125	19.2	688	20	262		279	249	231	270	276	226	272	269	190	93		668.8	242	624.161
																20	314	242	241	300	314	243	270	256	234	16	123	9.6	640	28	253		294	222	221	280	294	223	250	236	214	107		630.4	225	580.315
																23	297	279	256	308	236	262	309	265	221	24	144	14.4	646	31	281		274	256	233	285	213	239	286	242	198	120		631.6	250	644.795
																28	305	304	216	322	296	240	286	286	258	31	129	18.6	638	22	247		277	276	188	294	268	212	258	258	230	98		619.4	225	580.315
																26	303	276	239	288	273	249	297	264	229	19	145	11.4	612	24	235		277	250	213	262	247	223	271	238	203	126		600.6	211	544.207
																23	291	271	239	320	308	256	282	257	227	16	128	9.6	686	19	250		268	248	216	297	285	233	259	234	204	112		676.4	231	595.79
																22	324	285	231	301	281	212	294	269	267	20	150	12	656	23	274		302	263	209	279	259	190	272	247	245	130		644	251	647.374
																19	300	294	241	322	298	236	301	275	213	21	130	12.6	673	22	254		281	275	222	303	279	217	282	256	194	109		660.4	232	598.369
																27	310	248	241	304	266	227	282	232	217	17	127	10.2	647	24	272		283	221	214	277	239	200	255	205	190	110		636.8	248	639.636
																22	310	295	241	323	274	237	289	259	256	28	124	16.8	684	20	258		288	273	219	301	252	215	267	237	234	96		667.2	238	613.844
																31	301	258	254	257	277	234	278	267	231	13	126	7.8	718	30	268		270	227	223	226	246	203	247	236	200	113		710.2	238	613.844
																37	313	259	245	316	279	247	292	265	244	18	134	10.8	668	26	258		276	222	208	279	242	210	255	228	207	116		657.2	232	598.369
																12	287	304	250	288	273	260	256	257	213	20	122	12	624	22	244		275	292	238	276	261	248	244	245	201	102		612	222	572.578
																33	290	258	248	315	290	238	279	265	238	19	122	11.4	685	21	257		257	225	215	282	257	205	246	232	205	103		673.6	236	608.686
																21	301	275	221	303	235	247	288	279	237	17	119	10.2	663	18	239		280	254	200	282	214	226	267	258	216	102		652.8	221	569.998
																25	320	298	263	290	291	227	274	247	235	26	135	15.6	662	18	267		295	273	238	265	266	202	249	222	210	109		646.4	249	642.215
																24	313	260	253	271	253	242	306	240	227	26	141	15.6	619	28	262		289	236	229	247	229	218	282	216	203	115		603.4	234	603.528
																22	307	263	224	315	275	247	253	280	235	27	128	16.2	622	17	255		285	241	202	293	253	225	231	258	213	101		605.8	238	613.844
																29	287	269	221	292	270	252	301	258	220	14	122	8.4	666	26	272		258	240	192	263	241	223	272	229	191	108		657.6	246	634.478
																25	304	282	212	318	277	239	311	249	223	23	127	13.8	649	16	245		279	257	187	293	252	214	286	224	198	104		635.2	229	590.632
																25	317	272	261	292	290	224	259	259	223	26	140	15.6	594	22	229		292	247	236	267	265	199	234	234	198	114		578.4	207	533.89
																24	289	283	228	297	253	257	289	230	250	26	115	15.6	639	18	255		265	259	204	273	229	233	265	206	226	89		623.4	237	611.265
																23	311	244	237	280	290	260	282	252	221	24	139	14.4	660	21	263		288	221	214	257	267	237	259	229	198	115		645.6	242	624.161
																22	301	303	252	317	262	230	255	234	223	15	133	9	669	17	262		279	281	230	295	240	208	233	212	201	118		660	245	631.899
																20	303	286	229	287	279	244	260	257	230	23	157	13.8	584	27	241		283	266	209	267	259	224	240	237	210	134		570.2	214	551.944
																18	308	265	236	309	275	238	263	237	239	21	134	12.6	626	26	216		290	247	218	291	257	220	245	219	221	113		613.4	190	490.044
																29	333	265	229	309	305	255	298	265	244	24	132	14.4	651	26	248		304	236	200	280	276	226	269	236	215	108		636.6	222	572.578
																40	300	263	252	291	262	246	321	259	231	23	127	13.8	628	25	239		260	223	212	251	222	206	281	219	191	104		614.2	214	551.944
																23	346	306	244	278	290	255	282	247	214	22	115	13.2	681	24	269		323	283	221	255	267	232	259	224	191	93		667.8	245	631.899
																23	318	248	258	320	233	204	293	247	226	23	141	13.8	614	27	238		295	225	235	297	210	181	270	224	203	118		600.2	211	544.207
																22	313	298	244	287	256	253	271	262	224	26	122	15.6	631	23	256		291	276	222	265	234	231	249	240	202	96		615.4	233	600.949
																29	287	265	245	298	282	284	267	258	245	17	146	10.2	675	22	255		258	236	216	269	253	255	238	229	216	129		664.8	233	600.949
																20	285	309	245	307	311	266	273	250	225	19	145	11.4	638	20	240		265	289	225	287	291	246	253	230	205	126		626.6	220	567.419
																22	302	247	238	327	227	251	299	291	230	25	130	15	648	26	258		280	225	216	305	205	229	277	269	208	105		633	232	598.369
																22	296	274	249	278	271	240	267	273	249	32	139	19.2	601	21	252		274	252	227	256	249	218	245	251	227	107		581.8	231	595.79
																19	292	283	260	301	281	251	294	260	237	16	116	9.6	693	28	264		273	264	241	282	262	232	275	241	218	100		683.4	236	608.686
																24	294	283	236	296	294	251	296	279	218	13	125	7.8	639	19	274		270	259	212	272	270	227	272	255	194	112		631.2	255	657.69
																32	308	302	264	298	234	248	293	267	249	22	168	13.2	705	22	265		276	270	232	266	202	216	261	235	217	146		691.8	243	626.74
																20	286	286	237	288	279	247	303	276	217	25	134	15	601	19	268		266	266	217	268	259	227	283	256	197	109		586	249	642.215
																25	293	295	268	316	294	246	306	251	232	26	123	15.6	654	19	283		268	270	243	291	269	221	281	226	207	97		638.4	264	680.903
																31	335	242	223	292	264	250	299	258	222	24	120	14.4	676	28	240		304	211	192	261	233	219	268	227	191	96		661.6	212	546.786
																31	317	302	235	287	280	218	273	263	254	25	125	15	657	29	250		286	271	204	256	249	187	242	232	223	100		642	221	569.998
																30	330	291	241	322	297	245	304	236	233	31	135	18.6	662	25	269		300	261	211	292	267	215	274	206	203	104		643.4	244	629.32
																28	288	275	249	309	291	229	296	266	203	27	135	16.2	653	19	258		260	247	221	281	263	201	268	238	175	108		636.8	239	616.424
																25	301	296	253	318	289	245	286	254	245	26	128	15.6	665	28	271		276	271	228	293	264	220	261	229	220	102		649.4	243	626.74
																25	334	261	220	302	295	241	287	242	249	28	120	16.8	679	28	261		309	236	195	277	270	216	262	217	224	92		662.2	233	600.949
																29	342	245	229	324	264	249	307	265	226	21	138	12.6	600	23	249		313	216	200	295	235	220	278	236	197	117		587.4	226	582.894
																27	308	286	256	321	273	250	281	266	234	25	137	15	677	30	235		281	259	229	294	246	223	254	239	207	112		662	205	528.732
																34	323	304	224	300	259	222	307	268	236	22	142	13.2	621	27	246		289	270	190	266	225	188	273	234	202	120		607.8	219	564.84
																16	306	262	241	296	293	221	295	273	208	31	145	18.6	632	20	246		290	246	225	280	277	205	279	257	192	114		613.4	226	582.894
																25	323	282	273	266	293	230	294	245	251	20	144	12	709	32	258		298	257	248	241	268	205	269	220	226	124		697	226	582.894
																29	318	299	270	290	268	218	285	249	241	21	128	12.6	639	33	228		289	270	241	261	239	189	256	220	212	107		626.4	195	502.94
																28	336	267	251	301	273	234	265	270	241	21	129	12.6	681	40	277		308	239	223	273	245	206	237	242	213	108		668.4	237	611.265
																24	283	291	269	295	308	239	292	262	257	26	118	15.6	653	24	258		259	267	245	271	284	215	268	238	233	92		637.4	234	603.528
																23	308	259	241	328	283	235	279	260	206	25	136	15	676	35	283		285	236	218	305	260	212	256	237	183	111		661	248	639.636
																26	298	253	257	304	291	232	294	275	235	25	119	15	645	27	238		272	227	231	278	265	206	268	249	209	94		630	211	544.207
																22	330	261	278	322	266	222	296	282	241	26	131	15.6	625	20	259		308	239	256	300	244	200	274	260	219	105		609.4	239	616.424
																33	319	293	246	311	310	232	278	280	241	32	141	19.2	646	20	243		286	260	213	278	277	199	245	247	208	109		626.8	223	575.157
																27	304	296	268	311	281	207	339	264	254	26	139	15.6	692	21	237		277	269	241	284	254	180	312	237	227	113		676.4	216	557.103
																25	318	269	247	301	319	250	281	261	252	23	115	13.8	641	30	294		293	244	222	276	294	225	256	236	227	92		627.2	264	680.903
																24	270	267	239	317	269	218	311	272	233	21	134	12.6	683	21	259		246	243	215	293	245	194	287	248	209	113		670.4	238	613.844
																36	290	268	246	302	293	217	272	282	228	30	128	18	651	36	319		254	232	210	266	257	181	236	246	192	98		633	283	729.907
																29	321	289	239	312	296	237	296	279	215	28	154	16.8	690	26	281		292	260	210	283	267	208	267	250	186	126		673.2	255	657.69
																27	342	285	243	293	319	212	289	258	235	29	165	17.4	634	28	281		315	258	216	266	292	185	262	231	208	136		616.6	253	652.532
																27	342	284	242	286	290	256	329	276	264	39	129	23.4	644	30	236		315	257	215	259	263	229	302	249	237	90		620.6	206	531.311
																33	289	279	269	332	264	267	292	270	210	30	148	18	632	25	266		256	246	236	299	231	234	259	237	177	118		614	241	621.582
																23	320	247	273	301	272	259	271	252	245	22	133	13.2	652	25	262		297	224	250	278	249	236	248	229	222	111		638.8	237	611.265
																30	320	288	260	323	312	259	282	302	251	29	146	17.4	614	30	241		290	258	230	293	282	229	252	272	221	117		596.6	211	544.207
																27	305	282	252	297	288	253	266	250	259	23	152	13.8	654	34	285		278	255	225	270	261	226	239	223	232	129		640.2	251	647.374
																27	312	260	255	280	268	233	307	277	256	28	135	16.8	664	20	301		285	233	228	253	241	206	280	250	229	107		647.2	281	724.749
																22	315	274	256	322	285	254	278	248	231	37	157	22.2	649	27	292		293	252	234	300	263	232	256	226	209	120		626.8	265	683.482
																27	329	286	257	300	288	242	270	260	263	34	163	20.4	657	29	260		302	259	230	273	261	215	243	233	236	129		636.6	231	595.79
																26	313	275	239	331	271	262	254	275	273	27	139	16.2	685	30	263		287	249	213	305	245	236	228	249	247	112		668.8	233	600.949
																26	317	276	227	308	277	234	279	271	239	28	137	16.8	639	24	273		291	250	201	282	251	208	253	245	213	109		622.2	249	642.215
																26	337	308	267	279	260	244	296	279	245	26	132	15.6	677	32	260		311	282	241	253	234	218	270	253	219	106		661.4	228	588.053
																29	307	291	271	319	264	249	308	269	237	25	148	15	699	35	253		278	262	242	290	235	220	279	240	208	123		684	218	562.261
																29	321	289	267	305	296	250	302	291	257	29	151	17.4	696	27	269		292	260	238	276	267	221	273	262	228	122		678.6	242	624.161
																31	317	252	274	336	310	247	297	248	241	32	137	19.2	679	33	259		286	221	243	305	279	216	266	217	210	105		659.8	226	582.894
																27	308	261	270	277	263	242	303	243	267	23	130	13.8	648	38	281		281	234	243	250	236	215	276	216	240	107		634.2	243	626.74
																32	314	285	254	331	290	242	284	286	207	30	135	18	731	23	264		282	253	222	299	258	210	252	254	175	105		713	241	621.582
																33	315	277	253	290	232	258	309	284	246	30	159	18	650	34	283		282	244	220	257	199	225	276	251	213	129		632	249	642.215
																39	310	269	257	328	281	244	316	276	248	33	157	19.8	682	34	309		271	230	218	289	242	205	277	237	209	124		662.2	275	709.274
																35	321	296	294	328	322	271	318	254	250	28	151	16.8	627	43	271		286	261	259	293	287	236	283	219	215	123		610.2	228	588.053
																31	320	284	269	298	301	245	286	248	240	31	144	18.6	682	37	296		289	253	238	267	270	214	255	217	209	113		663.4	259	668.007
																28	329	282	237	317	291	263	280	254	279	24	153	14.4	661	22	272		301	254	209	289	263	235	252	226	251	129		646.6	250	644.795
																30	327	294	269	330	290	264	293	271	232	33	136	19.8	678	37	284		297	264	239	300	260	234	263	241	202	103		658.2	247	637.057
																29	347	262	290	330	298	234	311	275	268	28	139	16.8	733	35	278		318	233	261	301	269	205	282	246	239	111		716.2	243	626.74
																41	302	272	262	340	298	275	322	266	229	26	156	15.6	677	27	261		261	231	221	299	257	234	281	225	188	130		661.4	234	603.528
																39	351	237	249	314	259	243	308	280	221	35	165	21	674	27	295		312	198	210	275	220	204	269	241	182	130		653	268	691.22
																23	343	307	253	309	251	267	309	285	249	27	156	16.2	682	34	278		320	284	230	286	228	244	286	262	226	129		665.8	244	629.32
																25	299	328	284	327	291	265	324	241	235	33	147	19.8	660	33	298		274	303	259	302	266	240	299	216	210	114		640.2	265	683.482
																30	311	292	250	290	274	261	277	299	240	29	149	17.4	669	33	264		281	262	220	260	244	231	247	269	210	120		651.6	231	595.79
																37	353	266	249	325	291	227	321	287	231	34	159	20.4	669	34	310		316	229	212	288	254	190	284	250	194	125		648.6	276	711.853
																36	326	308	261	306	289	235	305	273	270	34	165	20.4	680	33	281		290	272	225	270	253	199	269	237	234	131		659.6	248	639.636
																35	312	282	275	308	324	260	302	292	255	32	138	19.2	679	47	265		277	247	240	273	289	225	267	257	220	106		659.8	218	562.261
																37	345	300	238	353	292	260	283	257	238	47	151	28.2	689	26	294		308	263	201	316	255	223	246	220	201	104		660.8	268	691.22
																34	334	297	263	305	315	245	312	279	272	45	128	27	687	35	237		300	263	229	271	281	211	278	245	238	83		660	202	520.994
																37	335	287	263	326	294	251	319	261	239	38	137	22.8	617	32	305		298	250	226	289	257	214	282	224	202	99		594.2	273	704.116
																35	328	285	230	344	292	256	330	249	242	38	172	22.8	709	29	275		293	250	195	309	257	221	295	214	207	134		686.2	246	634.478
																29	357	308	259	352	326	241	297	271	258	41	155	24.6	713	33	292		328	279	230	323	297	212	268	242	229	114		688.4	259	668.007
																38	312	266	247	304	311	253	294	257	244	43	150	25.8	678	27	275		274	228	209	266	273	215	256	219	206	107		652.2	248	639.636
																26	306	279	262	311	292	243	300	275	223	33	150	19.8	659	27	302		280	253	236	285	266	217	274	249	197	117		639.2	275	709.274
																36	342	310	232	298	297	255	328	289	243	30	169	18	680	29	294		306	274	196	262	261	219	292	253	207	139		662	265	683.482
																36	312	292	264	321	294	248	315	303	264	28	160	16.8	664	42	301		276	256	228	285	258	212	279	267	228	132		647.2	259	668.007
																31	328	320	286	289	324	275	296	303	261	40	158	24	682	30	285		297	289	255	258	293	244	265	272	230	118		658	255	657.69
																32	340	312	260	295	273	275	340	293	281	39	157	23.4	653	29	281		308	280	228	263	241	243	308	261	249	118		629.6	252	649.953
																40	344	316	242	367	298	248	322	283	264	40	169	24	663	31	280		304	276	202	327	258	208	282	243	224	129		639	249	642.215
																33	330	319	261	334	263	261	346	286	278	33	150	19.8	717	44	290		297	286	228	301	230	228	313	253	245	117		697.2	246	634.478
																34	323	279	270	317	322	249	325	248	268	40	172	24	723	48	295		289	245	236	283	288	215	291	214	234	132		699	247	637.057
																41	362	307	270	331	297	280	302	272	251	34	144	20.4	693	40	306		321	266	229	290	256	239	261	231	210	110		672.6	266	686.061
																34	341	297	267	306	325	265	327	299	249	25	151	15	729	39	284		307	263	233	272	291	231	293	265	215	126		714	245	631.899
																41	374	295	265	324	311	274	332	285	245	38	177	22.8	726	41	304		333	254	224	283	270	233	291	244	204	139		703.2	263	678.324
																31	323	308	239	329	300	256	318	298	248	42	161	25.2	649	46	294		292	277	208	298	269	225	287	267	217	119		623.8	248	639.636
																43	309	270	259	331	295	283	339	256	276	41	149	24.6	710	29	277		266	227	216	288	252	240	296	213	233	108		685.4	248	639.636
																33	343	281	270	324	362	286	315	241	270	55	160	33	711	40	320		310	248	237	291	329	253	282	208	237	105		678	280	722.17
																46	344	333	250	334	290	267	306	291	290	36	172	21.6	690	44	332		298	287	204	288	244	221	260	245	244	136		668.4	288	742.803
																40	376	313	305	349	325	289	303	290	261	53	147	31.8	680	45	305		336	273	265	309	285	249	263	250	221	94		648.2	260	670.586
																58	362	337	270	362	375	307	349	318	291	55	179	33	717	47	299		304	279	212	304	317	249	291	260	233	124		684	252	649.953
																50	370	330	294	322	327	271	342	307	294	50	166	30	776	37	293		320	280	244	272	277	221	292	257	244	116		746	256	660.27
																52	309	324	264	336	310	277	307	316	246	43	161	25.8	696	47	302		257	272	212	284	258	225	255	264	194	118		670.2	255	657.69
																43	345	330	236	305	337	257	331	269	262	36	179	21.6	718	34	271		302	287	193	262	294	214	288	226	219	143		696.4	237	611.265
																35	325	279	305	336	338	264	293	300	272	34	159	20.4	733	36	274		290	244	270	301	303	229	258	265	237	125		712.6	238	613.844
																52	331	301	269	336	304	280	305	319	240	53	152	31.8	735	42	307		279	249	217	284	252	228	253	267	188	99		703.2	265	683.482
																39	321	293	243	340	288	264	370	280	249	46	151	27.6	787	50	297		282	254	204	301	249	225	331	241	210	105		759.4	247	637.057
																37	291	290	299	345	316	255	329	284	279	42	176	25.2	755	38	291		254	253	262	308	279	218	292	247	242	134		729.8	253	652.532
																50	369	332	273	312	318	262	307	272	231	46	152	27.6	751	55	301		319	282	223	262	268	212	257	222	181	106		723.4	246	634.478
																63	363	299	305	329	320	278	326	296	273	53	183	31.8	686	50	293		300	236	242	266	257	215	263	233	210	130		654.2	243	626.74
																55	370	356	277	312	332	277	313	299	285	60	150	36	729	47	306		315	301	222	257	277	222	258	244	230	90		693	259	668.007
																46	332	302	293	326	290	290	325	307	270	47	152	28.2	733	48	308		286	256	247	280	244	244	279	261	224	105		704.8	260	670.586
																41	355	320	264	357	313	254	324	275	239	40	178	24	710	51	295		314	279	223	316	272	213	283	234	198	138		686	244	629.32
																46	316	300	269	366	328	286	290	265	270	37	159	22.2	721	50	305		270	254	223	320	282	240	244	219	224	122		698.8	255	657.69
																42	333	273	267	320	318	278	312	305	262	44	143	26.4	773	28	325		291	231	225	278	276	236	270	263	220	99		746.6	297	766.016
																29	319	289	274	341	311	273	311	303	282	30	168	18	664	35	265		290	260	245	312	282	244	282	274	253	138		646	230	593.211
																31	349	320	282	353	332	263	303	283	277	24	160	14.4	737	44	316		318	289	251	322	301	232	272	252	246	136		722.6	272	701.537
																41	332	308	291	312	319	295	325	311	289	32	177	19.2	738	32	304		291	267	250	271	278	254	284	270	248	145		718.8	272	701.537
																40	365	304	275	360	351	270	320	268	251	56	159	33.6	730	49	310		325	264	235	320	311	230	280	228	211	103		696.4	261	673.166
																35	367	286	290	316	288	279	311	295	278	50	176	30	694	39	279		332	251	255	281	253	244	276	260	243	126		664	240	619.003
																35	334	316	276	355	290	281	303	296	266	42	147	25.2	733	44	306		299	281	241	320	255	246	268	261	231	105		707.8	262	675.745
																32	327	306	295	320	344	285	307	269	255	37	144	22.2	786	50	361		295	274	263	288	312	253	275	237	223	107		763.8	311	802.124
																50	380	300	279	320	312	264	336	278	247	37	175	22.2	720	42	311		330	250	229	270	262	214	286	228	197	138		697.8	269	693.799
																51	326	282	267	307	341	285	291	284	278	35	143	21	681	31	313		275	231	216	256	290	234	240	233	227	108		660	282	727.328
																46	303	343	253	317	314	265	366	266	275	43	163	25.8	686	34	273		257	297	207	271	268	219	320	220	229	120		660.2	239	616.424
																41	357	342	295	369	319	246	330	272	255	45	179	27	706	41	351		316	301	254	328	278	205	289	231	214	134		679	310	799.545
																36	360	307	318	373	327	267	317	287	258	44	161	26.4	697	47	280		324	271	282	337	291	231	281	251	222	117		670.6	233	600.949
																41	356	281	302	334	325	247	288	296	271	43	152	25.8	737	39	301		315	240	261	293	284	206	247	255	230	109		711.2	262	675.745
																35	305	292	300	323	303	277	315	305	330	38	152	22.8	756	46	298		270	257	265	288	268	242	280	270	295	114		733.2	252	649.953
																45	339	284	259	349	329	260	320	303	295	53	173	31.8	723	47	277		294	239	214	304	284	215	275	258	250	120		691.2	230	593.211
																44	347	303	279	348	303	268	299	296	289	40	185	24	743	45	307		303	259	235	304	259	224	255	252	245	145		719	262	675.745
																42	333	286	286	343	332	302	357	293	263	52	169	31.2	768	51	315		291	244	244	301	290	260	315	251	221	117		736.8	264	680.903
																57	368	342	285	324	316	254	311	290	247	44	171	26.4	778	31	333		311	285	228	267	259	197	254	233	190	127		751.6	302	778.912
																48	335	299	256	346	331	265	322	328	267	37	181	22.2	725	37	312		287	251	208	298	283	217	274	280	219	144		702.8	275	709.274
																39	363	314	303	336	309	277	359	300	273	28	179	16.8	730	52	294		324	275	264	297	270	238	320	261	234	151		713.2	242	624.161
																34	338	302	279	398	337	279	325	306	274	48	166	28.8	738	40	318		304	268	245	364	303	245	291	272	240	118		709.2	278	717.012
																43	367	315	270	369	322	300	361	257	264	53	166	31.8	778	35	293		324	272	227	326	279	257	318	214	221	113		746.2	258	665.428
																51	375	312	304	326	321	284	316	292	253	50	162	30	787	50	309		324	261	253	275	270	233	265	241	202	112		757	259	668.007
																40	325	314	297	326	309	279	314	285	272	49	158	29.4	716	48	316		285	274	257	286	269	239	274	245	232	109		686.6	268	691.22
																52	328	334	284	360	304	266	330	301	279	51	162	30.6	727	46	296		276	282	232	308	252	214	278	249	227	111		696.4	250	644.795
																38	365	311	309	344	308	302	305	313	249	38	179	22.8	803	42	335		327	273	271	306	270	264	267	275	211	141		780.2	293	755.699
																48	379	334	277	331	298	257	325	290	258	44	156	26.4	750	44	347		331	286	229	283	250	209	277	242	210	112		723.6	303	781.491
																41	360	318	253	353	323	317	361	334	291	59	189	35.4	804	48	350		319	277	212	312	282	276	320	293	250	130		768.6	302	778.912
																37	394	298	279	368	328	290	364	310	287	38	180	22.8	776	37	323		357	261	242	331	291	253	327	273	250	142		753.2	286	737.645
																45	347	326	277	384	342	305	323	320	298	33	184	19.8	794	56	312		302	281	232	339	297	260	278	275	253	151		774.2	256	660.27
																39	349	343	274	351	328	284	340	325	271	51	170	30.6	746	54	334		310	304	235	312	289	245	301	286	232	119		715.4	280	722.17
																50	348	370	285	349	322	303	351	310	273	37	179	22.2	740	34	341		298	320	235	299	272	253	301	260	223	142		717.8	307	791.808
																39	365	311	259	305	322	264	321	281	273	39	181	23.4	762	44	269		326	272	220	266	283	225	282	242	234	142		738.6	225	580.315
																48	356	300	278	374	332	279	361	289	256	42	179	25.2	750	52	332		308	252	230	326	284	231	313	241	208	137		724.8	280	722.17
																47	358	329	320	335	309	280	328	291	282	45	180	27	742	40	311		311	282	273	288	262	233	281	244	235	135		715	271	698.957
																42	369	348	310	368	321	251	352	260	255	47	151	28.2	763	35	319		327	306	268	326	279	209	310	218	213	104		734.8	284	732.487
																49	357	340	273	319	313	268	306	282	285	47	178	28.2	774	41	342		308	291	224	270	264	219	257	233	236	131		745.8	301	776.333
																44	330	310	313	326	369	288	323	314	278	44	172	26.4	742	54	310		286	266	269	282	325	244	279	270	234	128		715.6	256	660.27
																47	394	353	286	357	335	261	335	319	281	43	177	25.8	746	45	298		347	306	239	310	288	214	288	272	234	134		720.2	253	652.532
																58	356	348	291	383	321	287	330	274	297	55	183	33	758	57	289		298	290	233	325	263	229	272	216	239	128		725	232	598.369
																48	354	371	293	354	349	308	317	318	254	44	177	26.4	746	56	342		306	323	245	306	301	260	269	270	206	133		719.6	286	737.645
																42	363	329	302	352	310	287	361	288	299	40	192	24	764	51	287		321	287	260	310	268	245	319	246	257	152		740	236	608.686
																62	337	342	275	347	352	262	333	325	297	63	158	37.8	758	51	322		275	280	213	285	290	200	271	263	235	95		720.2	271	698.957
																47	344	340	268	355	350	314	327	312	267	51	191	30.6	758	41	344		297	293	221	308	303	267	280	265	220	140		727.4	303	781.491
																46	333	297	275	364	341	280	341	262	281	37	165	22.2	776	42	312		287	251	229	318	295	234	295	216	235	128		753.8	270	696.378
																49	347	352	285	346	342	275	318	327	264	42	173	25.2	773	41	304		298	303	236	297	293	226	269	278	215	131		747.8	263	678.324
																55	329	309	275	339	366	271	338	308	269	54	163	32.4	711	55	291		274	254	220	284	311	216	283	253	214	109		678.6	236	608.686
																47	313	324	295	392	304	287	339	319	278	35	189	21	771	47	318		266	277	248	345	257	240	292	272	231	154		750	271	698.957
																34	358	304	303	341	348	292	338	306	292	47	175	28.2	715	44	282		324	270	269	307	314	258	304	272	258	128		686.8	238	613.844
																46	349	346	267	347	346	279	352	268	290	40	159	24	728	42	286		303	300	221	301	300	233	306	222	244	119		704	244	629.32
																44	347	331	305	355	351	305	339	300	303	32	156	19.2	790	56	305		303	287	261	311	307	261	295	256	259	124		770.8	249	642.215
																41	371	296	260	348	360	315	313	321	239	40	170	24	746	53	311		330	255	219	307	319	274	272	280	198	130		722	258	665.428
																60	389	359	293	374	311	284	321	311	288	39	200	23.4	834	45	292		329	299	233	314	251	224	261	251	228	161		810.6	247	637.057
																58	363	323	285	354	294	299	364	306	303	44	162	26.4	746	46	331		305	265	227	296	236	241	306	248	245	118		719.6	285	735.066
																55	341	337	264	369	315	311	338	312	278	50	183	30	799	53	344		286	282	209	314	260	256	283	257	223	133		769	291	750.541
																42	384	328	325	322	317	266	367	290	276	39	174	23.4	808	36	338		342	286	283	280	275	224	325	248	234	135		784.6	302	778.912
																42	389	317	298	344	338	278	325	290	292	49	171	29.4	736	52	345		347	275	256	302	296	236	283	248	250	122		706.6	293	755.699
																60	359	328	315	385	330	266	309	348	262	44	169	26.4	769	35	299		299	268	255	325	270	206	249	288	202	125		742.6	264	680.903
																43	370	350	277	352	343	315	365	317	289	42	160	25.2	784	53	309		327	307	234	309	300	272	322	274	246	118		758.8	256	660.27
																63	366	344	321	356	314	283	309	315	267	53	155	31.8	772	44	300		303	281	258	293	251	220	246	252	204	102		740.2	256	660.27
																37	356	315	278	348	359	301	339	324	289	47	143	28.2	744	43	293		319	278	241	311	322	264	302	287	252	96		715.8	250	644.795
																50	355	333	301	365	377	308	336	327	268	29	187	17.4	743	46	321		305	283	251	315	327	258	286	277	218	158		725.6	275	709.274
																46	336	332	280	381	325	313	362	305	267	59	190	35.4	751	54	310		290	286	234	335	279	267	316	259	221	131		715.6	256	660.27
																44	368	319	307	369	321	328	381	340	278	62	166	37.2	804	48	334		324	275	263	325	277	284	337	296	234	104		766.8	286	737.645
																54	371	347	304	344	346	283	333	284	319	48	170	28.8	766	57	291		317	293	250	290	292	229	279	230	265	122		737.2	234	603.528
																54	357	306	314	387	346	290	370	333	293	58	183	34.8	778	50	308		303	252	260	333	292	236	316	279	239	125		743.2	258	665.428
																60	371	340	293	320	342	295	325	328	257	65	186	39	754	55	349		311	280	233	260	282	235	265	268	197	121		715	294	758.278
																33	389	308	284	347	321	295	331	311	307	50	192	30	738	41	342		356	275	251	314	288	262	298	278	274	142		708	301	776.333
																52	358	335	296	364	355	319	343	321	275	54	172	32.4	778	59	340		306	283	244	312	303	267	291	269	223	118		745.6	281	724.749
																62	381	321	252	374	373	312	374	335	282	43	174	25.8	770	42	351		319	259	190	312	311	250	312	273	220	131		744.2	309	796.966
																45	397	318	301	364	361	280	359	361	290	44	175	26.4	785	54	319		352	273	256	319	316	235	314	316	245	131		758.6	265	683.482
																65	309	346	306	359	298	277	363	278	265	34	176	20.4	712	35	316		244	281	241	294	233	212	298	213	200	142		691.6	281	724.749
																46	364	340	298	365	337	278	361	335	257	44	183	26.4	768	56	314		318	294	252	319	291	232	315	289	211	139		741.6	258	665.428
																47	381	335	325	368	318	318	367	308	294	58	167	34.8	776	58	319		334	288	278	321	271	271	320	261	247	109		741.2	261	673.166
																52	356	295	289	379	314	285	343	322	270	49	174	29.4	742	45	344		304	243	237	327	262	233	291	270	218	125		712.6	299	771.174
																48	347	332	300	345	331	299	354	303	294	50	153	30	790	52	325		299	284	252	297	283	251	306	255	246	103		760	273	704.116
																54	353	332	313	357	348	319	342	374	260	39	190	23.4	763	48	316		299	278	259	303	294	265	288	320	206	151		739.6	268	691.22
																43	395	329	294	387	315	327	334	292	270	54	170	32.4	794	49	323		352	286	251	344	272	284	291	249	227	116		761.6	274	706.695
																47	362	320	325	328	339	303	333	309	265	64	177	38.4	746	49	331		315	273	278	281	292	256	286	262	218	113		707.6	282	727.328
																39	378	314	278	357	339	279	356	315	280	58	189	34.8	782	50	330		339	275	239	318	300	240	317	276	241	131		747.2	280	722.17
																43	348	320	314	327	355	280	356	314	298	41	174	24.6	769	43	341		305	277	271	284	312	237	313	271	255	133		744.4	298	768.595
																41	354	333	293	370	354	303	363	305	279	67	180	40.2	813	50	314		313	292	252	329	313	262	322	264	238	113		772.8	264	680.903
																49	329	348	296	328	373	306	359	297	275	46	181	27.6	772	43	305		280	299	247	279	324	257	310	248	226	135		744.4	262	675.745
																52	401	348	257	377	352	309	359	374	270	56	179	33.6	740	51	314		349	296	205	325	300	257	307	322	218	123		706.4	263	678.324
																47	389	361	327	368	319	278	338	346	320	54	166	32.4	788	57	320		342	314	280	321	272	231	291	299	273	112		755.6	263	678.324
																42	355	342	325	334	362	289	380	284	280	46	175	27.6	789	52	333		313	300	283	292	320	247	338	242	238	129		761.4	281	724.749
																57	385	333	298	415	323	284	348	296	285	48	186	28.8	728	44	331		328	276	241	358	266	227	291	239	228	138		699.2	287	740.224
																46	368	293	295	378	327	290	352	324	320	44	192	26.4	828	54	326		322	247	249	332	281	244	306	278	274	148		801.6	272	701.537
																52	376	311	292	395	344	281	346	353	279	59	180	35.4	804	44	325		324	259	240	343	292	229	294	301	227	121		768.6	281	724.749
																43	399	322	309	381	373	279	335	322	269	52	191	31.2	787	50	342		356	279	266	338	330	236	292	279	226	139		755.8	292	753.12
																34	365	316	273	351	349	303	355	343	291	43	172	25.8	778	35	339		331	282	239	317	315	269	321	309	257	129		752.2	304	784.07
																41	374	314	283	384	363	318	368	308	310	56	182	33.6	755	50	320		333	273	242	343	322	277	327	267	269	126		721.4	270	696.378
																61	397	309	336	347	336	316	346	342	288	53	179	31.8	821	55	329		336	248	275	286	275	255	285	281	227	126		789.2	274	706.695
																63	390	308	324	383	354	268	359	333	257	54	200	32.4	812	49	342		327	245	261	320	291	205	296	270	194	146		779.6	293	755.699
																51	404	351	326	360	344	292	339	312	303	43	181	25.8	838	36	323		353	300	275	309	293	241	288	261	252	138		812.2	287	740.224
																56	383	329	314	384	366	286	342	293	285	56	210	33.6	766	60	311		327	273	258	328	310	230	286	237	229	154		732.4	251	647.374
																50	383	328	321	353	346	318	376	339	289	54	188	32.4	742	53	287		333	278	271	303	296	268	326	289	239	134		709.6	234	603.528
																44	407	327	308	364	326	307	370	328	270	50	177	30	831	73	330		363	283	264	320	282	263	326	284	226	127		801	257	662.849
																51	422	370	318	387	342	319	341	315	295	49	198	29.4	775	49	369		371	319	267	336	291	268	290	264	244	149		745.6	320	825.337
																44	340	332	314	372	356	300	395	327	280	51	168	30.6	852	54	290		296	288	270	328	312	256	351	283	236	117		821.4	236	608.686
																54	401	358	308	359	343	302	329	299	323	39	171	23.4	768	51	330		347	304	254	305	289	248	275	245	269	132		744.6	279	719.591
																42	387	315	302	397	341	319	362	338	285	53	201	31.8	752	50	306		345	273	260	355	299	277	320	296	243	148		720.2	256	660.27
																50	392	379	329	360	323	329	372	323	281	61	192	36.6	808	45	357		342	329	279	310	273	279	322	273	231	131		771.4	312	804.704
																52	399	327	307	365	363	306	371	361	292	52	155	31.2	783	47	326		347	275	255	313	311	254	319	309	240	103		751.8	279	719.591
																42	381	349	305	340	348	311	385	330	298	48	173	28.8	801	48	328		339	307	263	298	306	269	343	288	256	125		772.2	280	722.17
																47	379	351	309	366	364	299	362	338	304	46	170	27.6	753	52	310		332	304	262	319	317	252	315	291	257	124		725.4	258	665.428
																38	391	352	321	370	362	297	392	339	304	50	185	30	825	47	332		353	314	283	332	324	259	354	301	266	135		795	285	735.066
																50	392	350	311	397	355	322	382	345	295	44	202	26.4	751	40	335		342	300	261	347	305	272	332	295	245	158		724.6	295	760.858
																49	412	361	321	383	361	313	377	311	294	43	164	25.8	803	46	319		363	312	272	334	312	264	328	262	245	121		777.2	273	704.116
																58	406	350	302	394	368	310	372	329	279	52	185	31.2	799	56	306		348	292	244	336	310	252	314	271	221	133		767.8	250	644.795
																50	400	339	310	384	375	300	398	350	282	59	173	35.4	809	52	371		350	289	260	334	325	250	348	300	232	114		773.6	319	822.758
																43	398	332	294	402	369	305	357	327	275	54	239	32.4	815	50	346		355	289	251	359	326	262	314	284	232	185		782.6	296	763.437
																45	403	368	306	347	352	323	366	354	289	40	200	24	816	56	333		358	323	261	302	307	278	321	309	244	160		792	277	714.432
																55	422	361	323	393	357	314	390	304	287	57	198	34.2	789	34	353		367	306	268	338	302	259	335	249	232	141		754.8	319	822.758
																40	390	323	318	369	347	310	364	319	313	45	184	27	860	38	308		350	283	278	329	307	270	324	279	273	139		833	270	696.378
																53	384	353	294	365	379	298	402	332	305	51	175	30.6	711	52	344		331	300	241	312	326	245	349	279	252	124		680.4	292	753.12
																43	367	362	309	380	374	305	384	320	309	60	211	36	797	49	300		324	319	266	337	331	262	341	277	266	151		761	251	647.374
																44	419	401	309	382	368	306	362	334	307	52	200	31.2	792	57	337		375	357	265	338	324	262	318	290	263	148		760.8	280	722.17
																34	390	409	313	390	359	324	342	330	285	60	190	36	780	51	336		356	375	279	356	325	290	308	296	251	130		744	285	735.066
																48	392	352	325	367	376	320	369	365	324	52	169	31.2	790	56	313		344	304	277	319	328	272	321	317	276	117		758.8	257	662.849
																60	393	333	320	399	362	319	374	350	323	52	188	31.2	806	57	325		333	273	260	339	302	259	314	290	263	136		774.8	268	691.22
																47	406	353	290	388	386	310	391	358	309	53	182	31.8	794	53	329		359	306	243	341	339	263	344	311	262	129		762.2	276	711.853
																58	346	352	346	382	394	290	354	357	364	36	180	21.6	860	51	344		288	294	288	324	336	232	296	299	306	144		838.4	293	755.699
																47	398	362	322	424	385	310	389	316	332	40	236	24	848	58	381		351	315	275	377	338	263	342	269	285	196		824	323	833.075
																44	407	394	341	374	354	341	359	310	314	72	187	43.2	836	50	314		363	350	297	330	310	297	315	266	270	115		792.8	264	680.903
																41	369	357	314	377	382	303	376	346	301	61	169	36.6	820	48	325		328	316	273	336	341	262	335	305	260	108		783.4	277	714.432
																45	411	384	329	405	388	347	384	323	324	53	178	31.8	817	52	341		366	339	284	360	343	302	339	278	279	125		785.2	289	745.383
																54	379	379	321	383	386	294	382	366	327	42	184	25.2	830	53	319		325	325	267	329	332	240	328	312	273	142		804.8	266	686.061
																60	388	346	327	400	381	298	361	368	324	58	162	34.8	848	50	343		328	286	267	340	321	238	301	308	264	104		813.2	293	755.699
																45	395	352	351	405	330	314	381	327	317	50	188	30	824	50	329		350	307	306	360	285	269	336	282	272	138		794	279	719.591
																48	399	366	309	408	342	306	332	311	340	43	192	25.8	796	48	339		351	318	261	360	294	258	284	263	292	149		770.2	291	750.541
																45	350	359	338	395	307	290	362	341	328	50	182	30	789	53	319		305	314	293	350	262	245	317	296	283	132		759	266	686.061
																48	418	368	330	386	361	301	395	353	323	46	188	27.6	825	50	317		370	320	282	338	313	253	347	305	275	142		797.4	267	688.641
																57	424	353	336	355	362	306	362	321	301	52	198	31.2	782	48	336		367	296	279	298	305	249	305	264	244	146		750.8	288	742.803
																52	373	374	321	385	368	293	409	365	321	51	189	30.6	797	49	362		321	322	269	333	316	241	357	313	269	138		766.4	313	807.283
																51	382	351	366	380	375	306	371	347	326	40	174	24	839	65	295		331	300	315	329	324	255	320	296	275	134		815	230	593.211
																52	387	342	329	401	367	317	405	354	303	49	182	29.4	805	49	345		335	290	277	349	315	265	353	302	251	133		775.6	296	763.437
																53	370	311	293	390	379	307	395	313	313	40	185	24	782	50	354		317	258	240	337	326	254	342	260	260	145		758	304	784.07
																52	405	365	331	411	406	327	363	346	323	40	207	24	867	51	353		353	313	279	359	354	275	311	294	271	167		843	302	778.912
																52	385	385	334	400	404	283	398	367	311	50	164	30	809	45	357		333	333	282	348	352	231	346	315	259	114		779	312	804.704
																55	400	353	341	427	353	333	372	337	311	49	180	29.4	792	55	325		345	298	286	372	298	278	317	282	256	131		762.6	270	696.378
																51	378	376	361	438	358	317	365	378	335	47	188	28.2	833	58	333		327	325	310	387	307	266	314	327	284	141		804.8	275	709.274
																57	395	394	332	405	348	306	402	369	305	53	173	31.8	799	48	342		338	337	275	348	291	249	345	312	248	120		767.2	294	758.278
																44	393	365	306	378	349	344	397	336	338	53	181	31.8	866	64	337		349	321	262	334	305	300	353	292	294	128		834.2	273	704.116
																60	389	379	291	419	362	305	382	353	298	61	204	36.6	850	62	331		329	319	231	359	302	245	322	293	238	143		813.4	269	693.799
																55	410	356	327	414	392	322	374	362	310	50	183	30	849	40	331		355	301	272	359	337	267	319	307	255	133		819	291	750.541
																52	412	390	324	385	364	342	391	359	316	39	208	23.4	853	51	359		360	338	272	333	312	290	339	307	264	169		829.6	308	794.387
																45	415	395	345	400	366	310	387	356	301	44	189	26.4	856	49	324		370	350	300	355	321	265	342	311	256	145		829.6	275	709.274
																61	380	321	327	403	363	322	381	350	349	57	192	34.2	858	53	317		319	260	266	342	302	261	320	289	288	135		823.8	264	680.903
																53	424	335	374	392	369	303	384	338	306	40	159	24	860	59	369		371	282	321	339	316	250	331	285	253	119		836	310	799.545
																52	424	359	339	383	338	301	363	315	295	46	194	27.6	845	54	373		372	307	287	331	286	249	311	263	243	148		817.4	319	822.758
																63	349	353	334	371	358	323	395	338	329	41	212	24.6	839	48	314		286	290	271	308	295	260	332	275	266	171		814.4	266	686.061
																39	426	360	319	415	394	367	374	390	319	50	192	30	788	50	349		387	321	280	376	355	328	335	351	280	142		758	299	771.174
																56	384	373	343	363	387	307	373	341	319	42	224	25.2	833	61	373		328	317	287	307	331	251	317	285	263	182		807.8	312	804.704
																53	422	315	338	388	385	301	391	375	329	47	217	28.2	797	46	364		369	262	285	335	332	248	338	322	276	170		768.8	318	820.179
																50	393	353	322	403	376	307	382	362	306	56	179	33.6	870	50	344		343	303	272	353	326	257	332	312	256	123		836.4	294	758.278
																49	402	374	336	386	350	326	377	338	322	40	206	24	883	62	351		353	325	287	337	301	277	328	289	273	166		859	289	745.383
																39	426	385	318	411	405	345	397	352	293	42	207	25.2	834	54	322		387	346	279	372	366	306	358	313	254	165		808.8	268	691.22
																46	413	349	311	416	417	312	349	385	303	44	180	26.4	813	57	334		367	303	265	370	371	266	303	339	257	136		786.6	277	714.432
																49	404	366	304	403	372	318	378	337	341	50	216	30	845	46	310		355	317	255	354	323	269	329	288	292	166		815	264	680.903
																48	444	379	330	402	407	301	361	337	299	54	157	32.4	841	43	357		396	331	282	354	359	253	313	289	251	103		808.6	314	809.862
																50	425	331	320	391	383	303	380	344	310	50	210	30	839	53	348		375	281	270	341	333	253	330	294	260	160		809	295	760.858
																49	373	388	321	387	343	295	354	378	324	56	169	33.6	812	46	321		324	339	272	338	294	246	305	329	275	113		778.4	275	709.274
																45	421	394	320	427	374	340	387	347	324	40	171	24	858	43	323		376	349	275	382	329	295	342	302	279	131		834	280	722.17
																37	359	368	318	386	397	340	399	359	343	41	179	24.6	823	44	355		322	331	281	349	360	303	362	322	306	138		798.4	311	802.124
																58	398	384	315	425	342	291	363	338	303	59	163	35.4	788	42	356		340	326	257	367	284	233	305	280	245	104		752.6	314	809.862
																53	410	361	333	418	375	348	382	382	314	35	198	21	853	47	358		357	308	280	365	322	295	329	329	261	163		832	311	802.124
																56	382	366	305	396	369	317	358	339	290	55	198	33	874	52	334		326	310	249	340	313	261	302	283	234	143		841	282	727.328
																40	449	350	329	440	355	296	439	395	342	53	192	31.8	890	52	335		409	310	289	400	315	256	399	355	302	139		858.2	283	729.907
																45	411	356	316	360	396	304	433	383	338	41	176	24.6	843	44	348		366	311	271	315	351	259	388	338	293	135		818.4	304	784.07
																58	383	389	359	375	365	324	407	368	338	46	161	27.6	823	53	373		325	331	301	317	307	266	349	310	280	115		795.4	320	825.337
																51	427	356	334	390	411	303	405	366	315	42	167	25.2	832	54	351		376	305	283	339	360	252	354	315	264	125		806.8	297	766.016
																48	418	392	333	387	366	341	380	344	279	50	177	30	844	57	359		370	344	285	339	318	293	332	296	231	127		814	302	778.912
																46	388	345	308	412	400	313	353	328	331	49	162	29.4	830	51	331		342	299	262	366	354	267	307	282	285	113		800.6	280	722.17
																55	438	373	299	413	393	344	375	377	288	53	193	31.8	833	49	386		383	318	244	358	338	289	320	322	233	140		801.2	337	869.183
																38	408	361	361	403	398	299	372	360	310	53	178	31.8	813	48	349		370	323	323	365	360	261	334	322	272	125		781.2	301	776.333
																46	393	362	329	432	356	348	395	323	296	45	200	27	828	47	346		347	316	283	386	310	302	349	277	250	155		801	299	771.174
																42	384	353	347	396	368	306	401	328	296	62	186	37.2	928	44	361		342	311	305	354	326	264	359	286	254	124		890.8	317	817.6
																41	418	385	355	438	380	341	373	361	315	44	204	26.4	850	49	343		377	344	314	397	339	300	332	320	274	160		823.6	294	758.278
																54	392	386	368	387	391	319	383	334	348	54	186	32.4	854	44	368		338	332	314	333	337	265	329	280	294	132		821.6	324	835.654
																46	397	389	335	431	396	304	394	367	318	51	198	30.6	835	48	355		351	343	289	385	350	258	348	321	272	147		804.4	307	791.808
																45	401	361	320	389	367	328	412	367	270	48	215	28.8	833	54	366		356	316	275	344	322	283	367	322	225	167		804.2	312	804.704
																41	406	367	288	407	435	316	395	329	321	46	201	27.6	806	48	344		365	326	247	366	394	275	354	288	280	155		778.4	296	763.437
																46	391	386	362	365	394	338	360	322	323	55	186	33	785	44	381		345	340	316	319	348	292	314	276	277	131		752	337	869.183
																50	441	358	349	353	403	341	367	341	298	49	197	29.4	783	33	347		391	308	299	303	353	291	317	291	248	148		753.6	314	809.862
																29	408	376	343	398	366	327	395	324	329	49	205	29.4	887	61	311		379	347	314	369	337	298	366	295	300	156		857.6	250	644.795
																45	398	377	323	429	382	371	363	352	318	54	196	32.4	842	47	335		353	332	278	384	337	326	318	307	273	142		809.6	288	742.803
																56	423	369	331	400	369	334	370	355	311	47	193	28.2	838	56	361		367	313	275	344	313	278	314	299	255	146		809.8	305	786.649
																43	437	382	331	390	398	321	408	358	296	50	206	30	873	48	375		394	339	288	347	355	278	365	315	253	156		843	327	843.391
																55	388	395	350	380	366	307	378	307	315	47	176	28.2	857	46	343		333	340	295	325	311	252	323	252	260	129		828.8	297	766.016
																47	437	369	304	405	352	326	368	322	306	53	170	31.8	855	61	358		390	322	257	358	305	279	321	275	259	117		823.2	297	766.016
																55	403	406	347	377	382	334	382	357	317	57	172	34.2	835	69	338		348	351	292	322	327	279	327	302	262	115		800.8	269	693.799
																60	373	386	327	384	384	316	398	342	309	46	195	27.6	825	40	342		313	326	267	324	324	256	338	282	249	149		797.4	302	778.912
																58	435	383	326	355	363	322	425	333	313	38	208	22.8	830	45	342		377	325	268	297	305	264	367	275	255	170		807.2	297	766.016
																56	407	336	320	414	380	307	385	345	334	50	174	30	811	53	333		351	280	264	358	324	251	329	289	278	124		781	280	722.17
																49	410	362	311	421	362	296	392	408	306	39	170	23.4	808	41	351		361	313	262	372	313	247	343	359	257	131		784.6	310	799.545
																55	428	364	337	475	371	298	395	371	303	42	190	25.2	805	41	362		373	309	282	420	316	243	340	316	248	148		779.8	321	827.916
																52	400	360	348	373	372	316	379	333	320	41	199	24.6	798	53	345		348	308	296	321	320	264	327	281	268	158		773.4	292	753.12
																50	429	406	333	407	353	333	386	316	322	52	166	31.2	788	51	369		379	356	283	357	303	283	336	266	272	114		756.8	318	820.179
																46	430	379	335	374	375	322	353	326	321	62	205	37.2	879	38	352		384	333	289	328	329	276	307	280	275	143		841.8	314	809.862
																55	418	342	323	414	372	306	369	357	300	43	176	25.8	876	50	351		363	287	268	359	317	251	314	302	245	133		850.2	301	776.333
																43	395	329	322	415	346	327	369	346	323	58	189	34.8	903	55	345		352	286	279	372	303	284	326	303	280	131		868.2	290	747.962
																43	426	369	321	405	371	337	401	386	315	38	207	22.8	790	49	338		383	326	278	362	328	294	358	343	272	169		767.2	289	745.383
																55	393	361	312	406	377	342	356	356	358	44	188	26.4	868	48	368		338	306	257	351	322	287	301	301	303	144		841.6	320	825.337
																47	409	397	311	402	366	301	359	370	318	52	198	31.2	865	50	354		362	350	264	355	319	254	312	323	271	146		833.8	304	784.07
																39	401	363	332	403	354	326	353	384	315	45	190	27	880	51	364		362	324	293	364	315	287	314	345	276	145		853	313	807.283
																49	418	387	321	348	383	311	373	344	289	35	210	21	829	52	349		369	338	272	299	334	262	324	295	240	175		808	297	766.016
																44	382	362	323	404	349	333	413	341	321	59	188	35.4	842	51	297		338	318	279	360	305	289	369	297	277	129		806.6	246	634.478
																45	405	344	346	422	353	306	392	325	316	50	161	30	854	62	316		360	299	301	377	308	261	347	280	271	111		824	254	655.111
																55	380	379	283	394	365	349	387	336	309	44	181	26.4	847	43	371		325	324	228	339	310	294	332	281	254	137		820.6	328	845.971
																41	395	378	311	381	351	317	360	337	300	48	215	28.8	890	40	323		354	337	270	340	310	276	319	296	259	167		861.2	283	729.907
																46	407	357	350	373	364	314	393	371	292	54	177	32.4	825	45	354		361	311	304	327	318	268	347	325	246	123		792.6	309	796.966
																48	421	357	318	397	370	302	374	345	314	59	176	35.4	849	41	361		373	309	270	349	322	254	326	297	266	117		813.6	320	825.337
																46	372	350	310	402	402	306	408	339	282	50	186	30	852	65	342		326	304	264	356	356	260	362	293	236	136		822	277	714.432
																36	397	371	331	366	362	341	404	327	314	48	170	28.8	854	39	351		361	335	295	330	326	305	368	291	278	122		825.2	312	804.704
																41	401	358	324	369	372	301	353	314	327	45	181	27	832	34	372		360	317	283	328	331	260	312	273	286	136		805	338	871.762
																42	420	344	348	368	393	332	374	328	330	46	175	27.6	828	54	316		378	302	306	326	351	290	332	286	288	129		800.4	262	675.745
																38	374	370	336	381	384	326	385	339	322	43	185	25.8	845	50	293		336	332	298	343	346	288	347	301	284	142		819.2	243	626.74
																57	457	353	325	382	367	316	362	355	306	39	192	23.4	822	53	367		400	296	268	325	310	259	305	298	249	153		798.6	314	809.862
																49	406	388	320	359	367	324	398	350	284	45	191	27	848	55	386		357	339	271	310	318	275	349	301	235	146		821	331	853.708
																48	390	402	313	390	389	318	353	374	302	40	186	24	838	56	320		342	354	265	342	341	270	305	326	254	146		814	264	680.903
																45	396	369	346	424	347	311	383	336	321	48	183	28.8	867	40	331		351	324	301	379	302	266	338	291	276	135		838.2	291	750.541
																44	416	367	362	395	359	320	358	366	320	47	174	28.2	861	46	328		372	323	318	351	315	276	314	322	276	127		832.8	282	727.328
																46	409	382	286	407	396	316	352	365	336	41	188	24.6	806	47	383		363	336	240	361	350	270	306	319	290	147		781.4	336	866.604
																43	407	313	302	360	362	317	380	354	297	54	196	32.4	837	56	353		364	270	259	317	319	274	337	311	254	142		804.6	297	766.016
																47	444	356	310	422	377	316	392	352	302	50	179	30	840	37	371		397	309	263	375	330	269	345	305	255	129		810	334	861.446
																43	440	361	322	402	377	320	386	348	322	37	188	22.2	793	31	359		397	318	279	359	334	277	343	305	279	151		770.8	328	845.971
																43	408	383	349	381	394	299	357	350	298	52	196	31.2	811	47	377		365	340	306	338	351	256	314	307	255	144		779.8	330	851.129
																59	365	349	312	424	408	309	371	373	300	50	200	30	787	53	335		306	290	253	365	349	250	312	314	241	150		757	282	727.328
																56	415	366	316	403	372	323	351	340	334	55	176	33	836	48	341		359	310	260	347	316	267	295	284	278	121		803	293	755.699
																59	416	375	326	437	341	344	398	378	300	40	180	24	852	47	350		357	316	267	378	282	285	339	319	241	140		828	303	781.491
																41	402	381	353	396	388	301	369	323	334	48	183	28.8	862	49	344		361	340	312	355	347	260	328	282	293	135		833.2	295	760.858
																37	435	328	304	384	407	316	372	335	292	60	226	36	850	45	324		398	291	267	347	370	279	335	298	255	166		814	279	719.591
																40	395	362	325	393	379	281	369	342	305	57	186	34.2	849	41	366		355	322	285	353	339	241	329	302	265	129		814.8	325	838.233
																41	398	356	318	385	351	357	391	356	297	39	173	23.4	854	53	378		357	315	277	344	310	316	350	315	256	134		830.6	325	838.233
																55	386	361	327	378	397	303	390	332	293	55	179	33	812	38	349		331	306	272	323	342	248	335	277	238	124		779	311	802.124
																49	409	351	301	385	384	310	357	346	326	41	174	24.6	862	43	311		360	302	252	336	335	261	308	297	277	133		837.4	268	691.22
																54	400	375	340	392	391	298	367	368	314	45	223	27	838	49	313		346	321	286	338	337	244	313	314	260	178		811	264	680.903
																43	401	388	321	408	416	301	374	348	318	49	185	29.4	817	48	361		358	345	278	365	373	258	331	305	275	136		787.6	313	807.283
																50	429	369	318	374	332	317	371	360	313	53	178	31.8	787	39	360		379	319	268	324	282	267	321	310	263	125		755.2	321	827.916
																51	408	357	293	383	376	308	417	310	334	44	178	26.4	840	56	346		357	306	242	332	325	257	366	259	283	134		813.6	290	747.962
																41	371	386	328	395	374	324	370	337	299	42	195	25.2	852	51	327		330	345	287	354	333	283	329	296	258	153		826.8	276	711.853
																41	432	364	290	397	330	313	399	377	257	53	190	31.8	850	46	343		391	323	249	356	289	272	358	336	216	137		818.2	297	766.016
																35	413	378	314	378	379	317	360	350	317	59	196	35.4	826	48	336		378	343	279	343	344	282	325	315	282	137		790.6	288	742.803
																45	416	370	321	409	381	339	400	360	307	49	180	29.4	763	48	348		371	325	276	364	336	294	355	315	262	131		733.6	300	773.754
																42	400	333	296	364	364	314	399	352	316	35	183	21	845	47	309		358	291	254	322	322	272	357	310	274	148		824	262	675.745
																36	419	352	308	409	383	313	388	345	294	29	173	17.4	822	59	351		383	316	272	373	347	277	352	309	258	144		804.6	292	753.12
																35	415	382	297	389	360	317	404	323	316	50	177	30	785	44	367		380	347	262	354	325	282	369	288	281	127		755	323	833.075
																45	410	385	329	375	401	310	400	330	299	39	168	23.4	871	33	324		365	340	284	330	356	265	355	285	254	129		847.6	291	750.541
																42	376	335	320	345	365	337	380	356	290	49	175	29.4	807	62	335		334	293	278	303	323	295	338	314	248	126		777.6	273	704.116
																45	388	357	361	399	374	309	391	321	305	34	169	20.4	797	44	338		343	312	316	354	329	264	346	276	260	135		776.6	294	758.278
																51	386	379	322	411	365	346	360	332	298	36	191	21.6	856	42	323		335	328	271	360	314	295	309	281	247	155		834.4	281	724.749
																45	411	364	340	422	402	338	394	364	316	53	155	31.8	845	47	378		366	319	295	377	357	293	349	319	271	102		813.2	331	853.708
																43	397	371	329	407	353	307	376	362	293	42	172	25.2	823	35	331		354	328	286	364	310	264	333	319	250	130		797.8	296	763.437
																48	380	337	363	394	363	334	349	297	316	45	196	27	836	46	342		332	289	315	346	315	286	301	249	268	151		809	296	763.437
																46	401	379	317	335	397	340	373	345	336	50	187	30	773	40	348		355	333	271	289	351	294	327	299	290	137		743	308	794.387
																35	406	326	321	397	371	332	402	335	310	56	179	33.6	790	45	342		371	291	286	362	336	297	367	300	275	123		756.4	297	766.016
																55	392	373	317	380	361	330	360	364	312	51	200	30.6	817	33	340		337	318	262	325	306	275	305	309	257	149		786.4	307	791.808
																47	395	358	316	392	368	310	379	359	342	47	185	28.2	836	33	349		348	311	269	345	321	263	332	312	295	138		807.8	316	815.02
																38	369	411	325	392	406	351	387	347	304	36	182	21.6	826	55	345		331	373	287	354	368	313	349	309	266	146		804.4	290	747.962
																60	426	349	304	390	376	295	352	377	326	31	204	18.6	839	46	345		366	289	244	330	316	235	292	317	266	173		820.4	299	771.174
																53	397	347	348	367	410	314	362	320	294	44	183	26.4	795	47	309		344	294	295	314	357	261	309	267	241	139		768.6	262	675.745
																56	390	359	309	386	390	315	364	344	292	42	168	25.2	845	37	334		334	303	253	330	334	259	308	288	236	126		819.8	297	766.016
																39	390	345	325	398	390	296	345	346	320	41	177	24.6	833	42	354		351	306	286	359	351	257	306	307	281	136		808.4	312	804.704
																47	379	362	321	403	367	324	371	339	300	39	195	23.4	823	45	327		332	315	274	356	320	277	324	292	253	156		799.6	282	727.328
																38	381	354	352	392	365	334	376	349	309	47	179	28.2	859	40	313		343	316	314	354	327	296	338	311	271	132		830.8	273	704.116
																41	409	367	335	413	346	295	367	361	344	59	202	35.4	776	53	309		368	326	294	372	305	254	326	320	303	143		740.6	256	660.27
																43	408	391	336	407	372	324	397	338	287	34	184	20.4	856	52	320		365	348	293	364	329	281	354	295	244	150		835.6	268	691.22
																43	371	347	332	388	378	302	348	305	285	39	183	23.4	876	37	339		328	304	289	345	335	259	305	262	242	144		852.6	302	778.912
																39	435	376	331	384	338	316	403	361	342	55	196	33	802	42	363		396	337	292	345	299	277	364	322	303	141		769	321	827.916
																37	405	363	321	404	368	316	371	371	306	37	184	22.2	816	40	347		368	326	284	367	331	279	334	334	269	147		793.8	307	791.808
																50	385	355	319	405	340	326	392	344	314	56	196	33.6	833	41	370		335	305	269	355	290	276	342	294	264	140		799.4	329	848.55
																54	413	358	309	393	373	346	378	360	320	46	150	27.6	844	45	309		359	304	255	339	319	292	324	306	266	104		816.4	264	680.903
																41	416	353	301	339	318	299	395	316	343	48	179	28.8	820	49	324		375	312	260	298	277	258	354	275	302	131		791.2	275	709.274
																51	389	371	338	404	374	300	353	337	305	48	184	28.8	829	52	371		338	320	287	353	323	249	302	286	254	136		800.2	319	822.758
																44	388	351	306	405	407	312	376	329	283	41	206	24.6	780	40	330		344	307	262	361	363	268	332	285	239	165		755.4	290	747.962
																48	390	390	308	373	375	314	395	325	291	38	185	22.8	836	42	347		342	342	260	325	327	266	347	277	243	147		813.2	305	786.649
																43	399	370	315	400	375	323	389	342	305	48	216	28.8	817	40	339		356	327	272	357	332	280	346	299	262	168		788.2	299	771.174
																38	436	369	297	361	393	308	375	347	344	49	177	29.4	800	51	328		398	331	259	323	355	270	337	309	306	128		770.6	277	714.432
																46	358	342	301	381	354	327	377	340	293	50	161	30	835	41	310		312	296	255	335	308	281	331	294	247	111		805	269	693.799
																48	427	341	338	395	383	333	361	363	332	40	168	24	836	36	325		379	293	290	347	335	285	313	315	284	128		812	289	745.383
																36	414	352	300	371	347	338	378	343	306	40	176	24	834	38	355		378	316	264	335	311	302	342	307	270	136		810	317	817.6
																39	425	359	313	410	377	348	404	354	309	43	187	25.8	803	34	328		386	320	274	371	338	309	365	315	270	144		777.2	294	758.278
																51	388	349	337	383	361	320	380	322	310	36	175	21.6	873	49	342		337	298	286	332	310	269	329	271	259	139		851.4	293	755.699
																39	406	353	306	401	342	322	371	356	324	51	197	30.6	775	49	310		367	314	267	362	303	283	332	317	285	146		744.4	261	673.166
																36	393	369	358	382	338	340	366	336	324	50	197	30	765	46	343		357	333	322	346	302	304	330	300	288	147		735	297	766.016
																46	399	348	332	417	333	320	374	383	325	49	191	29.4	854	43	334		353	302	286	371	287	274	328	337	279	142		824.6	291	750.541
																45	364	401	328	396	359	323	382	324	300	33	195	19.8	844	38	326		319	356	283	351	314	278	337	279	255	162		824.2	288	742.803
																44	414	364	315	423	390	312	354	309	310	49	202	29.4	841	48	338		370	320	271	379	346	268	310	265	266	153		811.6	290	747.962
																40	439	364	316	369	382	287	406	302	335	38	184	22.8	818	42	348		399	324	276	329	342	247	366	262	295	146		795.2	306	789.229
																44	396	374	320	376	354	326	372	352	292	45	187	27	871	41	348		352	330	276	332	310	282	328	308	248	142		844	307	791.808
																46	385	357	342	385	397	331	406	339	300	36	182	21.6	822	36	320		339	311	296	339	351	285	360	293	254	146		800.4	284	732.487
																42	375	373	292	414	341	330	411	337	286	36	205	21.6	808	40	363		333	331	250	372	299	288	369	295	244	169		786.4	323	833.075
																43	417	352	322	404	376	332	380	326	320	39	171	23.4	824	31	328		374	309	279	361	333	289	337	283	277	132		800.6	297	766.016
																35	392	375	285	390	359	300	392	328	291	41	160	24.6	807	47	328		357	340	250	355	324	265	357	293	256	119		782.4	281	724.749
																42	391	377	302	372	370	305	388	312	329	46	160	27.6	793	47	319		349	335	260	330	328	263	346	270	287	114		765.4	272	701.537
																52	396	352	344	396	393	286	403	352	346	36	179	21.6	808	42	315		344	300	292	344	341	234	351	300	294	143		786.4	273	704.116
																30	389	372	328	402	399	316	402	368	307	46	183	27.6	884	41	308		359	342	298	372	369	286	372	338	277	137		856.4	267	688.641
																49	396	349	328	395	377	315	398	340	294	34	175	20.4	781	52	337		347	300	279	346	328	266	349	291	245	141		760.6	285	735.066
																49	422	400	324	404	381	320	381	362	324	40	167	24	804	33	317		373	351	275	355	332	271	332	313	275	127		780	284	732.487
																31	399	377	311	355	368	307	419	330	299	43	197	25.8	779	53	328		368	346	280	324	337	276	388	299	268	154		753.2	275	709.274
																32	374	362	299	394	384	291	356	350	313	33	189	19.8	829	38	313		342	330	267	362	352	259	324	318	281	156		809.2	275	709.274
																41	397	381	341	387	430	325	391	308	321	53	176	31.8	807	39	322		356	340	300	346	389	284	350	267	280	123		775.2	283	729.907
																42	395	324	333	409	402	341	387	319	302	42	169	25.2	798	42	319		353	282	291	367	360	299	345	277	260	127		772.8	277	714.432
																43	430	376	294	359	415	305	384	341	326	45	195	27	829	49	327		387	333	251	316	372	262	341	298	283	150		802	278	717.012
																36	415	320	300	403	376	328	376	326	303	32	187	19.2	864	43	306		379	284	264	367	340	292	340	290	267	155		844.8	263	678.324
																31	399	389	353	385	349	327	372	354	321	32	181	19.2	811	38	322		368	358	322	354	318	296	341	323	290	149		791.8	284	732.487
																49	414	351	326	410	393	302	374	368	305	41	197	24.6	804	33	332		365	302	277	361	344	253	325	319	256	156		779.4	299	771.174
																41	427	354	322	426	383	327	379	321	356	38	155	22.8	737	39	371		386	313	281	385	342	286	338	280	315	117		714.2	332	856.287
																38	413	357	349	378	401	319	382	364	320	29	173	17.4	834	45	377		375	319	311	340	363	281	344	326	282	144		816.6	332	856.287
																41	426	386	340	388	369	333	362	353	322	42	183	25.2	811	38	335		385	345	299	347	328	292	321	312	281	141		785.8	297	766.016
																38	433	363	313	395	401	321	361	337	322	36	181	21.6	839	36	320		395	325	275	357	363	283	323	299	284	145		817.4	284	732.487
																42	383	392	335	372	398	314	370	353	301	41	182	24.6	842	35	344		341	350	293	330	356	272	328	311	259	141		817.4	309	796.966
																40	386	336	313	375	353	331	410	347	322	39	189	23.4	805	31	317		346	296	273	335	313	291	370	307	282	150		781.6	286	737.645
																38	395	365	306	443	376	319	374	348	337	46	174	27.6	795	36	336		357	327	268	405	338	281	336	310	299	128		767.4	300	773.754
																49	406	355	330	390	343	335	360	355	335	39	163	23.4	812	30	343		357	306	281	341	294	286	311	306	286	124		788.6	313	807.283
																41	412	348	303	359	372	325	382	351	285	44	172	26.4	822	38	311		371	307	262	318	331	284	341	310	244	128		795.6	273	704.116
																29	410	324	318	383	387	332	358	324	321	36	187	21.6	847	32	320		381	295	289	354	358	303	329	295	292	151		825.4	288	742.803
																45	430	372	318	412	373	328	425	319	316	39	187	23.4	792	42	324		385	327	273	367	328	283	380	274	271	148		768.6	282	727.328
																33	372	375	330	435	390	319	386	359	320	43	161	25.8	780	35	322		339	342	297	402	357	286	353	326	287	118		754.2	287	740.224
																57	432	396	357	413	379	344	389	360	289	36	190	21.6	857	36	343		375	339	300	356	322	287	332	303	232	154		835.4	307	791.808
																31	396	391	311	393	376	322	387	343	303	51	186	30.6	792	25	317		365	360	280	362	345	291	356	312	272	135		761.4	292	753.12
																34	414	362	335	408	387	309	368	342	281	33	163	19.8	842	40	331		380	328	301	374	353	275	334	308	247	130		822.2	291	750.541
																31	383	356	333	386	371	310	407	319	294	45	165	27	829	40	293		352	325	302	355	340	279	376	288	263	120		802	253	652.532
																41	397	391	328	374	378	308	360	321	285	47	182	28.2	824	37	328		356	350	287	333	337	267	319	280	244	135		795.8	291	750.541
																44	417	389	320	366	385	324	387	334	291	26	189	15.6	795	44	324		373	345	276	322	341	280	343	290	247	163		779.4	280	722.17
																35	444	370	300	372	380	325	369	343	294	48	157	28.8	851	39	345		409	335	265	337	345	290	334	308	259	109		822.2	306	789.229
																45	460	351	311	412	367	338	386	340	293	48	166	28.8	839	41	319		415	306	266	367	322	293	341	295	248	118		810.2	278	717.012
																44	376	400	336	384	370	316	370	303	307	45	163	27	839	31	320		332	356	292	340	326	272	326	259	263	118		812	289	745.383
																34	429	346	317	390	403	327	392	345	327	38	192	22.8	817	34	352		395	312	283	356	369	293	358	311	293	154		794.2	318	820.179
																38	421	352	324	431	391	335	428	351	325	53	202	31.8	831	27	356		383	314	286	393	353	297	390	313	287	149		799.2	329	848.55
																46	381	335	340	403	371	337	379	380	323	39	171	23.4	812	48	316		335	289	294	357	325	291	333	334	277	132		788.6	268	691.22
																43	406	337	321	382	381	347	379	346	325	44	160	26.4	854	44	313		363	294	278	339	338	304	336	303	282	116		827.6	269	693.799
																36	410	360	321	377	365	335	383	346	318	40	176	24	868	53	332		374	324	285	341	329	299	347	310	282	136		844	279	719.591
																47	414	365	335	377	343	308	388	347	327	40	167	24	842	41	325		367	318	288	330	296	261	341	300	280	127		818	284	732.487
																41	401	402	326	388	394	341	421	363	316	41	185	24.6	818	33	339		360	361	285	347	353	300	380	322	275	144		793.4	306	789.229
																47	463	341	309	418	364	316	406	334	329	39	178	23.4	828	39	349		416	294	262	371	317	269	359	287	282	139		804.6	310	799.545
																36	415	354	344	409	340	345	436	340	329	44	173	26.4	841	41	302		379	318	308	373	304	309	400	304	293	129		814.6	261	673.166
																39	421	336	308	430	371	334	394	339	325	34	173	20.4	819	41	371		382	297	269	391	332	295	355	300	286	139		798.6	330	851.129
																48	402	354	344	386	372	349	432	334	311	35	203	21	850	40	343		354	306	296	338	324	301	384	286	263	168		829	303	781.491
																47	425	393	305	371	356	356	356	347	335	41	187	24.6	850	44	372		378	346	258	324	309	309	309	300	288	146		825.4	328	845.971
																52	403	381	315	418	359	348	421	366	318	31	196	18.6	856	40	347		351	329	263	366	307	296	369	314	266	165		837.4	307	791.808
																43	479	375	332	381	400	314	360	350	323	30	198	18	794	27	361		436	332	289	338	357	271	317	307	280	168		776	334	861.446
																35	397	428	320	375	401	342	359	363	343	29	190	17.4	801	34	319		362	393	285	340	366	307	324	328	308	161		783.6	285	735.066
																36	398	324	345	400	393	336	410	378	313	39	162	23.4	830	36	337		362	288	309	364	357	300	374	342	277	123		806.6	301	776.333
																40	439	365	337	408	402	329	381	335	335	35	172	21	827	39	347		399	325	297	368	362	289	341	295	295	137		806	308	794.387
																43	406	395	336	374	359	330	369	333	296	39	173	23.4	799	46	345		363	352	293	331	316	287	326	290	253	134		775.6	299	771.174
																45	449	364	335	435	373	296	378	341	307	34	180	20.4	846	40	338		404	319	290	390	328	251	333	296	262	146		825.6	298	768.595
																26	391	354	320	397	404	327	444	339	321	32	165	19.2	848	36	332		365	328	294	371	378	301	418	313	295	133		828.8	296	763.437
																34	430	363	325	388	387	337	415	347	305	32	200	19.2	832	38	320		396	329	291	354	353	303	381	313	271	168		812.8	282	727.328
																34	438	359	363	436	366	327	388	306	323	39	182	23.4	779	37	319		404	325	329	402	332	293	354	272	289	143		755.6	282	727.328
																29	416	389	336	408	411	314	417	345	294	37	183	22.2	818	43	353		387	360	307	379	382	285	388	316	265	146		795.8	310	799.545
																32	403	393	321	393	405	376	400	359	301	41	192	24.6	845	37	364		371	361	289	361	373	344	368	327	269	151		820.4	327	843.391
																36	454	399	355	424	360	320	373	360	337	37	167	22.2	841	34	322		418	363	319	388	324	284	337	324	301	130		818.8	288	742.803
																40	420	352	328	427	365	342	399	353	304	29	181	17.4	815	37	313		380	312	288	387	325	302	359	313	264	152		797.6	276	711.853
																33	432	389	326	400	371	349	372	364	320	32	187	19.2	845	48	305		399	356	293	367	338	316	339	331	287	155		825.8	257	662.849
																43	456	356	339	393	371	349	381	341	316	33	162	19.8	854	38	309		413	313	296	350	328	306	338	298	273	129		834.2	271	698.957
																42	422	373	320	368	372	302	383	383	349	30	161	18	804	31	314		380	331	278	326	330	260	341	341	307	131		786	283	729.907
																35	399	343	344	391	382	323	371	367	317	35	174	21	829	34	336		364	308	309	356	347	288	336	332	282	139		808	302	778.912
																36	398	396	327	444	398	338	418	353	299	44	190	26.4	806	32	348		362	360	291	408	362	302	382	317	263	146		779.6	316	815.02
																44	431	403	372	387	406	346	378	341	324	36	182	21.6	822	41	314		387	359	328	343	362	302	334	297	280	146		800.4	273	704.116
																34	454	377	333	432	384	322	422	369	328	36	190	21.6	809	40	346		420	343	299	398	350	288	388	335	294	154		787.4	306	789.229
																27	392	367	300	428	355	367	405	357	324	29	173	17.4	820	42	322		365	340	273	401	328	340	378	330	297	144		802.6	280	722.17
																30	427	379	329	412	383	341	392	370	325	31	195	18.6	860	35	342		397	349	299	382	353	311	362	340	295	164		841.4	307	791.808
																37	414	356	317	411	380	322	373	366	331	33	196	19.8	794	39	341		377	319	280	374	343	285	336	329	294	163		774.2	302	778.912
																35	411	373	346	442	395	353	371	364	304	45	188	27	767	35	366		376	338	311	407	360	318	336	329	269	143		740	331	853.708
																31	470	394	326	413	398	334	373	383	347	39	190	23.4	810	50	322		439	363	295	382	367	303	342	352	316	151		786.6	272	701.537
																39	459	386	331	436	360	306	378	377	320	30	166	18	813	37	314		420	347	292	397	321	267	339	338	281	136		795	277	714.432
																28	404	390	353	417	387	336	409	349	321	23	196	13.8	848	41	301		376	362	325	389	359	308	381	321	293	173		834.2	260	670.586
																47	419	396	363	442	389	333	402	349	316	35	203	21	869	44	336		372	349	316	395	342	286	355	302	269	168		848	292	753.12
																31	401	403	307	382	381	352	438	347	312	38	174	22.8	820	38	347		370	372	276	351	350	321	407	316	281	136		797.2	309	796.966
																34	425	359	310	444	389	308	370	363	283	39	164	23.4	885	39	345		391	325	276	410	355	274	336	329	249	125		861.6	306	789.229
																37	380	408	328	408	411	344	404	339	366	37	188	22.2	786	39	322		343	371	291	371	374	307	367	302	329	151		763.8	283	729.907
																25	418	365	325	425	387	311	400	364	371	24	188	14.4	848	35	336		393	340	300	400	362	286	375	339	346	164		833.6	301	776.333
																44	420	341	357	428	351	312	412	365	340	30	184	18	773	39	340		376	297	313	384	307	268	368	321	296	154		755	301	776.333
																35	413	386	309	402	388	345	405	371	356	33	171	19.8	822	44	321		378	351	274	367	353	310	370	336	321	138		802.2	277	714.432
																41	412	360	348	428	423	327	373	377	325	27	155	16.2	846	23	316		371	319	307	387	382	286	332	336	284	128		829.8	293	755.699
																49	450	388	344	425	420	379	353	365	331	40	199	24	822	42	336		401	339	295	376	371	330	304	316	282	159		798	294	758.278
																36	405	374	355	414	408	322	395	371	324	30	141	18	753	30	334		369	338	319	378	372	286	359	335	288	111		735	304	784.07
																45	413	362	318	419	411	339	389	411	349	42	175	25.2	864	34	323		368	317	273	374	366	294	344	366	304	133		838.8	289	745.383
																39	396	345	324	408	403	363	413	375	316	31	204	18.6	836	32	324		357	306	285	369	364	324	374	336	277	173		817.4	292	753.12
																39	484	378	342	416	409	323	431	391	334	34	155	20.4	880	33	333		445	339	303	377	370	284	392	352	295	121		859.6	300	773.754
																40	399	377	348	472	402	358	426	342	308	24	186	14.4	801	29	336		359	337	308	432	362	318	386	302	268	162		786.6	307	791.808
																43	440	411	354	401	412	318	418	373	362	33	186	19.8	871	34	317		397	368	311	358	369	275	375	330	319	153		851.2	283	729.907
																38	449	359	345	442	426	338	421	352	320	34	164	20.4	891	26	336		411	321	307	404	388	300	383	314	282	130		870.6	310	799.545
																38	456	400	336	441	424	361	439	379	327	40	173	24	781	32	319		418	362	298	403	386	323	401	341	289	133		757	287	740.224
																33	420	371	348	406	399	308	441	361	314	22	167	13.2	870	39	331		387	338	315	373	366	275	408	328	281	145		856.8	292	753.12
																33	429	402	355	413	420	343	440	356	337	29	192	17.4	838	37	329		396	369	322	380	387	310	407	323	304	163		820.6	292	753.12
																40	404	393	351	416	400	350	417	372	369	27	202	16.2	861	32	345		364	353	311	376	360	310	377	332	329	175		844.8	313	807.283
																30	414	411	356	452	369	362	405	357	370	29	199	17.4	917	28	347		384	381	326	422	339	332	375	327	340	170		899.6	319	822.758
																39	448	410	381	396	441	340	396	412	315	34	194	20.4	846	30	360		409	371	342	357	402	301	357	373	276	160		825.6	330	851.129
																27	481	411	327	456	379	384	422	369	350	42	178	25.2	824	31	350		454	384	300	429	352	357	395	342	323	136		798.8	319	822.758
																30	483	380	345	473	410	354	429	377	335	39	191	23.4	835	43	321		453	350	315	443	380	324	399	347	305	152		811.6	278	717.012
																26	432	377	361	458	411	373	412	394	353	26	177	15.6	864	29	311		406	351	335	432	385	347	386	368	327	151		848.4	282	727.328
																34	466	415	392	452	413	316	429	421	361	34	208	20.4	828	42	345		432	381	358	418	379	282	395	387	327	174		807.6	303	781.491
																35	473	413	382	484	398	340	415	416	367	29	172	17.4	864	28	383		438	378	347	449	363	305	380	381	332	143		846.6	355	915.608
																30	445	402	359	451	463	350	465	434	344	20	189	12	813	41	345		415	372	329	421	433	320	435	404	314	169		801	304	784.07
																44	471	461	378	465	441	362	428	365	375	30	220	18	802	35	361		427	417	334	421	397	318	384	321	331	190		784	326	840.812
																24	449	416	420	467	434	379	434	367	357	31	189	18.6	904	32	359		425	392	396	443	410	355	410	343	333	158		885.4	327	843.391
																29	437	451	363	440	394	365	465	370	406	29	189	17.4	884	35	391		408	422	334	411	365	336	436	341	377	160		866.6	356	918.187
																36	462	417	389	402	410	378	480	391	373	27	196	16.2	904	25	370		426	381	353	366	374	342	444	355	337	169		887.8	345	889.817
																30	490	414	375	454	451	399	451	377	360	37	198	22.2	871	34	353		460	384	345	424	421	369	421	347	330	161		848.8	319	822.758
																42	485	433	350	476	430	375	430	396	339	29	192	17.4	878	31	326		443	391	308	434	388	333	388	354	297	163		860.6	295	760.858
																36	465	404	387	470	438	358	475	417	401	32	212	19.2	847	33	370		429	368	351	434	402	322	439	381	365	180		827.8	337	869.183
																39	505	425	401	498	449	404	452	408	364	30	193	18	858	34	339		466	386	362	459	410	365	413	369	325	163		840	305	786.649
																40	472	404	428	496	450	380	450	438	390	33	211	19.8	886	40	337		432	364	388	456	410	340	410	398	350	178		866.2	297	766.016
																20	507	435	394	460	435	378	496	444	392	36	218	21.6	870	30	358		487	415	374	440	415	358	476	424	372	182		848.4	328	845.971
																27	488	431	399	480	485	379	483	409	361	17	165	10.2	883	37	384		461	404	372	453	458	352	456	382	334	148		872.8	347	894.975
																45	514	493	402	534	470	390	486	437	401	31	199	18.6	884	32	389		469	448	357	489	425	345	441	392	356	168		865.4	357	920.767
																32	516	470	421	526	479	398	495	404	394	32	215	19.2	972	37	347		484	438	389	494	447	366	463	372	362	183		952.8	310	799.545
																40	557	483	450	505	480	432	522	463	408	35	212	21	864	33	372		517	443	410	465	440	392	482	423	368	177		843	339	874.341
																29	574	473	446	533	494	409	518	472	437	38	200	22.8	947	28	396		545	444	417	504	465	380	489	443	408	162		924.2	368	949.138
																28	544	518	451	558	529	449	532	441	445	44	204	26.4	971	23	393		516	490	423	530	501	421	504	413	417	160		944.6	370	954.296
																37	595	512	490	573	511	410	548	494	453	32	188	19.2	911	25	366		558	475	453	536	474	373	511	457	416	156		891.8	341	879.5
																18	579	525	445	587	535	423	579	490	454	26	209	15.6	983	35	360		561	507	427	569	517	405	561	472	436	183		967.4	325	838.233
																29	598	582	486	573	518	489	546	486	510	35	212	21	951	39	402		569	553	457	544	489	460	517	457	481	177		930	363	936.242
																33	676	569	497	606	576	458	552	549	465	29	205	17.4	1011	37	435		643	536	464	573	543	425	519	516	432	176		993.6	398	1026.51
																37	658	556	478	593	561	486	583	501	437	42	204	25.2	1006	24	389		621	519	441	556	524	449	546	464	400	162		980.8	365	941.4
																35	636	570	497	651	527	518	581	500	493	33	189	19.8	1018	29	425		601	535	462	616	492	483	546	465	458	156		998.2	396	1021.35
																36	633	585	503	635	575	477	589	534	465	25	204	15	1028	26	388		597	549	467	599	539	441	553	498	429	179		1013	362	933.663
																34	653	611	509	667	587	486	656	540	471	37	192	22.2	1047	41	447		619	577	475	633	553	452	622	506	437	155		1024.8	406	1047.15
																35	682	574	528	642	585	499	620	582	494	34	201	20.4	1056	37	433		647	539	493	607	550	464	585	547	459	167		1035.6	396	1021.35
																36	667	578	531	640	590	572	654	589	492	27	234	16.2	1024	30	390		631	542	495	604	554	536	618	553	456	207		1007.8	360	928.504
																30	660	575	561	669	584	500	627	529	534	17	226	10.2	1008	35	400		630	545	531	639	554	470	597	499	504	209		997.8	365	941.4
																22	646	642	528	619	628	508	614	558	504	36	220	21.6	1056	35	410		624	620	506	597	606	486	592	536	482	184		1034.4	375	967.192
																36	673	583	555	677	604	553	608	556	505	18	220	10.8	1099	40	421		637	547	519	641	568	517	572	520	469	202		1088.2	381	982.667
																36	673	570	522	658	597	529	603	555	537	32	204	19.2	1017	28	408		637	534	486	622	561	493	567	519	501	172		997.8	380	980.088
																29	677	562	494	683	625	506	626	552	477	39	226	23.4	1013	34	396		648	533	465	654	596	477	597	523	448	187		989.6	362	933.663
																37	618	586	489	670	590	536	601	547	466	31	221	18.6	1065	24	438		581	549	452	633	553	499	564	510	429	190		1046.4	414	1067.78
																38	662	634	480	654	577	537	597	568	497	30	205	18	1039	44	424		624	596	442	616	539	499	559	530	459	175		1021	380	980.088
																35	659	520	533	670	568	493	596	512	461	31	209	18.6	980	29	406		624	485	498	635	533	458	561	477	426	178		961.4	377	972.35
																30	659	602	516	576	600	457	628	543	474	31	215	18.6	982	38	413		629	572	486	546	570	427	598	513	444	184		963.4	375	967.192
																26	640	579	491	597	563	485	551	532	486	35	217	21	1011	42	411		614	553	465	571	537	459	525	506	460	182		990	369	951.717
																38	631	584	478	625	519	498	601	548	483	29	228	17.4	1005	28	369		593	546	440	587	481	460	563	510	445	199		987.6	341	879.5
																28	621	527	491	610	612	506	606	537	459	29	201	17.4	1086	30	388		593	499	463	582	584	478	578	509	431	172		1068.6	358	923.346
																28	649	581	509	586	586	459	525	527	479	30	208	18	971	24	377		621	553	481	558	558	431	497	499	451	178		953	353	910.45
																21	635	524	453	601	607	483	546	524	452	39	224	23.4	978	26	391		614	503	432	580	586	462	525	503	431	185		954.6	365	941.4
																31	634	551	491	608	546	461	552	532	453	36	201	21.6	908	39	408		603	520	460	577	515	430	521	501	422	165		886.4	369	951.717
																36	579	534	455	544	540	478	572	478	428	38	192	22.8	1004	43	378		543	498	419	508	504	442	536	442	392	154		981.2	335	864.025
																28	575	535	452	596	517	490	548	479	460	41	234	24.6	1020	43	415		547	507	424	568	489	462	520	451	432	193		995.4	372	959.454
																24	578	550	486	586	537	456	563	495	470	28	208	16.8	1003	28	358		554	526	462	562	513	432	539	471	446	180		986.2	330	851.129
																29	609	550	493	592	483	484	519	499	438	28	203	16.8	956	29	389		580	521	464	563	454	455	490	470	409	175		939.2	360	928.504
																25	567	546	498	598	529	472	608	491	441	42	183	25.2	999	37	396		542	521	473	573	504	447	583	466	416	141		973.8	359	925.925
																30	534	514	466	568	499	411	531	447	461	26	226	15.6	985	36	336		504	484	436	538	469	381	501	417	431	200		969.4	300	773.754
																21	578	513	463	566	507	441	532	481	401	26	198	15.6	907	38	375		557	492	442	545	486	420	511	460	380	172		891.4	337	869.183
																35	599	491	437	548	557	423	532	535	479	33	215	19.8	947	38	377		564	456	402	513	522	388	497	500	444	182		927.2	339	874.341
																27	591	534	439	573	524	448	493	464	397	32	199	19.2	899	38	361		564	507	412	546	497	421	466	437	370	167		879.8	323	833.075
																33	545	503	468	516	564	442	528	475	437	36	204	21.6	926	22	407		512	470	435	483	531	409	495	442	404	168		904.4	385	992.984
																34	570	484	435	533	491	474	554	474	435	35	218	21	988	21	358		536	450	401	499	457	440	520	440	401	183		967	337	869.183
																39	539	516	464	562	487	422	574	462	409	31	198	18.6	957	23	370		500	477	425	523	448	383	535	423	370	167		938.4	347	894.975
																39	554	478	439	525	466	422	491	457	389	33	207	19.8	988	38	387		515	439	400	486	427	383	452	418	350	174		968.2	349	900.133
																33	537	495	445	478	532	417	490	479	412	25	209	15	947	30	394		504	462	412	445	499	384	457	446	379	184		932	364	938.821
																40	563	490	459	578	478	391	543	471	398	24	226	14.4	964	27	362		523	450	419	538	438	351	503	431	358	202		949.6	335	864.025
																33	507	503	433	532	511	424	532	444	395	40	243	24	959	33	336		474	470	400	499	478	391	499	411	362	203		935	303	781.491
																27	576	486	440	525	492	405	499	478	436	22	217	13.2	912	30	377		549	459	413	498	465	378	472	451	409	195		898.8	347	894.975
																28	592	426	438	541	508	422	520	455	403	36	247	21.6	1016	27	377		564	398	410	513	480	394	492	427	375	211		994.4	350	902.712
																33	548	452	433	519	495	428	482	510	387	32	213	19.2	916	34	366		515	419	400	486	462	395	449	477	354	181		896.8	332	856.287
																38	527	474	419	541	477	408	483	440	418	27	216	16.2	971	35	391		489	436	381	503	439	370	445	402	380	189		954.8	356	918.187
																35	507	451	419	505	489	409	503	465	421	20	236	12	899	26	367		472	416	384	470	454	374	468	430	386	216		887	341	879.5
																38	477	453	404	493	448	429	495	442	386	32	227	19.2	889	26	355		439	415	366	455	410	391	457	404	348	195		869.8	329	848.55
																33	512	477	377	534	461	438	456	444	407	30	227	18	920	26	383		479	444	344	501	428	405	423	411	374	197		902	357	920.767
																33	587	483	397	519	433	404	495	440	360	32	231	19.2	943	21	309		554	450	364	486	400	371	462	407	327	199		923.8	288	742.803
																28	490	450	410	529	449	416	528	427	406	30	234	18	958	26	372		462	422	382	501	421	388	500	399	378	204		940	346	892.396
																31	499	462	379	486	428	419	471	424	400	27	224	16.2	977	33	368		468	431	348	455	397	388	440	393	369	197		960.8	335	864.025
																29	524	451	417	448	485	404	486	420	373	28	231	16.8	896	15	350		495	422	388	419	456	375	457	391	344	203		879.2	335	864.025
																23	531	437	440	488	459	380	468	440	381	28	247	16.8	912	36	319		508	414	417	465	436	357	445	417	358	219		895.2	283	729.907
																33	530	446	420	481	445	431	484	427	368	28	230	16.8	876	38	364		497	413	387	448	412	398	451	394	335	202		859.2	326	840.812
																29	468	471	392	480	428	380	435	408	388	40	219	24	873	21	337		439	442	363	451	399	351	406	379	359	179		849	316	815.02
																30	515	451	393	475	466	369	475	427	363	31	220	18.6	892	31	343		485	421	363	445	436	339	445	397	333	189		873.4	312	804.704
																32	526	418	397	528	421	384	462	405	367	29	229	17.4	802	27	336		494	386	365	496	389	352	430	373	335	200		784.6	309	796.966
																39	495	419	355	463	440	391	455	430	339	30	243	18	867	38	378		456	380	316	424	401	352	416	391	300	213		849	340	876.921
																27	472	406	413	494	438	396	464	400	364	26	230	15.6	905	23	384		445	379	386	467	411	369	437	373	337	204		889.4	361	931.083
																31	462	416	366	482	447	368	424	383	370	31	225	18.6	923	24	336		431	385	335	451	416	337	393	352	339	194		904.4	312	804.704
																29	464	448	371	485	435	380	419	424	368	27	215	16.2	916	25	349		435	419	342	456	406	351	390	395	339	188		899.8	324	835.654
																27	540	468	384	481	457	370	485	377	336	32	238	19.2	933	31	324		513	441	357	454	430	343	458	350	309	206		913.8	293	755.699
																33	480	446	341	476	426	370	449	382	349	28	258	16.8	860	35	372		447	413	308	443	393	337	416	349	316	230		843.2	337	869.183
																39	462	442	386	458	460	371	451	404	360	34	197	20.4	914	20	335		423	403	347	419	421	332	412	365	321	163		893.6	315	812.441
																47	486	404	400	466	435	352	441	403	373	30	222	18	902	26	359		439	357	353	419	388	305	394	356	326	192		884	333	858.866
																22	472	408	397	482	417	374	440	390	371	34	228	20.4	872	30	378		450	386	375	460	395	352	418	368	349	194		851.6	348	897.554
																31	477	393	368	492	427	379	448	405	362	25	200	15	931	33	321		446	362	337	461	396	348	417	374	331	175		916	288	742.803
																30	498	422	368	475	418	361	416	391	373	32	192	19.2	908	27	332		468	392	338	445	388	331	386	361	343	160		888.8	305	786.649
																35	435	408	397	490	428	328	434	379	353	36	230	21.6	878	25	371		400	373	362	455	393	293	399	344	318	194		856.4	346	892.396
																32	464	435	341	437	405	339	473	391	332	31	217	18.6	897	32	307		432	403	309	405	373	307	441	359	300	186		878.4	275	709.274
																31	453	412	373	454	387	351	445	358	364	32	196	19.2	844	32	367		422	381	342	423	356	320	414	327	333	164		824.8	335	864.025
																41	456	412	385	470	446	364	450	412	372	46	225	27.6	876	36	375		415	371	344	429	405	323	409	371	331	179		848.4	339	874.341
																30	486	432	395	439	448	359	419	392	369	38	229	22.8	893	39	336		456	402	365	409	418	329	389	362	339	191		870.2	297	766.016
																31	455	439	387	448	439	362	430	418	325	35	234	21	884	29	354		424	408	356	417	408	331	399	387	294	199		863	325	838.233
																25	512	357	349	460	414	350	422	352	360	29	224	17.4	925	36	354		487	332	324	435	389	325	397	327	335	195		907.6	318	820.179
																29	487	396	370	495	452	357	447	361	355	31	195	18.6	851	33	356		458	367	341	466	423	328	418	332	326	164		832.4	323	833.075
																29	452	381	358	447	393	350	418	382	344	33	212	19.8	873	20	362		423	352	329	418	364	321	389	353	315	179		853.2	342	882.079
																19	469	408	347	435	396	349	443	380	356	22	210	13.2	885	36	327		450	389	328	416	377	330	424	361	337	188		871.8	291	750.541
																27	440	394	386	462	394	352	432	369	359	30	203	18	859	34	321		413	367	359	435	367	325	405	342	332	173		841	287	740.224
																34	420	374	368	395	401	357	425	377	326	34	232	20.4	858	24	325		386	340	334	361	367	323	391	343	292	198		837.6	301	776.333
																24	454	391	328	432	384	348	425	333	362	27	228	16.2	851	37	325		430	367	304	408	360	324	401	309	338	201		834.8	288	742.803
																31	432	363	380	437	404	353	391	330	343	34	205	20.4	877	24	342		401	332	349	406	373	322	360	299	312	171		856.6	318	820.179
																29	453	399	363	420	416	379	422	393	379	28	172	16.8	881	22	367		424	370	334	391	387	350	393	364	350	144		864.2	345	889.817
																32	437	391	344	420	373	326	397	363	309	22	172	13.2	835	29	313		405	359	312	388	341	294	365	331	277	150		821.8	284	732.487
																27	401	389	328	428	411	314	387	344	318	20	187	12	880	34	314		374	362	301	401	384	287	360	317	291	167		868	280	722.17
																24	459	359	330	417	370	312	389	332	310	37	191	22.2	852	28	327		435	335	306	393	346	288	365	308	286	154		829.8	299	771.174
																25	416	365	338	448	395	317	403	417	339	25	214	15	820	21	350		391	340	313	423	370	292	378	392	314	189		805	329	848.55
																34	467	400	339	422	400	315	419	369	319	24	187	14.4	859	20	317		433	366	305	388	366	281	385	335	285	163		844.6	297	766.016
																34	449	374	358	425	409	318	420	374	338	37	205	22.2	891	29	321		415	340	324	391	375	284	386	340	304	168		868.8	292	753.12
																34	424	366	344	409	374	340	374	351	326	34	216	20.4	871	20	331		390	332	310	375	340	306	340	317	292	182		850.6	311	802.124
																31	417	350	326	402	395	342	389	348	320	23	185	13.8	829	40	328		386	319	295	371	364	311	358	317	289	162		815.2	288	742.803
																28	404	370	343	404	335	338	393	365	326	26	205	15.6	838	28	339		376	342	315	376	307	310	365	337	298	179		822.4	311	802.124
																23	423	383	284	462	359	303	387	338	321	21	198	12.6	864	28	339		400	360	261	439	336	280	364	315	298	177		851.4	311	802.124
																26	421	394	293	411	401	313	408	337	310	29	182	17.4	832	38	322		395	368	267	385	375	287	382	311	284	153		814.6	284	732.487
																31	396	362	324	393	386	332	378	356	323	25	195	15	846	25	338		365	331	293	362	355	301	347	325	292	170		831	313	807.283
																37	435	355	315	415	393	316	403	355	321	26	207	15.6	882	40	356		398	318	278	378	356	279	366	318	284	181		866.4	316	815.02
																35	400	361	302	407	372	338	370	357	338	26	206	15.6	867	24	320		365	326	267	372	337	303	335	322	303	180		851.4	296	763.437
																33	440	315	323	394	357	320	336	348	301	21	186	12.6	831	26	303		407	282	290	361	324	287	303	315	268	165		818.4	277	714.432
																26	396	324	305	373	357	305	381	345	296	34	216	20.4	859	18	327		370	298	279	347	331	279	355	319	270	182		838.6	309	796.966
																24	377	342	331	395	361	311	371	320	294	25	204	15	836	22	345		353	318	307	371	337	287	347	296	270	179		821	323	833.075
																28	417	388	307	414	357	304	391	328	320	18	185	10.8	824	24	319		389	360	279	386	329	276	363	300	292	167		813.2	295	760.858
																27	409	369	285	404	365	287	381	327	311	24	185	14.4	885	37	328		382	342	258	377	338	260	354	300	284	161		870.6	291	750.541
																32	366	362	323	418	404	289	360	330	332	23	191	13.8	849	24	335		334	330	291	386	372	257	328	298	300	168		835.2	311	802.124
																27	405	337	283	389	374	298	387	335	297	21	207	12.6	831	21	354		378	310	256	362	347	271	360	308	270	186		818.4	333	858.866
																24	400	312	304	423	377	322	371	342	303	17	163	10.2	799	19	355		376	288	280	399	353	298	347	318	279	146		788.8	336	866.604
																17	361	344	285	371	356	307	355	350	288	29	177	17.4	874	27	345		344	327	268	354	339	290	338	333	271	148		856.6	318	820.179
																31	387	343	289	380	336	341	352	313	291	34	181	20.4	791	28	298		356	312	258	349	305	310	321	282	260	147		770.6	270	696.378
																28	372	344	291	336	336	318	377	340	307	31	190	18.6	825	34	343		344	316	263	308	308	290	349	312	279	159		806.4	309	796.966
																29	393	339	284	403	370	303	355	354	305	29	174	17.4	809	20	363		364	310	255	374	341	274	326	325	276	145		791.6	343	884.658
																21	393	341	313	389	368	303	339	320	294	24	176	14.4	818	27	323		372	320	292	368	347	282	318	299	273	152		803.6	296	763.437
																25	381	352	327	349	353	309	327	319	309	24	200	14.4	860	20	299		356	327	302	324	328	284	302	294	284	176		845.6	279	719.591
																30	374	322	307	383	339	293	341	337	296	22	161	13.2	811	28	341		344	292	277	353	309	263	311	307	266	139		797.8	313	807.283
																29	375	308	317	401	327	314	346	324	286	26	188	15.6	848	32	317		346	279	288	372	298	285	317	295	257	162		832.4	285	735.066
																24	385	335	335	345	319	308	325	301	262	27	166	16.2	897	22	345		361	311	311	321	295	284	301	277	238	139		880.8	323	833.075
																26	388	312	302	349	328	284	335	332	258	26	180	15.6	834	32	316		362	286	276	323	302	258	309	306	232	154		818.4	284	732.487
																29	405	316	277	407	333	291	399	303	303	28	182	16.8	868	25	320		376	287	248	378	304	262	370	274	274	154		851.2	295	760.858
																23	359	325	313	365	339	281	338	299	299	22	183	13.2	839	24	311		336	302	290	342	316	258	315	276	276	161		825.8	287	740.224
																26	355	318	296	391	341	281	318	322	290	22	168	13.2	844	21	354		329	292	270	365	315	255	292	296	264	146		830.8	333	858.866
																17	345	337	283	354	322	274	351	320	295	23	181	13.8	855	22	312		328	320	266	337	305	257	334	303	278	158		841.2	290	747.962
																22	342	330	271	371	323	312	361	303	272	33	178	19.8	834	31	326		320	308	249	349	301	290	339	281	250	145		814.2	295	760.858
																26	340	304	267	325	328	315	365	282	302	20	162	12	787	22	350		314	278	241	299	302	289	339	256	276	142		775	328	845.971
																29	311	328	278	364	316	287	361	304	291	22	157	13.2	874	21	322		282	299	249	335	287	258	332	275	262	135		860.8	301	776.333
																30	363	312	287	359	335	273	354	326	276	32	167	19.2	811	37	308		333	282	257	329	305	243	324	296	246	135		791.8	271	698.957
																26	370	315	305	328	306	289	337	292	265	18	176	10.8	809	31	332		344	289	279	302	280	263	311	266	239	158		798.2	301	776.333
																21	365	301	287	368	322	300	320	304	270	24	189	14.4	854	28	325		344	280	266	347	301	279	299	283	249	165		839.6	297	766.016
																28	365	346	263	349	319	281	334	304	273	33	170	19.8	815	29	349		337	318	235	321	291	253	306	276	245	137		795.2	320	825.337
																22	342	331	312	363	361	318	381	307	254	21	177	12.6	891	28	343		320	309	290	341	339	296	359	285	232	156		878.4	315	812.441
																26	347	306	305	377	345	271	332	313	305	28	186	16.8	874	27	341		321	280	279	351	319	245	306	287	279	158		857.2	314	809.862
																23	349	318	285	370	325	259	313	318	264	25	182	15	888	20	344		326	295	262	347	302	236	290	295	241	157		873	324	835.654
																25	377	300	271	321	345	258	322	294	272	30	167	18	950	34	408		352	275	246	296	320	233	297	269	247	137		932	374	964.613
																21	334	307	290	319	331	287	308	307	245	21	171	12.6	910	18	370		313	286	269	298	310	266	287	286	224	150		897.4	352	907.871
																18	364	310	279	331	315	268	329	311	294	32	172	19.2	875	32	394		346	292	261	313	297	250	311	293	276	140		855.8	362	933.663
																26	384	313	285	351	331	294	353	319	271	33	162	19.8	928	21	391		358	287	259	325	305	268	327	293	245	129		908.2	370	954.296
																19	348	324	259	346	285	281	304	325	274	24	157	14.4	948	23	370		329	305	240	327	266	262	285	306	255	133		933.6	347	894.975
																25	346	284	249	344	322	274	332	275	287	25	161	15	993	21	363		321	259	224	319	297	249	307	250	262	136		978	342	882.079
																25	376	286	276	322	307	273	372	305	267	25	174	15	1017	32	372		351	261	251	297	282	248	347	280	242	149		1002	340	876.921
																23	353	316	303	380	326	292	333	301	281	20	165	12	1003	24	402		330	293	280	357	303	269	310	278	258	145		991	378	974.929
																20	350	303	252	313	329	278	339	268	238	32	157	19.2	991	22	432		330	283	232	293	309	258	319	248	218	125		971.8	410	1057.46
																25	384	299	284	328	320	294	324	276	253	24	182	14.4	1036	30	395		359	274	259	303	295	269	299	251	228	158		1021.6	365	941.4
																32	347	303	290	351	320	260	325	296	248	22	153	13.2	991	28	431		315	271	258	319	288	228	293	264	216	131		977.8	403	1039.41
																31	348	316	276	321	330	286	342	288	251	27	166	16.2	1063	23	407		317	285	245	290	299	255	311	257	220	139		1046.8	384	990.404
																25	371	331	295	386	306	264	365	274	258	25	169	15	981	25	367		346	306	270	361	281	239	340	249	233	144		966	342	882.079
																38	327	288	314	346	333	269	321	290	261	23	161	13.8	1025	20	389		289	250	276	308	295	231	283	252	223	138		1011.2	369	951.717
																27	315	276	281	336	334	284	328	303	257	14	176	8.4	995	24	424		288	249	254	309	307	257	301	276	230	162		986.6	400	1031.67
																34	355	311	293	317	304	292	338	319	256	36	169	21.6	973	20	395		321	277	259	283	270	258	304	285	222	133		951.4	375	967.192
																22	344	290	265	317	282	283	323	305	291	30	147	18	1006	26	420		322	268	243	295	260	261	301	283	269	117		988	394	1016.2
																25	326	295	263	370	317	280	317	270	242	19	166	11.4	1038	22	396		301	270	238	345	292	255	292	245	217	147		1026.6	374	964.613
																24	341	296	276	335	328	263	306	285	248	28	170	16.8	967	34	391		317	272	252	311	304	239	282	261	224	142		950.2	357	920.767
																28	329	308	247	313	271	274	298	272	267	27	166	16.2	1012	29	369		301	280	219	285	243	246	270	244	239	139		995.8	340	876.921
																24	342	307	301	321	267	267	327	250	247	21	168	12.6	1019	22	436		318	283	277	297	243	243	303	226	223	147		1006.4	414	1067.78
																16	328	287	305	345	320	256	300	296	284	32	163	19.2	975	21	356		312	271	289	329	304	240	284	280	268	131		955.8	335	864.025
																19	337	289	293	330	292	251	343	278	244	20	167	12	1044	19	385		318	270	274	311	273	232	324	259	225	147		1032	366	943.979
																25	364	286	276	322	309	268	334	260	269	22	152	13.2	986	22	399		339	261	251	297	284	243	309	235	244	130		972.8	377	972.35
																23	342	301	236	318	305	258	316	274	253	18	141	10.8	967	19	404		319	278	213	295	282	235	293	251	230	123		956.2	385	992.984
																23	356	298	272	338	323	252	318	274	226	27	159	16.2	949	28	390		333	275	249	315	300	229	295	251	203	132		932.8	362	933.663
																21	319	301	273	353	309	253	284	273	251	25	159	15	1008	13	391		298	280	252	332	288	232	263	252	230	134		993	378	974.929
																29	333	273	276	342	315	264	317	300	247	21	164	12.6	960	36	376		304	244	247	313	286	235	288	271	218	143		947.4	340	876.921
																21	320	293	272	315	292	256	297	294	240	23	169	13.8	937	25	407		299	272	251	294	271	235	276	273	219	146		923.2	382	985.246
																14	347	275	258	305	345	264	326	281	274	32	151	19.2	962	22	361		333	261	244	291	331	250	312	267	260	119		942.8	339	874.341
																25	325	287	297	315	291	246	308	261	234	24	151	14.4	964	18	366		300	262	272	290	266	221	283	236	209	127		949.6	348	897.554
																18	309	322	274	321	283	249	307	282	270	19	145	11.4	909	27	391		291	304	256	303	265	231	289	264	252	126		897.6	364	938.821
																25	322	305	268	328	292	244	331	281	253	28	174	16.8	941	21	374		297	280	243	303	267	219	306	256	228	146		924.2	353	910.45
																30	344	320	271	308	332	267	341	288	230	16	156	9.6	934	24	408		314	290	241	278	302	237	311	258	200	140		924.4	384	990.404
																19	364	270	258	304	310	259	326	285	256	25	140	15	962	26	345		345	251	239	285	291	240	307	266	237	115		947	319	822.758
																20	317	333	268	329	306	258	305	282	235	24	139	14.4	942	32	350		297	313	248	309	286	238	285	262	215	115		927.6	318	820.179
																18	326	290	239	304	302	231	307	271	258	27	162	16.2	937	18	359		308	272	221	286	284	213	289	253	240	135		920.8	341	879.5
																21	326	274	265	318	293	263	290	285	259	20	149	12	902	25	342		305	253	244	297	272	242	269	264	238	129		890	317	817.6
																14	320	287	245	302	324	249	279	279	248	20	170	12	905	19	347		306	273	231	288	310	235	265	265	234	150		893	328	845.971
																21	339	252	264	326	282	239	289	268	229	22	146	13.2	919	30	350		318	231	243	305	261	218	268	247	208	124		905.8	320	825.337
																20	321	300	256	337	276	239	320	283	270	27	138	16.2	916	23	343		301	280	236	317	256	219	300	263	250	111		899.8	320	825.337
																21	309	301	258	304	291	276	325	250	235	19	175	11.4	906	23	343		288	280	237	283	270	255	304	229	214	156		894.6	320	825.337
																25	294	294	273	319	254	251	306	261	255	20	133	12	956	24	342		269	269	248	294	229	226	281	236	230	113		944	318	820.179
																27	325	292	250	299	259	236	276	270	227	25	150	15	879	30	314		298	265	223	272	232	209	249	243	200	125		864	284	732.487
																21	330	265	243	285	273	265	292	294	262	36	156	21.6	924	27	316		309	244	222	264	252	244	271	273	241	120		902.4	289	745.383
																14	319	316	270	321	280	229	293	287	256	26	175	15.6	899	22	352		305	302	256	307	266	215	279	273	242	149		883.4	330	851.129
																24	301	283	250	345	271	263	308	282	278	33	155	19.8	854	26	320		277	259	226	321	247	239	284	258	254	122		834.2	294	758.278
																21	301	271	257	372	272	261	283	280	243	28	153	16.8	899	34	363		280	250	236	351	251	240	262	259	222	125		882.2	329	848.55
																26	311	276	280	323	261	218	326	274	250	26	183	15.6	904	26	345		285	250	254	297	235	192	300	248	224	157		888.4	319	822.758
																37	325	267	266	340	288	259	311	286	265	32	159	19.2	889	24	335		288	230	229	303	251	222	274	249	228	127		869.8	311	802.124
																22	344	274	264	268	270	230	298	276	223	27	147	16.2	881	31	341		322	252	242	246	248	208	276	254	201	120		864.8	310	799.545
																26	338	300	261	318	297	252	330	258	261	13	153	7.8	881	18	374		312	274	235	292	271	226	304	232	235	140		873.2	356	918.187
																29	319	259	248	330	280	253	294	276	250	21	146	12.6	824	21	302		290	230	219	301	251	224	265	247	221	125		811.4	281	724.749
																18	281	260	268	279	288	220	292	288	245	20	150	12	839	12	340		263	242	250	261	270	202	274	270	227	130		827	328	845.971
																16	291	243	242	295	280	233	313	259	251	24	144	14.4	824	25	335		275	227	226	279	264	217	297	243	235	120		809.6	310	799.545
																18	309	292	251	312	290	248	299	251	213	20	127	12	851	24	347		291	274	233	294	272	230	281	233	195	107		839	323	833.075
																23	304	269	274	263	293	253	292	262	247	20	129	12	842	13	363		281	246	251	240	270	230	269	239	224	109		830	350	902.712
																30	314	272	239	304	285	226	307	271	233	19	151	11.4	855	23	346		284	242	209	274	255	196	277	241	203	132		843.6	323	833.075
																25	321	269	282	326	263	259	266	269	229	24	132	14.4	817	26	328		296	244	257	301	238	234	241	244	204	108		802.6	302	778.912
																18	309	270	237	312	299	260	300	272	225	19	147	11.4	834	27	331		291	252	219	294	281	242	282	254	207	128		822.6	304	784.07
																24	324	292	233	306	282	240	280	259	238	33	143	19.8	891	15	331		300	268	209	282	258	216	256	235	214	110		871.2	316	815.02
																24	316	263	218	312	285	237	295	269	241	23	134	13.8	812	17	345		292	239	194	288	261	213	271	245	217	111		798.2	328	845.971
																22	292	291	240	317	295	255	328	274	221	27	138	16.2	808	19	332		270	269	218	295	273	233	306	252	199	111		791.8	313	807.283
																28	304	272	267	315	263	275	324	248	231	24	142	14.4	864	23	316		276	244	239	287	235	247	296	220	203	118		849.6	293	755.699
																31	340	311	270	287	283	239	336	262	233	24	150	14.4	816	25	320		309	280	239	256	252	208	305	231	202	126		801.6	295	760.858
																19	321	299	216	300	291	272	291	260	258	30	148	18	794	31	310		302	280	197	281	272	253	272	241	239	118		776	279	719.591
																22	331	255	244	307	292	231	293	258	228	21	125	12.6	840	21	317		309	233	222	285	270	209	271	236	206	104		827.4	296	763.437
																20	268	283	267	257	296	225	288	278	239	14	149	8.4	805	21	337		248	263	247	237	276	205	268	258	219	135		796.6	316	815.02
																11	291	282	228	334	266	234	289	290	223	18	141	10.8	822	11	320		280	271	217	323	255	223	278	279	212	123		811.2	309	796.966
																22	303	262	229	316	289	223	274	261	218	28	135	16.8	782	18	303		281	240	207	294	267	201	252	239	196	107		765.2	285	735.066
																20	305	266	259	336	241	251	266	280	242	24	128	14.4	841	17	294		285	246	239	316	221	231	246	260	222	104		826.6	277	714.432
																26	304	291	228	290	280	236	315	274	207	26	133	15.6	790	10	326		278	265	202	264	254	210	289	248	181	107		774.4	316	815.02
																23	279	257	228	287	282	223	284	271	215	16	137	9.6	768	28	310		256	234	205	264	259	200	261	248	192	121		758.4	282	727.328
																28	305	271	219	307	261	271	290	261	219	20	123	12	830	23	305		277	243	191	279	233	243	262	233	191	103		818	282	727.328
																19	342	237	270	300	285	257	247	244	243	25	160	15	796	17	320		323	218	251	281	266	238	228	225	224	135		781	303	781.491
																15	313	265	264	296	296	262	270	251	237	26	118	15.6	768	15	315		298	250	249	281	281	247	255	236	222	92		752.4	300	773.754
																22	331	269	218	292	244	236	311	261	228	18	152	10.8	809	25	305		309	247	196	270	222	214	289	239	206	134		798.2	280	722.17
																34	303	270	248	279	290	217	272	227	233	25	128	15	769	19	298		269	236	214	245	256	183	238	193	199	103		754	279	719.591
																21	316	287	247	296	266	277	278	253	234	17	148	10.2	764	25	325		295	266	226	275	245	256	257	232	213	131		753.8	300	773.754
																24	320	264	251	296	272	239	256	276	234	23	137	13.8	830	15	322		296	240	227	272	248	215	232	252	210	114		816.2	307	791.808
																20	283	286	228	301	290	236	285	258	247	23	163	13.8	815	18	301		263	266	208	281	270	216	265	238	227	140		801.2	283	729.907
																21	286	256	253	309	300	226	301	259	192	17	126	10.2	807	23	316		265	235	232	288	279	205	280	238	171	109		796.8	293	755.699
																23	287	267	237	269	250	232	274	258	190	18	134	10.8	832	21	314		264	244	214	246	227	209	251	235	167	116		821.2	293	755.699
																22	319	274	230	270	295	231	298	266	246	29	153	17.4	840	28	284		297	252	208	248	273	209	276	244	224	124		822.6	256	660.27
																21	329	288	237	318	289	225	266	236	257	22	135	13.2	786	26	286		308	267	216	297	268	204	245	215	236	113		772.8	260	670.586
																11	313	273	258	280	287	243	279	262	237	16	143	9.6	773	23	297		302	262	247	269	276	232	268	251	226	127		763.4	274	706.695
																21	293	260	254	291	265	240	274	226	286	27	154	16.2	767	26	314		272	239	233	270	244	219	253	205	265	127		750.8	288	742.803
																26	309	267	251	296	252	279	261	280	234	20	129	12	768	19	277		283	241	225	270	226	253	235	254	208	109		756	258	665.428
																19	297	288	244	303	282	212	288	260	229	22	124	13.2	811	17	306		278	269	225	284	263	193	269	241	210	102		797.8	289	745.383
																19	330	255	230	282	229	233	289	264	213	25	142	15	763	24	288		311	236	211	263	210	214	270	245	194	117		748	264	680.903
																11	316	279	249	279	230	224	278	242	212	22	151	13.2	705	22	301		305	268	238	268	219	213	267	231	201	129		691.8	279	719.591
																14	314	291	243	309	272	213	270	269	230	25	121	15	731	32	299		300	277	229	295	258	199	256	255	216	96		716	267	688.641
																20	302	274	254	308	288	227	274	260	247	27	139	16.2	773	20	294		282	254	234	288	268	207	254	240	227	112		756.8	274	706.695
																26	277	274	253	291	244	239	291	228	240	20	136	12	732	18	297		251	248	227	265	218	213	265	202	214	116		720	279	719.591
																22	301	268	231	302	252	242	318	239	240	16	130	9.6	736	21	294		279	246	209	280	230	220	296	217	218	114		726.4	273	704.116
																25	302	288	242	289	267	245	250	251	226	30	130	18	793	17	306		277	263	217	264	242	220	225	226	201	100		775	289	745.383
																21	312	260	239	296	274	223	311	235	256	17	146	10.2	768	25	253		291	239	218	275	253	202	290	214	235	129		757.8	228	588.053
																29	297	273	235	292	229	234	291	242	218	23	127	13.8	772	20	286		268	244	206	263	200	205	262	213	189	104		758.2	266	686.061
																25	297	243	204	276	280	227	310	291	230	18	124	10.8	721	16	300		272	218	179	251	255	202	285	266	205	106		710.2	284	732.487
																26	321	237	222	291	264	238	279	269	204	24	148	14.4	766	18	279		295	211	196	265	238	212	253	243	178	124		751.6	261	673.166
																25	310	272	222	289	261	235	284	237	226	26	153	15.6	765	14	287		285	247	197	264	236	210	259	212	201	127		749.4	273	704.116
																22	288	270	227	284	257	224	283	255	217	13	125	7.8	755	24	307		266	248	205	262	235	202	261	233	195	112		747.2	283	729.907
																25	291	289	232	310	263	238	257	268	240	22	128	13.2	755	25	275		266	264	207	285	238	213	232	243	215	106		741.8	250	644.795
																18	291	271	241	306	276	238	290	262	228	17	122	10.2	774	23	300		273	253	223	288	258	220	272	244	210	105		763.8	277	714.432
																19	287	306	192	305	251	231	284	249	229	20	153	12	717	15	279		268	287	173	286	232	212	265	230	210	133		705	264	680.903
																22	270	265	264	277	255	211	273	243	202	20	125	12	731	22	282		248	243	242	255	233	189	251	221	180	105		719	260	670.586
																25	300	285	230	303	277	237	266	269	220	21	133	12.6	731	21	269		275	260	205	278	252	212	241	244	195	112		718.4	248	639.636
																10	310	256	240	269	260	230	264	277	253	27	161	16.2	727	18	326		300	246	230	259	250	220	254	267	243	134		710.8	308	794.387
																14	264	241	243	285	246	253	262	238	227	16	131	9.6	735	16	268		250	227	229	271	232	239	248	224	213	115		725.4	252	649.953
																15	295	243	237	289	230	250	237	240	224	24	136	14.4	718	20	311		280	228	222	274	215	235	222	225	209	112		703.6	291	750.541
																28	327	250	220	285	276	242	266	251	216	24	145	14.4	723	23	277		299	222	192	257	248	214	238	223	188	121		708.6	254	655.111
																20	304	266	265	298	272	231	275	224	220	29	131	17.4	739	22	286		284	246	245	278	252	211	255	204	200	102		721.6	264	680.903
																27	271	264	201	282	288	237	276	268	246	14	146	8.4	704	25	271		244	237	174	255	261	210	249	241	219	132		695.6	246	634.478
																18	301	251	220	282	277	225	293	258	217	18	133	10.8	694	16	253		283	233	202	264	259	207	275	240	199	115		683.2	237	611.265
																30	287	255	265	283	247	249	269	246	220	16	129	9.6	714	24	274		257	225	235	253	217	219	239	216	190	113		704.4	250	644.795
																21	288	260	232	288	254	261	249	284	225	16	102	9.6	748	20	244		267	239	211	267	233	240	228	263	204	86		738.4	224	577.736
																18	309	275	225	299	274	236	263	237	208	18	125	10.8	680	25	287		291	257	207	281	256	218	245	219	190	107		669.2	262	675.745
																18	289	277	235	310	257	251	275	232	232	21	125	12.6	709	12	260		271	259	217	292	239	233	257	214	214	104		696.4	248	639.636
																26	294	261	223	275	272	197	287	232	228	19	128	11.4	677	17	268		268	235	197	249	246	171	261	206	202	109		665.6	251	647.374
																30	275	292	228	258	257	212	268	245	224	17	143	10.2	695	22	273		245	262	198	228	227	182	238	215	194	126		684.8	251	647.374
																16	303	243	242	291	281	242	311	267	232	14	126	8.4	686	19	285		287	227	226	275	265	226	295	251	216	112		677.6	266	686.061
																22	337	275	224	282	268	252	275	282	246	21	151	12.6	701	20	263		315	253	202	260	246	230	253	260	224	130		688.4	243	626.74
																18	292	287	229	277	316	203	276	253	212	22	141	13.2	685	22	290		274	269	211	259	298	185	258	235	194	119		671.8	268	691.22
																18	259	266	223	282	264	223	285	252	215	15	119	9	742	20	244		241	248	205	264	246	205	267	234	197	104		733	224	577.736
																21	298	256	241	301	256	238	303	241	227	24	137	14.4	691	25	263		277	235	220	280	235	217	282	220	206	113		676.6	238	613.844
																11	328	264	220	270	257	223	266	238	211	15	136	9	678	21	280		317	253	209	259	246	212	255	227	200	121		669	259	668.007
																19	297	229	208	310	265	237	266	255	242	24	137	14.4	697	14	262		278	210	189	291	246	218	247	236	223	113		682.6	248	639.636
																19	309	294	223	301	264	233	268	246	208	14	132	8.4	690	18	248		290	275	204	282	245	214	249	227	189	118		681.6	230	593.211
																19	276	244	237	287	272	216	288	216	225	24	119	14.4	655	16	264		257	225	218	268	253	197	269	197	206	95		640.6	248	639.636
																13	291	245	241	305	212	207	265	248	219	16	118	9.6	692	15	274		278	232	228	292	199	194	252	235	206	102		682.4	259	668.007
																17	287	275	203	270	272	217	252	247	240	22	108	13.2	658	18	295		270	258	186	253	255	200	235	230	223	86		644.8	277	714.432
																23	285	247	239	294	254	227	287	219	222	20	145	12	654	18	273		262	224	216	271	231	204	264	196	199	125		642	255	657.69
																17	286	268	230	286	277	216	287	237	230	30	122	18	702	20	252		269	251	213	269	260	199	270	220	213	92		684	232	598.369
																19	298	221	224	303	255	217	249	268	244	14	117	8.4	703	20	233		279	202	205	284	236	198	230	249	225	103		694.6	213	549.365
																14	315	250	222	292	264	234	265	251	215	24	131	14.4	683	25	240		301	236	208	278	250	220	251	237	201	107		668.6	215	554.523
																15	290	267	243	308	274	241	272	234	230	22	139	13.2	695	16	265		275	252	228	293	259	226	257	219	215	117		681.8	249	642.215
																20	293	256	235	291	273	240	288	216	214	22	129	13.2	627	20	252		273	236	215	271	253	220	268	196	194	107		613.8	232	598.369
																14	305	263	226	281	237	213	261	253	211	13	103	7.8	641	16	256		291	249	212	267	223	199	247	239	197	90		633.2	240	619.003
																16	271	247	212	273	251	222	269	238	207	15	113	9	625	14	246		255	231	196	257	235	206	253	222	191	98		616	232	598.369
																20	246	254	234	302	253	247	275	291	214	20	124	12	665	20	260		226	234	214	282	233	227	255	271	194	104		653	240	619.003
																20	271	246	239	270	255	209	274	213	204	20	123	12	658	19	258		251	226	219	250	235	189	254	193	184	103		646	239	616.424
																14	311	256	216	271	261	206	265	240	250	21	125	12.6	683	26	262		297	242	202	257	247	192	251	226	236	104		670.4	236	608.686
																19	299	278	244	266	242	210	259	215	233	25	124	15	636	20	233		280	259	225	247	223	191	240	196	214	99		621	213	549.365
																16	281	267	248	272	270	214	286	255	215	16	113	9.6	710	18	215		265	251	232	256	254	198	270	239	199	97		700.4	197	508.098
																18	277	265	244	269	265	240	265	267	212	17	123	10.2	673	18	256		259	247	226	251	247	222	247	249	194	106		662.8	238	613.844
																19	335	245	207	293	234	240	304	264	218	10	122	6	648	22	278		316	226	188	274	215	221	285	245	199	112		642	256	660.27
																19	308	244	210	297	269	214	279	215	225	21	139	12.6	637	28	254		289	225	191	278	250	195	260	196	206	118		624.4	226	582.894
																19	300	239	212	318	264	243	269	269	228	20	140	12	623	24	257		281	220	193	299	245	224	250	250	209	120		611	233	600.949
																15	320	250	237	275	259	243	276	233	225	18	120	10.8	615	19	245		305	235	222	260	244	228	261	218	210	102		604.2	226	582.894
																12	268	235	254	283	248	229	267	227	227	15	138	9	646	14	256		256	223	242	271	236	217	255	215	215	123		637	242	624.161
																16	287	232	260	289	257	216	288	228	203	24	103	14.4	641	17	244		271	216	244	273	241	200	272	212	187	79		626.6	227	585.473
																21	271	245	213	262	292	235	302	257	201	25	128	15	661	17	234		250	224	192	241	271	214	281	236	180	103		646	217	559.682
																16	272	280	224	266	278	224	272	261	212	17	128	10.2	660	19	289		256	264	208	250	262	208	256	245	196	111		649.8	270	696.378
																19	309	276	226	269	231	213	264	244	221	14	123	8.4	646	16	237		290	257	207	250	212	194	245	225	202	109		637.6	221	569.998
																13	301	249	241	275	224	201	282	248	210	13	135	7.8	640	17	211		288	236	228	262	211	188	269	235	197	122		632.2	194	500.361
																20	276	268	236	261	268	242	280	240	249	19	113	11.4	653	14	268		256	248	216	241	248	222	260	220	229	94		641.6	254	655.111
																17	291	236	249	291	263	237	294	259	226	18	123	10.8	601	12	270		274	219	232	274	246	220	277	242	209	105		590.2	258	665.428
																26	262	262	225	273	265	250	250	246	205	19	97	11.4	621	22	255		236	236	199	247	239	224	224	220	179	78		609.6	233	600.949
																13	300	272	236	278	250	231	275	242	236	14	123	8.4	632	21	258		287	259	223	265	237	218	262	229	223	109		623.6	237	611.265
																23	265	270	211	280	240	227	293	255	227	23	146	13.8	581	24	256		242	247	188	257	217	204	270	232	204	123		567.2	232	598.369
																25	300	282	237	277	243	226	287	245	202	22	113	13.2	652	24	264		275	257	212	252	218	201	262	220	177	91		638.8	240	619.003
																16	260	272	233	285	243	231	257	246	228	16	132	9.6	650	20	253		244	256	217	269	227	215	241	230	212	116		640.4	233	600.949
																22	267	248	237	238	252	231	266	264	219	21	125	12.6	641	13	252		245	226	215	216	230	209	244	242	197	104		628.4	239	616.424
																17	284	278	216	274	248	212	267	256	221	17	139	10.2	628	18	249		267	261	199	257	231	195	250	239	204	122		617.8	231	595.79
																26	285	270	243	273	264	256	273	256	195	10	111	6	583	13	225		259	244	217	247	238	230	247	230	169	101		577	212	546.786
																21	290	243	222	309	250	224	284	250	231	14	121	8.4	606	16	240		269	222	201	288	229	203	263	229	210	107		597.6	224	577.736
																25	283	276	244	294	270	220	256	242	247	16	113	9.6	641	21	222		258	251	219	269	245	195	231	217	222	97		631.4	201	518.415
																11	294	245	215	266	241	233	282	243	211	26	108	15.6	647	15	266		283	234	204	255	230	222	271	232	200	82		631.4	251	647.374
																20	259	263	251	257	266	235	281	269	232	17	109	10.2	610	24	233		239	243	231	237	246	215	261	249	212	92		599.8	209	539.048
																20	281	273	236	268	248	250	271	234	238	22	130	13.2	642	26	220		261	253	216	248	228	230	251	214	218	108		628.8	194	500.361
																19	297	270	244	254	272	224	262	217	203	16	116	9.6	638	17	256		278	251	225	235	253	205	243	198	184	100		628.4	239	616.424
																16	292	260	213	266	251	203	260	248	237	23	130	13.8	672	25	251		276	244	197	250	235	187	244	232	221	107		658.2	226	582.894
																21	291	255	235	296	251	221	265	214	221	19	121	11.4	636	17	243		270	234	214	275	230	200	244	193	200	102		624.6	226	582.894
																21	288	234	251	237	248	224	278	256	219	12	129	7.2	614	26	231		267	213	230	216	227	203	257	235	198	117		606.8	205	528.732
																20	270	267	235	293	236	228	239	232	207	21	120	12.6	602	16	220		250	247	215	273	216	208	219	212	187	99		589.4	204	526.152
																18	280	251	224	287	234	236	260	245	226	24	127	14.4	615	21	255		262	233	206	269	216	218	242	227	208	103		600.6	234	603.528
																31	277	263	228	294	254	244	277	293	234	20	135	12	652	27	251		246	232	197	263	223	213	246	262	203	115		640	224	577.736
																51	308	286	243	293	279	238	289	274	222	46	156	27.6	649	44	274		257	235	192	242	228	187	238	223	171	110		621.4	230	593.211
																59	319	268	289	352	333	274	326	295	276	67	178	40.2	655	62	298		260	209	230	293	274	215	267	236	217	111		614.8	236	608.686
																73	330	309	271	315	312	275	314	280	259	72	199	43.2	651	76	301		257	236	198	242	239	202	241	207	186	127		607.8	225	580.315
																75	315	314	276	356	291	282	306	300	257	80	195	48	603	81	284		240	239	201	281	216	207	231	225	182	115		555	203	523.573
																54	295	291	254	307	246	254	325	298	229	50	128	30	623	38	269		241	237	200	253	192	200	271	244	175	78		593	231	595.79
																29	262	248	247	282	264	249	281	229	245	28	139	16.8	591	27	235		233	219	218	253	235	220	252	200	216	111		574.2	208	536.469
																20	275	250	201	268	259	204	271	249	231	23	118	13.8	608	21	249		255	230	181	248	239	184	251	229	211	95		594.2	228	588.053
																20	279	247	223	272	232	195	302	228	216	17	131	10.2	576	19	232		259	227	203	252	212	175	282	208	196	114		565.8	213	549.365
																22	270	242	222	251	251	225	251	238	220	14	96	8.4	593	19	251		248	220	200	229	229	203	229	216	198	82		584.6	232	598.369
																17	279	252	225	266	242	233	292	248	228	23	121	13.8	609	26	261		262	235	208	249	225	216	275	231	211	98		595.2	235	606.107
																18	266	255	200	249	238	237	267	205	212	21	126	12.6	625	15	205		248	237	182	231	220	219	249	187	194	105		612.4	190	490.044
																24	317	266	228	287	247	190	271	226	221	17	125	10.2	609	17	245		293	242	204	263	223	166	247	202	197	108		598.8	228	588.053
																19	265	246	224	296	264	246	266	215	233	20	112	12	610	20	223		246	227	205	277	245	227	247	196	214	92		598	203	523.573
																21	247	253	226	314	250	233	301	225	196	21	123	12.6	602	20	263		226	232	205	293	229	212	280	204	175	102		589.4	243	626.74
																23	276	226	231	271	258	242	261	253	230	21	133	12.6	645	26	231		253	203	208	248	235	219	238	230	207	112		632.4	205	528.732
																26	288	246	215	265	252	232	282	248	239	27	104	16.2	632	19	255		262	220	189	239	226	206	256	222	213	77		615.8	236	608.686
																26	285	264	240	286	257	229	283	261	224	23	119	13.8	619	29	218		259	238	214	260	231	203	257	235	198	96		605.2	189	487.465
																21	297	270	219	263	253	233	292	258	215	18	148	10.8	582	27	210		276	249	198	242	232	212	271	237	194	130		571.2	183	471.99
																31	265	249	256	274	279	213	300	263	215	26	124	15.6	591	28	242		234	218	225	243	248	182	269	232	184	98		575.4	214	551.944
																31	293	231	206	288	272	253	314	230	233	18	128	10.8	596	13	204		262	200	175	257	241	222	283	199	202	110		585.2	191	492.623
																21	288	244	219	253	224	225	293	222	224	21	127	12.6	584	14	244		267	223	198	232	203	204	272	201	203	106		571.4	230	593.211
																13	311	240	210	268	254	213	288	240	215	14	117	8.4	606	23	221		298	227	197	255	241	200	275	227	202	103		597.6	198	510.677
																19	314	242	231	258	243	229	267	215	223	11	119	6.6	594	22	234		295	223	212	239	224	210	248	196	204	108		587.4	212	546.786
																16	282	229	229	267	233	241	275	239	187	15	113	9	595	22	257		266	213	213	251	217	225	259	223	171	98		586	235	606.107
																13	262	234	205	279	243	213	237	252	236	27	91	16.2	580	11	226		249	221	192	266	230	200	224	239	223	64		563.8	215	554.523
																9	266	258	222	278	272	222	251	271	184	16	123	9.6	580	15	224		257	249	213	269	263	213	242	262	175	107		570.4	209	539.048
																24	276	232	216	246	239	197	234	237	195	12	131	7.2	585	20	250		252	208	192	222	215	173	210	213	171	119		577.8	230	593.211
																15	274	215	232	255	279	214	236	224	222	15	116	9	621	13	201		259	200	217	240	264	199	221	209	207	101		612	188	484.886
																19	296	241	215	248	220	221	271	245	193	19	116	11.4	585	21	219		277	222	196	229	201	202	252	226	174	97		573.6	198	510.677
																20	256	258	205	304	276	213	240	235	247	18	119	10.8	600	14	224		236	238	185	284	256	193	220	215	227	101		589.2	210	541.627
																18	285	249	187	287	238	206	266	216	187	12	117	7.2	598	20	236		267	231	169	269	220	188	248	198	169	105		590.8	216	557.103
																17	272	256	202	261	251	226	305	219	201	16	121	9.6	592	19	222		255	239	185	244	234	209	288	202	184	105		582.4	203	523.573
																14	289	254	237	293	248	187	269	221	199	20	130	12	580	15	238		275	240	223	279	234	173	255	207	185	110		568	223	575.157
																21	283	230	226	295	248	200	293	238	210	22	113	13.2	569	20	231		262	209	205	274	227	179	272	217	189	91		555.8	211	544.207
																17	278	268	223	277	251	228	285	212	227	22	111	13.2	590	10	208		261	251	206	260	234	211	268	195	210	89		576.8	198	510.677
																12	277	236	203	282	230	211	263	271	212	8	122	4.8	589	10	229		265	224	191	270	218	199	251	259	200	114		584.2	219	564.84
																12	283	262	208	256	236	217	256	243	219	17	124	10.2	574	14	218		271	250	196	244	224	205	244	231	207	107		563.8	204	526.152
																17	243	259	227	249	232	217	259	247	215	19	129	11.4	574	24	246		226	242	210	232	215	200	242	230	198	110		562.6	222	572.578
																19	270	259	215	306	240	231	244	248	240	14	112	8.4	610	7	226		251	240	196	287	221	212	225	229	221	98		601.6	219	564.84
																14	307	245	217	273	234	204	253	217	243	19	142	11.4	601	14	218		293	231	203	259	220	190	239	203	229	123		589.6	204	526.152
																11	270	243	231	276	273	230	245	221	231	14	108	8.4	567	18	236		259	232	220	265	262	219	234	210	220	94		558.6	218	562.261
																18	270	230	221	239	242	227	270	207	191	12	141	7.2	569	11	223		252	212	203	221	224	209	252	189	173	129		561.8	212	546.786
																16	256	280	220	286	268	214	265	211	187	14	127	8.4	545	12	177		240	264	204	270	252	198	249	195	171	113		536.6	165	425.564
																15	261	247	224	273	221	217	277	259	214	11	107	6.6	539	13	237		246	232	209	258	206	202	262	244	199	96		532.4	224	577.736
																12	277	248	223	257	234	219	242	229	227	18	134	10.8	596	22	238		265	236	211	245	222	207	230	217	215	116		585.2	216	557.103
																8	286	238	234	249	261	209	246	225	180	11	107	6.6	595	17	213		278	230	226	241	253	201	238	217	172	96		588.4	196	505.519
																22	305	235	210	262	264	215	282	229	200	13	101	7.8	560	11	211		283	213	188	240	242	193	260	207	178	88		552.2	200	515.836
																21	305	240	189	306	239	225	238	233	206	20	110	12	537	16	194		284	219	168	285	218	204	217	212	185	90		525	178	459.094
																13	278	220	219	273	241	207	284	228	213	11	96	6.6	539	21	229		265	207	206	260	228	194	271	215	200	85		532.4	208	536.469
																16	284	222	229	294	265	221	274	233	198	10	111	6	587	20	206		268	206	213	278	249	205	258	217	182	101		581	186	479.727
																14	275	252	216	269	232	219	251	232	211	13	124	7.8	561	18	247		261	238	202	255	218	205	237	218	197	111		553.2	229	590.632
																12	278	264	223	271	255	208	266	226	197	8	112	4.8	555	17	232		266	252	211	259	243	196	254	214	185	104		550.2	215	554.523
																16	313	262	243	279	266	225	280	238	209	21	118	12.6	546	14	236		297	246	227	263	250	209	264	222	193	97		533.4	222	572.578
																11	273	229	216	290	245	232	277	246	210	21	114	12.6	572	15	229		262	218	205	279	234	221	266	235	199	93		559.4	214	551.944
																16	309	243	234	253	234	258	283	236	220	17	130	10.2	572	16	208		293	227	218	237	218	242	267	220	204	113		561.8	192	495.202
																19	274	241	216	247	272	224	270	238	186	12	98	7.2	558	13	229		255	222	197	228	253	205	251	219	167	86		550.8	216	557.103
																18	289	244	217	287	263	200	281	238	185	16	123	9.6	540	11	226		271	226	199	269	245	182	263	220	167	107		530.4	215	554.523
																19	264	246	235	266	239	206	271	235	230	10	101	6	572	13	238		245	227	216	247	220	187	252	216	211	91		566	225	580.315
																15	309	244	216	279	233	221	246	266	205	17	119	10.2	527	16	213		294	229	201	264	218	206	231	251	190	102		516.8	197	508.098
																17	248	257	224	270	266	219	266	250	201	13	105	7.8	603	14	219		231	240	207	253	249	202	249	233	184	92		595.2	205	528.732
																15	298	251	246	260	234	217	257	205	194	20	107	12	557	13	227		283	236	231	245	219	202	242	190	179	87		545	214	551.944
																12	279	252	264	280	251	227	260	222	201	11	113	6.6	556	15	238		267	240	252	268	239	215	248	210	189	102		549.4	223	575.157
																20	261	261	190	255	246	235	259	222	210	16	120	9.6	566	20	194		241	241	170	235	226	215	239	202	190	104		556.4	174	448.777
																13	281	256	230	271	243	221	264	227	211	15	101	9	549	15	226		268	243	217	258	230	208	251	214	198	86		540	211	544.207
																10	294	249	212	233	248	228	262	215	188	23	104	13.8	548	11	206		284	239	202	223	238	218	252	205	178	81		534.2	195	502.94
																14	269	232	216	293	256	218	262	246	212	14	115	8.4	575	12	219		255	218	202	279	242	204	248	232	198	101		566.6	207	533.89
																12	270	250	243	295	241	197	237	231	188	15	116	9	559	14	243		258	238	231	283	229	185	225	219	176	101		550	229	590.632
																14	257	240	241	271	235	215	265	254	182	18	117	10.8	573	10	214		243	226	227	257	221	201	251	240	168	99		562.2	204	526.152
																17	279	245	183	250	250	249	241	234	204	14	95	8.4	509	19	196		262	228	166	233	233	232	224	217	187	81		500.6	177	456.515
																18	274	248	220	282	261	235	241	230	180	9	103	5.4	547	14	203		256	230	202	264	243	217	223	212	162	94		541.6	189	487.465
																12	291	231	216	260	242	215	265	234	201	15	131	9	578	13	232		279	219	204	248	230	203	253	222	189	116		569	219	564.84
																18	289	240	249	268	245	221	248	224	210	16	88	9.6	592	11	201		271	222	231	250	227	203	230	206	192	72		582.4	190	490.044
																10	278	276	238	257	243	206	248	240	198	14	110	8.4	583	15	213		268	266	228	247	233	196	238	230	188	96		574.6	198	510.677
																9	280	246	215	266	257	197	284	240	195	16	93	9.6	578	19	193		271	237	206	257	248	188	275	231	186	77		568.4	174	448.777
																13	276	261	237	279	246	224	253	198	199	17	97	10.2	592	17	239		263	248	224	266	233	211	240	185	186	80		581.8	222	572.578
																12	282	245	218	288	253	213	273	226	222	19	107	11.4	559	16	211		270	233	206	276	241	201	261	214	210	88		547.6	195	502.94
																13	269	232	229	247	281	219	246	224	214	14	115	8.4	544	9	221		256	219	216	234	268	206	233	211	201	101		535.6	212	546.786
																17	267	244	223	231	249	226	252	245	220	15	115	9	560	16	232		250	227	206	214	232	209	235	228	203	100		551	216	557.103
																11	273	259	215	248	254	231	248	210	191	10	115	6	570	15	244		262	248	204	237	243	220	237	199	180	105		564	229	590.632
																14	297	256	188	274	265	237	263	249	211	16	112	9.6	576	23	213		283	242	174	260	251	223	249	235	197	96		566.4	190	490.044
																12	272	225	248	268	232	220	265	248	195	12	111	7.2	558	14	212		260	213	236	256	220	208	253	236	183	99		550.8	198	510.677
																20	282	229	219	288	241	205	267	213	189	13	102	7.8	536	11	225		262	209	199	268	221	185	247	193	169	89		528.2	214	551.944
																17	292	233	253	283	239	223	246	202	201	16	117	9.6	589	12	246		275	216	236	266	222	206	229	185	184	101		579.4	234	603.528
																12	276	232	221	275	268	203	274	226	199	15	104	9	567	16	211		264	220	209	263	256	191	262	214	187	89		558	195	502.94
																10	281	260	245	265	270	236	267	235	228	11	99	6.6	568	14	202		271	250	235	255	260	226	257	225	218	88		561.4	188	484.886
																14	280	249	205	256	250	205	256	231	190	15	121	9	521	16	205		266	235	191	242	236	191	242	217	176	106		512	189	487.465
																15	259	243	205	266	214	210	291	233	201	21	90	12.6	519	12	232		244	228	190	251	199	195	276	218	186	69		506.4	220	567.419
																13	266	272	194	247	232	218	270	226	237	19	119	11.4	516	12	220		253	259	181	234	219	205	257	213	224	100		504.6	208	536.469
																8	247	274	214	257	244	198	273	221	223	15	110	9	594	10	221		239	266	206	249	236	190	265	213	215	95		585	211	544.207
																17	291	265	221	283	258	217	253	226	205	12	111	7.2	571	13	207		274	248	204	266	241	200	236	209	188	99		563.8	194	500.361
																13	270	269	215	280	250	220	254	220	220	13	112	7.8	503	10	215		257	256	202	267	237	207	241	207	207	99		495.2	205	528.732
																18	261	239	195	255	274	229	250	253	205	9	98	5.4	571	10	223		243	221	177	237	256	211	232	235	187	89		565.6	213	549.365
																7	274	258	184	284	261	196	249	228	209	14	118	8.4	558	19	220		267	251	177	277	254	189	242	221	202	104		549.6	201	518.415
																15	268	263	231	284	275	234	252	283	217	10	135	6	543	21	209		253	248	216	269	260	219	237	268	202	125		537	188	484.886
																11	294	240	205	268	245	226	236	243	191	14	101	8.4	564	9	223		283	229	194	257	234	215	225	232	180	87		555.6	214	551.944
																20	274	238	231	247	250	220	278	216	229	16	115	9.6	530	15	206		254	218	211	227	230	200	258	196	209	99		520.4	191	492.623
																12	270	239	214	279	253	237	268	251	220	14	116	8.4	539	18	219		258	227	202	267	241	225	256	239	208	102		530.6	201	518.415
																10	259	253	256	259	233	231	274	228	211	19	120	11.4	541	9	200		249	243	246	249	223	221	264	218	201	101		529.6	191	492.623
																8	269	246	214	295	231	190	266	228	222	11	129	6.6	531	24	230		261	238	206	287	223	182	258	220	214	118		524.4	206	531.311
																14	298	261	214	252	215	233	247	226	201	18	122	10.8	546	16	200		284	247	200	238	201	219	233	212	187	104		535.2	184	474.569
																22	265	254	246	264	260	223	246	210	230	13	122	7.8	566	9	224		243	232	224	242	238	201	224	188	208	109		558.2	215	554.523
																4	267	276	211	265	250	209	269	226	204	13	95	7.8	524	18	241		263	272	207	261	246	205	265	222	200	82		516.2	223	575.157
																15	264	252	227	284	248	228	249	262	186	12	121	7.2	540	9	188		249	237	212	269	233	213	234	247	171	109		532.8	179	461.673
																15	265	248	203	258	240	228	289	241	208	16	92	9.6	551	7	207		250	233	188	243	225	213	274	226	193	76		541.4	200	515.836
																13	270	227	229	264	289	206	259	226	207	18	123	10.8	533	17	218		257	214	216	251	276	193	246	213	194	105		522.2	201	518.415
																15	306	240	222	257	223	235	292	233	229	14	129	8.4	549	19	205		291	225	207	242	208	220	277	218	214	115		540.6	186	479.727
																8	262	242	203	276	238	225	279	242	217	7	109	4.2	552	18	211		254	234	195	268	230	217	271	234	209	102		547.8	193	497.781
																10	267	254	212	278	213	232	234	230	224	14	109	8.4	527	15	208		257	244	202	268	203	222	224	220	214	95		518.6	193	497.781
																13	234	218	223	262	239	201	281	239	224	16	106	9.6	572	13	187		221	205	210	249	226	188	268	226	211	90		562.4	174	448.777
																16	273	230	222	248	261	244	271	232	194	4	119	2.4	564	8	190		257	214	206	232	245	228	255	216	178	115		561.6	182	469.41
																17	256	262	214	290	228	214	246	237	230	17	115	10.2	532	16	219		239	245	197	273	211	197	229	220	213	98		521.8	203	523.573
																10	274	246	241	265	222	207	279	212	215	17	108	10.2	529	12	228		264	236	231	255	212	197	269	202	205	91		518.8	216	557.103
																10	270	269	248	272	277	220	255	207	206	8	107	4.8	539	5	225		260	259	238	262	267	210	245	197	196	99		534.2	220	567.419
																12	262	246	222	288	240	203	264	243	198	9	123	5.4	551	13	234		250	234	210	276	228	191	252	231	186	114		545.6	221	569.998
																19	278	258	218	259	238	218	254	222	236	8	112	4.8	528	15	184		259	239	199	240	219	199	235	203	217	104		523.2	169	435.881
																11	271	266	211	278	259	222	258	229	218	15	103	9	532	19	204		260	255	200	267	248	211	247	218	207	88		523	185	477.148
																20	253	248	231	257	259	246	255	239	194	12	95	7.2	514	10	209		233	228	211	237	239	226	235	219	174	83		506.8	199	513.256
																9	277	227	225	275	225	195	263	252	228	7	113	4.2	514	18	207		268	218	216	266	216	186	254	243	219	106		509.8	189	487.465
																14	278	278	209	258	267	226	278	222	196	10	96	6	570	8	199		264	264	195	244	253	212	264	208	182	86		564	191	492.623
																6	251	230	208	298	249	195	268	250	209	10	90	6	513	14	181		245	224	202	292	243	189	262	244	203	80		507	167	430.723
																18	267	244	239	244	273	204	258	228	220	12	102	7.2	523	10	202		249	226	221	226	255	186	240	210	202	90		515.8	192	495.202
																15	277	255	206	287	261	203	272	220	183	9	97	5.4	552	12	227		262	240	191	272	246	188	257	205	168	88		546.6	215	554.523
																8	285	246	234	255	243	213	285	219	223	16	101	9.6	528	14	234		277	238	226	247	235	205	277	211	215	85		518.4	220	567.419
																7	303	240	211	262	241	217	226	235	200	13	106	7.8	521	15	218		296	233	204	255	234	210	219	228	193	93		513.2	203	523.573
																12	281	254	225	270	253	213	239	224	218	13	94	7.8	577	15	230		269	242	213	258	241	201	227	212	206	81		569.2	215	554.523
																16	284	268	225	278	243	231	265	228	198	16	116	9.6	551	10	227		268	252	209	262	227	215	249	212	182	100		541.4	217	559.682
																23	286	263	241	271	257	212	273	240	245	6	104	3.6	519	15	200		263	240	218	248	234	189	250	217	222	98		515.4	185	477.148
																15	250	245	210	264	252	232	250	240	197	10	97	6	504	10	200		235	230	195	249	237	217	235	225	182	87		498	190	490.044
																19	271	261	225	288	251	200	284	243	203	9	110	5.4	571	10	198		252	242	206	269	232	181	265	224	184	101		565.6	188	484.886
																14	273	260	238	277	258	237	249	232	230	6	114	3.6	562	17	210		259	246	224	263	244	223	235	218	216	108		558.4	193	497.781
																15	290	254	206	251	228	236	261	239	208	16	103	9.6	543	11	219		275	239	191	236	213	221	246	224	193	87		533.4	208	536.469
																15	273	238	226	267	230	222	256	239	199	13	105	7.8	545	18	185		258	223	211	252	215	207	241	224	184	92		537.2	167	430.723
																15	264	246	212	287	250	206	270	229	208	10	101	6	501	13	206		249	231	197	272	235	191	255	214	193	91		495	193	497.781
																12	291	245	226	279	258	247	243	253	229	11	112	6.6	533	12	224		279	233	214	267	246	235	231	241	217	101		526.4	212	546.786
																12	306	217	230	279	253	223	277	263	222	15	101	9	537	11	198		294	205	218	267	241	211	265	251	210	86		528	187	482.306
																12	277	267	184	304	265	230	265	254	213	12	118	7.2	573	12	222		265	255	172	292	253	218	253	242	201	106		565.8	210	541.627
																12	271	225	223	277	251	239	257	251	209	14	105	8.4	518	13	215		259	213	211	265	239	227	245	239	197	91		509.6	202	520.994
																10	266	282	202	258	239	214	281	246	241	7	105	4.2	538	14	186		256	272	192	248	229	204	271	236	231	98		533.8	172	443.619
																8	276	253	216	271	253	211	263	222	202	9	87	5.4	516	9	226		268	245	208	263	245	203	255	214	194	78		510.6	217	559.682
																21	246	234	223	265	249	210	268	234	221	14	111	8.4	502	11	198		225	213	202	244	228	189	247	213	200	97		493.6	187	482.306
																17	270	253	218	291	231	231	248	240	200	12	105	7.2	535	13	240		253	236	201	274	214	214	231	223	183	93		527.8	227	585.473
																14	310	235	231	268	244	221	241	232	220	15	137	9	548	8	196		296	221	217	254	230	207	227	218	206	122		539	188	484.886
																17	306	252	222	298	247	209	250	230	235	12	106	7.2	503	14	234		289	235	205	281	230	192	233	213	218	94		495.8	220	567.419
																22	291	251	235	259	262	206	283	264	220	11	106	6.6	571	17	206		269	229	213	237	240	184	261	242	198	95		564.4	189	487.465
																19	315	268	244	269	232	220	293	243	237	21	110	12.6	508	10	218		296	249	225	250	213	201	274	224	218	89		495.4	208	536.469
																17	283	261	226	283	268	229	281	241	216	15	106	9	583	19	215		266	244	209	266	251	212	264	224	199	91		574	196	505.519
																15	277	256	237	264	290	228	249	266	185	16	109	9.6	512	11	216		262	241	222	249	275	213	234	251	170	93		502.4	205	528.732
																14	300	236	250	261	241	236	281	271	228	10	105	6	559	8	217		286	222	236	247	227	222	267	257	214	95		553	209	539.048
																15	263	248	230	303	275	200	250	248	224	16	111	9.6	531	15	195		248	233	215	288	260	185	235	233	209	95		521.4	180	464.252
																9	278	256	243	254	248	243	305	241	231	10	112	6	555	12	198		269	247	234	245	239	234	296	232	222	102		549	186	479.727
																13	277	254	201	270	233	215	255	251	222	12	110	7.2	514	13	206		264	241	188	257	220	202	242	238	209	98		506.8	193	497.781
																10	283	246	234	259	233	215	279	242	203	7	116	4.2	537	11	224		273	236	224	249	223	205	269	232	193	109		532.8	213	549.365
																15	283	241	260	286	238	203	283	244	203	14	91	8.4	570	8	189		268	226	245	271	223	188	268	229	188	77		561.6	181	466.831
																13	282	243	231	275	246	227	267	247	199	4	118	2.4	544	13	212		269	230	218	262	233	214	254	234	186	114		541.6	199	513.256
																15	286	219	248	266	253	231	285	229	205	12	109	7.2	550	15	221		271	204	233	251	238	216	270	214	190	97		542.8	206	531.311
																16	284	244	227	259	276	198	278	251	225	10	102	6	534	11	201		268	228	211	243	260	182	262	235	209	92		528	190	490.044
																10	302	250	227	283	260	210	254	247	216	10	99	6	548	16	207		292	240	217	273	250	200	244	237	206	89		542	191	492.623
																10	302	237	241	255	239	222	251	242	231	18	129	10.8	520	18	209		292	227	231	245	229	212	241	232	221	111		509.2	191	492.623
																8	286	249	236	273	275	218	262	236	205	14	122	8.4	528	15	220		278	241	228	265	267	210	254	228	197	108		519.6	205	528.732
																13	279	241	237	280	254	223	252	228	201	5	106	3	536	13	225		266	228	224	267	241	210	239	215	188	101		533	212	546.786
																12	286	241	211	296	266	200	269	242	214	11	106	6.6	556	10	215		274	229	199	284	254	188	257	230	202	95		549.4	205	528.732
																5	270	257	226	291	240	252	262	214	213	11	116	6.6	509	19	219		265	252	221	286	235	247	257	209	208	105		502.4	200	515.836
																11	282	233	219	255	235	221	290	242	203	33	107	19.8	521	5	178		271	222	208	244	224	210	279	231	192	74		501.2	173	446.198
																13	299	266	197	262	254	219	267	202	202	10	104	6	571	12	223		286	253	184	249	241	206	254	189	189	94		565	211	544.207
																6	286	242	238	303	278	213	290	249	208	17	101	10.2	541	13	246		280	236	232	297	272	207	284	243	202	84		530.8	233	600.949
																9	256	254	238	267	262	224	241	252	221	14	101	8.4	520	9	216		247	245	229	258	253	215	232	243	212	87		511.6	207	533.89
																14	304	259	197	273	269	218	279	234	227	14	108	8.4	546	13	211		290	245	183	259	255	204	265	220	213	94		537.6	198	510.677
																10	291	244	218	267	239	241	265	281	202	9	87	5.4	509	13	212		281	234	208	257	229	231	255	271	192	78		503.6	199	513.256
																11	281	241	212	283	236	226	279	230	180	9	111	5.4	572	15	215		270	230	201	272	225	215	268	219	169	102		566.6	200	515.836
																17	256	227	244	235	232	226	268	222	194	9	111	5.4	516	9	209		239	210	227	218	215	209	251	205	177	102		510.6	200	515.836
																16	281	246	220	297	240	246	278	247	215	8	121	4.8	517	14	191		265	230	204	281	224	230	262	231	199	113		512.2	177	456.515
																7	291	263	203	260	265	185	283	253	204	10	112	6	562	11	194		284	256	196	253	258	178	276	246	197	102		556	183	471.99
																16	264	244	225	281	295	221	240	238	237	17	82	10.2	502	5	204		248	228	209	265	279	205	224	222	221	65		491.8	199	513.256
																17	289	252	222	264	268	228	260	277	226	10	108	6	538	12	214		272	235	205	247	251	211	243	260	209	98		532	202	520.994
																11	262	255	252	284	259	246	265	241	191	11	100	6.6	522	10	175		251	244	241	273	248	235	254	230	180	89		515.4	165	425.564
																18	300	238	216	286	225	228	275	248	211	15	122	9	502	12	210		282	220	198	268	207	210	257	230	193	107		493	198	510.677
																14	301	252	209	274	273	234	242	232	205	19	121	11.4	509	14	221		287	238	195	260	259	220	228	218	191	102		497.6	207	533.89
																23	285	265	226	277	266	219	271	261	217	10	114	6	502	16	191		262	242	203	254	243	196	248	238	194	104		496	175	451.356
																6	263	245	201	274	304	204	281	245	239	15	93	9	585	15	219		257	239	195	268	298	198	275	239	233	78		576	204	526.152
																12	296	232	217	269	240	218	304	251	187	13	118	7.8	555	11	191		284	220	205	257	228	206	292	239	175	105		547.2	180	464.252
																10	277	247	215	274	221	205	259	243	213	12	113	7.2	538	9	209		267	237	205	264	211	195	249	233	203	101		530.8	200	515.836
																15	315	272	204	280	268	208	278	229	214	11	103	6.6	536	14	164		300	257	189	265	253	193	263	214	199	92		529.4	150	386.877
																7	287	267	261	263	271	227	268	247	217	10	104	6	545	14	203		280	260	254	256	264	220	261	240	210	94		539	189	487.465
																16	285	248	211	317	251	241	267	225	207	19	98	11.4	523	11	219		269	232	195	301	235	225	251	209	191	79		511.6	208	536.469
																10	249	237	228	277	242	224	249	257	228	17	110	10.2	524	14	196		239	227	218	267	232	214	239	247	218	93		513.8	182	469.41
																13	278	249	208	275	263	214	252	250	204	13	107	7.8	523	9	222		265	236	195	262	250	201	239	237	191	94		515.2	213	549.365
																13	281	251	183	278	269	210	234	249	227	13	119	7.8	530	7	179		268	238	170	265	256	197	221	236	214	106		522.2	172	443.619
																11	298	253	232	284	258	225	252	279	250	11	104	6.6	569	9	211		287	242	221	273	247	214	241	268	239	93		562.4	202	520.994
																17	250	270	237	275	235	213	270	218	218	18	114	10.8	583	12	176		233	253	220	258	218	196	253	201	201	96		572.2	164	422.985
																8	271	265	235	291	266	204	279	240	203	11	115	6.6	553	17	163		263	257	227	283	258	196	271	232	195	104		546.4	146	376.56
																6	285	253	237	301	252	198	272	249	219	8	105	4.8	478	12	212		279	247	231	295	246	192	266	243	213	97		473.2	200	515.836
																16	343	247	240	263	253	220	259	221	232	13	81	7.8	539	15	209		327	231	224	247	237	204	243	205	216	68		531.2	194	500.361
																10	299	258	210	272	214	225	264	246	212	8	113	4.8	520	10	216		289	248	200	262	204	215	254	236	202	105		515.2	206	531.311
																7	296	235	219	301	252	229	266	255	229	17	117	10.2	525	22	197		289	228	212	294	245	222	259	248	222	100		514.8	175	451.356
																16	309	245	221	252	278	253	294	255	212	14	94	8.4	539	14	203		293	229	205	236	262	237	278	239	196	80		530.6	189	487.465
																13	281	268	206	264	250	236	246	230	212	11	106	6.6	561	10	194		268	255	193	251	237	223	233	217	199	95		554.4	184	474.569
																14	278	231	212	306	270	241	254	243	232	8	97	4.8	587	20	200		264	217	198	292	256	227	240	229	218	89		582.2	180	464.252
																13	274	259	258	266	251	202	285	224	209	12	112	7.2	563	21	186		261	246	245	253	238	189	272	211	196	100		555.8	165	425.564
																18	287	278	226	283	263	222	272	226	236	11	83	6.6	516	7	222		269	260	208	265	245	204	254	208	218	72		509.4	215	554.523
																7	279	245	219	325	236	235	255	226	211	12	102	7.2	512	8	204		272	238	212	318	229	228	248	219	204	90		504.8	196	505.519
																11	284	254	232	278	244	199	261	230	203	14	98	8.4	541	13	198		273	243	221	267	233	188	250	219	192	84		532.6	185	477.148
																14	277	249	226	256	248	233	256	258	205	11	125	6.6	512	12	226		263	235	212	242	234	219	242	244	191	114		505.4	214	551.944
																14	286	258	228	290	239	215	268	234	220	10	106	6	571	11	224		272	244	214	276	225	201	254	220	206	96		565	213	549.365
																8	302	237	245	264	268	221	280	221	234	9	102	5.4	572	7	212		294	229	237	256	260	213	272	213	226	93		566.6	205	528.732
																8	280	255	252	278	259	250	267	262	211	10	97	6	555	15	236		272	247	244	270	251	242	259	254	203	87		549	221	569.998
																13	315	265	239	265	287	213	256	234	209	8	87	4.8	492	10	205		302	252	226	252	274	200	243	221	196	79		487.2	195	502.94
																8	286	240	229	286	279	225	275	272	215	13	93	7.8	520	9	199		278	232	221	278	271	217	267	264	207	80		512.2	190	490.044
																15	280	238	217	277	271	245	249	259	222	11	104	6.6	536	18	196		265	223	202	262	256	230	234	244	207	93		529.4	178	459.094
																13	290	273	214	277	239	214	260	220	210	9	111	5.4	493	16	202		277	260	201	264	226	201	247	207	197	102		487.6	186	479.727
																12	284	243	218	267	258	237	287	239	217	6	101	3.6	551	14	187		272	231	206	255	246	225	275	227	205	95		547.4	173	446.198
																8	287	252	226	281	235	230	284	268	219	21	103	12.6	507	13	203		279	244	218	273	227	222	276	260	211	82		494.4	190	490.044
																10	290	240	216	306	237	238	275	252	216	14	93	8.4	539	10	223		280	230	206	296	227	228	265	242	206	79		530.6	213	549.365
																12	296	248	245	289	239	232	259	210	202	11	111	6.6	514	13	201		284	236	233	277	227	220	247	198	190	100		507.4	188	484.886
																6	284	278	232	288	276	224	262	221	220	11	96	6.6	527	11	195		278	272	226	282	270	218	256	215	214	85		520.4	184	474.569
																6	291	291	223	307	239	232	263	232	211	8	113	4.8	541	12	211		285	285	217	301	233	226	257	226	205	105		536.2	199	513.256
																11	278	237	217	273	267	221	267	251	226	15	111	9	541	18	212		267	226	206	262	256	210	256	240	215	96		532	194	500.361
																11	282	227	231	295	257	224	267	236	240	10	122	6	465	13	204		271	216	220	284	246	213	256	225	229	112		459	191	492.623
																12	297	262	218	271	254	233	279	297	212	12	107	7.2	514	11	207		285	250	206	259	242	221	267	285	200	95		506.8	196	505.519
																11	274	261	232	273	253	217	265	249	242	14	88	8.4	576	11	189		263	250	221	262	242	206	254	238	231	74		567.6	178	459.094
																7	293	224	225	272	255	207	279	251	201	18	113	10.8	554	9	226		286	217	218	265	248	200	272	244	194	95		543.2	217	559.682
																11	293	258	210	273	225	217	242	249	228	8	108	4.8	554	19	212		282	247	199	262	214	206	231	238	217	100		549.2	193	497.781
																16	289	262	218	298	270	223	247	264	212	8	97	4.8	561	6	183		273	246	202	282	254	207	231	248	196	89		556.2	177	456.515
																13	295	268	231	260	264	225	290	238	213	8	111	4.8	542	7	192		282	255	218	247	251	212	277	225	200	103		537.2	185	477.148
																8	296	291	206	318	264	244	269	251	220	10	99	6	550	13	220		288	283	198	310	256	236	261	243	212	89		544	207	533.89
																13	301	250	239	307	266	232	270	256	203	12	95	7.2	504	11	213		288	237	226	294	253	219	257	243	190	83		496.8	202	520.994
																13	309	253	222	240	271	241	277	241	204	10	96	6	542	12	215		296	240	209	227	258	228	264	228	191	86		536	203	523.573
																9	291	275	251	281	268	210	297	261	202	12	96	7.2	570	10	165		282	266	242	272	259	201	288	252	193	84		562.8	155	399.773
																11	276	274	223	287	252	218	285	244	235	12	89	7.2	511	6	195		265	263	212	276	241	207	274	233	224	77		503.8	189	487.465
																9	284	259	224	288	276	237	290	272	244	4	117	2.4	513	16	224		275	250	215	279	267	228	281	263	235	113		510.6	208	536.469
																4	281	255	253	276	243	197	268	223	214	12	119	7.2	532	7	206		277	251	249	272	239	193	264	219	210	107		524.8	199	513.256
																10	274	248	237	261	236	230	294	285	195	10	114	6	533	15	192		264	238	227	251	226	220	284	275	185	104		527	177	456.515
																10	296	257	203	278	249	255	277	241	209	7	107	4.2	531	11	204		286	247	193	268	239	245	267	231	199	100		526.8	193	497.781
																6	302	258	275	306	259	210	261	247	223	13	116	7.8	552	7	200		296	252	269	300	253	204	255	241	217	103		544.2	193	497.781
																12	294	241	228	283	264	225	277	242	234	23	104	13.8	505	13	202		282	229	216	271	252	213	265	230	222	81		491.2	189	487.465
																9	300	254	224	312	250	238	271	236	239	10	98	6	555	11	192		291	245	215	303	241	229	262	227	230	88		549	181	466.831
																11	296	240	246	306	213	229	263	237	241	8	110	4.8	549	12	197		285	229	235	295	202	218	252	226	230	102		544.2	185	477.148
																9	300	222	245	293	287	211	299	252	218	14	106	8.4	534	10	217		291	213	236	284	278	202	290	243	209	92		525.6	207	533.89
																16	278	248	239	275	263	228	269	238	216	11	101	6.6	555	13	201		262	232	223	259	247	212	253	222	200	90		548.4	188	484.886
																11	286	243	246	291	256	225	274	247	218	9	105	5.4	576	9	198		275	232	235	280	245	214	263	236	207	96		570.6	189	487.465
																13	286	272	203	309	262	206	254	269	223	8	122	4.8	521	14	203		273	259	190	296	249	193	241	256	210	114		516.2	189	487.465
																13	280	259	256	287	248	218	274	255	243	14	86	8.4	507	13	199		267	246	243	274	235	205	261	242	230	72		498.6	186	479.727
																6	281	272	199	282	261	212	259	234	223	13	106	7.8	529	11	175		275	266	193	276	255	206	253	228	217	93		521.2	164	422.985
																16	272	283	236	286	258	232	271	245	249	8	112	4.8	534	6	215		256	267	220	270	242	216	255	229	233	104		529.2	209	539.048
																12	284	253	224	269	258	225	263	228	221	4	96	2.4	551	9	212		272	241	212	257	246	213	251	216	209	92		548.6	203	523.573
																13	304	272	200	305	250	222	259	261	212	16	110	9.6	602	13	209		291	259	187	292	237	209	246	248	199	94		592.4	196	505.519
																9	298	227	222	315	274	225	273	251	217	13	96	7.8	547	13	202		289	218	213	306	265	216	264	242	208	83		539.2	189	487.465
																10	298	271	235	302	270	222	251	229	219	14	121	8.4	509	11	205		288	261	225	292	260	212	241	219	209	107		500.6	194	500.361
																9	294	240	246	285	242	210	273	253	257	10	106	6	509	9	206		285	231	237	276	233	201	264	244	248	96		503	197	508.098
																13	268	257	223	281	244	266	286	232	214	18	109	10.8	555	9	206		255	244	210	268	231	253	273	219	201	91		544.2	197	508.098
																9	281	254	235	260	262	223	257	242	206	12	109	7.2	564	14	209		272	245	226	251	253	214	248	233	197	97		556.8	195	502.94
																10	303	242	240	287	262	208	281	230	221	15	113	9	547	7	194		293	232	230	277	252	198	271	220	211	98		538	187	482.306
																10	264	262	262	258	271	246	253	251	213	7	117	4.2	545	13	211		254	252	252	248	261	236	243	241	203	110		540.8	198	510.677
																12	306	293	248	296	272	218	277	249	229	9	110	5.4	541	8	183		294	281	236	284	260	206	265	237	217	101		535.6	175	451.356
																5	309	259	222	277	274	230	324	277	236	15	105	9	547	9	184		304	254	217	272	269	225	319	272	231	90		538	175	451.356
																31	298	282	238	296	298	244	296	236	221	16	136	9.6	545	19	205		267	251	207	265	267	213	265	205	190	120		535.4	186	479.727
																18	283	282	240	293	267	233	336	266	242	27	111	16.2	522	29	208		265	264	222	275	249	215	318	248	224	84		505.8	179	461.673
																24	294	306	257	302	299	239	284	264	246	38	126	22.8	583	20	237		270	282	233	278	275	215	260	240	222	88		560.2	217	559.682
																29	329	269	258	326	272	248	299	270	231	29	134	17.4	541	49	231		300	240	229	297	243	219	270	241	202	105		523.6	182	469.41
																29	317	286	249	301	284	233	293	275	231	30	128	18	557	27	228		288	257	220	272	255	204	264	246	202	98		539	201	518.415
																19	323	280	271	316	267	236	291	253	223	20	110	12	529	27	196		304	261	252	297	248	217	272	234	204	90		517	169	435.881
																18	275	264	238	284	274	247	273	282	209	11	102	6.6	548	10	200		257	246	220	266	256	229	255	264	191	91		541.4	190	490.044
																12	314	259	266	289	273	228	284	255	214	8	106	4.8	526	14	208		302	247	254	277	261	216	272	243	202	98		521.2	194	500.361
																14	291	281	226	296	273	214	289	249	235	12	108	7.2	532	12	198		277	267	212	282	259	200	275	235	221	96		524.8	186	479.727
																14	299	276	220	297	293	210	260	246	220	11	92	6.6	559	9	206		285	262	206	283	279	196	246	232	206	81		552.4	197	508.098
																9	298	246	256	302	253	263	290	275	241	12	93	7.2	514	9	185		289	237	247	293	244	254	281	266	232	81		506.8	176	453.935
																9	301	291	210	273	283	227	265	247	243	12	98	7.2	562	7	193		292	282	201	264	274	218	256	238	234	86		554.8	186	479.727
																18	292	300	255	271	275	225	259	274	233	6	97	3.6	544	18	207		274	282	237	253	257	207	241	256	215	91		540.4	189	487.465
																9	305	292	254	315	264	241	305	250	232	10	100	6	532	14	219		296	283	245	306	255	232	296	241	223	90		526	205	528.732
																10	313	282	221	301	273	230	254	234	203	7	115	4.2	548	14	211		303	272	211	291	263	220	244	224	193	108		543.8	197	508.098
																7	319	298	232	287	245	221	269	254	214	13	92	7.8	527	8	215		312	291	225	280	238	214	262	247	207	79		519.2	207	533.89
																4	299	252	240	295	276	237	288	236	238	7	104	4.2	481	7	207		295	248	236	291	272	233	284	232	234	97		476.8	200	515.836
																11	326	245	247	299	283	237	261	247	211	13	98	7.8	525	13	221		315	234	236	288	272	226	250	236	200	85		517.2	208	536.469
																5	327	272	233	284	273	224	250	250	207	11	98	6.6	572	7	196		322	267	228	279	268	219	245	245	202	87		565.4	189	487.465
																8	290	263	263	306	288	244	280	248	225	10	122	6	534	11	196		282	255	255	298	280	236	272	240	217	112		528	185	477.148
																14	339	277	232	284	260	268	287	269	223	7	103	4.2	512	10	208		325	263	218	270	246	254	273	255	209	96		507.8	198	510.677
																14	304	268	231	322	260	225	281	243	229	10	85	6	512	8	210		290	254	217	308	246	211	267	229	215	75		506	202	520.994
																19	285	273	249	289	268	244	303	256	227	11	106	6.6	543	14	205		266	254	230	270	249	225	284	237	208	95		536.4	191	492.623
																7	292	270	240	253	249	219	264	241	238	13	116	7.8	552	12	187		285	263	233	246	242	212	257	234	231	103		544.2	175	451.356
																22	288	268	218	317	289	208	269	240	222	13	118	7.8	540	14	229		266	246	196	295	267	186	247	218	200	105		532.2	215	554.523
																16	318	272	232	321	254	235	284	255	227	26	122	15.6	564	9	216		302	256	216	305	238	219	268	239	211	96		548.4	207	533.89
																15	326	275	238	298	267	224	272	251	222	11	85	6.6	521	13	191		311	260	223	283	252	209	257	236	207	74		514.4	178	459.094
																15	294	268	238	291	262	243	313	285	231	19	121	11.4	553	20	202		279	253	223	276	247	228	298	270	216	102		541.6	182	469.41
																9	269	229	205	289	281	221	291	256	203	13	100	7.8	573	8	201		260	220	196	280	272	212	282	247	194	87		565.2	193	497.781
																11	286	253	222	307	274	256	266	273	214	6	104	3.6	587	9	216		275	242	211	296	263	245	255	262	203	98		583.4	207	533.89
																5	339	267	223	270	272	250	279	288	238	8	110	4.8	513	11	191		334	262	218	265	267	245	274	283	233	102		508.2	180	464.252
																10	290	278	242	308	290	232	291	253	229	6	103	3.6	566	10	181		280	268	232	298	280	222	281	243	219	97		562.4	171	441.039
																2	341	252	202	308	259	249	272	259	241	10	104	6	507	10	218		339	250	200	306	257	247	270	257	239	94		501	208	536.469
																4	293	255	264	287	248	238	328	263	247	10	112	6	502	12	217		289	251	260	283	244	234	324	259	243	102		496	205	528.732
																9	306	259	250	303	254	263	287	241	229	14	104	8.4	510	12	202		297	250	241	294	245	254	278	232	220	90		501.6	190	490.044
																11	330	247	241	276	294	258	293	248	230	9	101	5.4	552	8	224		319	236	230	265	283	247	282	237	219	92		546.6	216	557.103
																17	300	263	232	304	289	224	294	254	248	9	114	5.4	529	4	174		283	246	215	287	272	207	277	237	231	105		523.6	170	438.46
																4	331	290	237	316	250	229	278	264	257	8	115	4.8	537	7	200		327	286	233	312	246	225	274	260	253	107		532.2	193	497.781
																9	313	278	216	277	256	231	286	250	224	8	111	4.8	531	9	180		304	269	207	268	247	222	277	241	215	103		526.2	171	441.039
																10	319	248	234	281	257	245	308	262	216	8	125	4.8	506	8	196		309	238	224	271	247	235	298	252	206	117		501.2	188	484.886
																8	315	281	247	279	274	236	275	262	217	5	99	3	517	14	203		307	273	239	271	266	228	267	254	209	94		514	189	487.465
																10	329	266	238	333	262	232	317	256	215	18	99	10.8	531	9	211		319	256	228	323	252	222	307	246	205	81		520.2	202	520.994
																14	306	272	266	287	285	230	294	267	217	4	110	2.4	504	10	216		292	258	252	273	271	216	280	253	203	106		501.6	206	531.311
																10	308	263	276	292	276	257	275	255	216	10	100	6	560	7	215		298	253	266	282	266	247	265	245	206	90		554	208	536.469
																12	289	273	235	301	287	235	290	250	215	10	110	6	561	14	221		277	261	223	289	275	223	278	238	203	100		555	207	533.89
																9	337	259	231	289	282	229	292	265	247	3	107	1.8	484	10	187		328	250	222	280	273	220	283	256	238	104		482.2	177	456.515
																11	297	239	238	307	284	244	275	264	234	4	108	2.4	523	9	183		286	228	227	296	273	233	264	253	223	104		520.6	174	448.777
																10	303	295	244	338	277	221	277	254	210	7	94	4.2	524	10	201		293	285	234	328	267	211	267	244	200	87		519.8	191	492.623
																14	285	302	238	359	284	238	304	239	212	5	119	3	527	9	171		271	288	224	345	270	224	290	225	198	114		524	162	417.827
																8	306	297	239	304	264	254	263	276	214	7	107	4.2	526	10	204		298	289	231	296	256	246	255	268	206	100		521.8	194	500.361
																13	288	289	235	304	242	257	318	240	233	8	106	4.8	553	12	206		275	276	222	291	229	244	305	227	220	98		548.2	194	500.361
																12	286	302	289	314	271	232	312	273	266	7	118	4.2	519	9	200		274	290	277	302	259	220	300	261	254	111		514.8	191	492.623
																7	299	293	252	295	269	251	322	245	259	11	99	6.6	553	6	233		292	286	245	288	262	244	315	238	252	88		546.4	227	585.473
																6	293	289	255	305	271	246	289	273	271	6	108	3.6	555	11	192		287	283	249	299	265	240	283	267	265	102		551.4	181	466.831
																11	312	269	219	294	263	239	263	282	239	13	90	7.8	559	7	180		301	258	208	283	252	228	252	271	228	77		551.2	173	446.198
																13	305	318	234	322	304	235	277	282	215	6	134	3.6	481	9	209		292	305	221	309	291	222	264	269	202	128		477.4	200	515.836
																6	283	269	264	319	265	242	288	270	219	5	108	3	579	9	207		277	263	258	313	259	236	282	264	213	103		576	198	510.677
																12	308	249	234	302	275	256	289	286	229	7	108	4.2	522	10	203		296	237	222	290	263	244	277	274	217	101		517.8	193	497.781
																10	262	280	249	332	244	248	289	269	238	10	102	6	566	9	217		252	270	239	322	234	238	279	259	228	92		560	208	536.469
																11	310	278	254	334	249	234	252	294	254	9	103	5.4	542	8	208		299	267	243	323	238	223	241	283	243	94		536.6	200	515.836
																13	323	284	249	297	298	243	286	278	252	10	124	6	603	4	212		310	271	236	284	285	230	273	265	239	114		597	208	536.469
																9	274	280	247	315	283	206	279	242	233	12	115	7.2	529	8	199		265	271	238	306	274	197	270	233	224	103		521.8	191	492.623
																8	312	258	236	287	260	250	301	271	243	15	122	9	511	14	217		304	250	228	279	252	242	293	263	235	107		502	203	523.573
																11	316	293	290	283	247	253	317	274	226	12	97	7.2	495	9	203		305	282	279	272	236	242	306	263	215	85		487.8	194	500.361
																12	306	309	257	310	277	240	274	250	259	11	101	6.6	573	16	195		294	297	245	298	265	228	262	238	247	90		566.4	179	461.673
																11	289	263	247	309	286	223	267	264	249	6	100	3.6	558	14	234		278	252	236	298	275	212	256	253	238	94		554.4	220	567.419
																6	331	262	241	313	258	244	281	259	239	8	101	4.8	545	8	222		325	256	235	307	252	238	275	253	233	93		540.2	214	551.944
																12	312	257	239	321	261	264	303	257	274	14	96	8.4	527	9	219		300	245	227	309	249	252	291	245	262	82		518.6	210	541.627
																9	318	259	226	323	248	203	277	257	253	9	119	5.4	545	7	199		309	250	217	314	239	194	268	248	244	110		539.6	192	495.202
																9	304	272	250	306	281	243	296	291	254	8	112	4.8	531	6	229		295	263	241	297	272	234	287	282	245	104		526.2	223	575.157
																13	313	241	247	306	281	263	295	282	235	8	91	4.8	519	8	194		300	228	234	293	268	250	282	269	222	83		514.2	186	479.727
																7	297	260	253	295	262	233	305	248	229	11	131	6.6	549	9	198		290	253	246	288	255	226	298	241	222	120		542.4	189	487.465
																7	316	257	251	316	291	240	296	284	246	6	127	3.6	552	9	214		309	250	244	309	284	233	289	277	239	121		548.4	205	528.732
																9	311	288	234	297	275	245	288	260	244	11	102	6.6	583	13	183		302	279	225	288	266	236	279	251	235	91		576.4	170	438.46
																15	315	272	275	322	282	249	276	268	232	13	116	7.8	527	12	197		300	257	260	307	267	234	261	253	217	103		519.2	185	477.148
																8	306	276	225	289	278	239	302	276	246	11	107	6.6	546	4	225		298	268	217	281	270	231	294	268	238	96		539.4	221	569.998
																14	330	279	266	314	302	235	299	253	230	5	99	3	547	10	179		316	265	252	300	288	221	285	239	216	94		544	169	435.881
																7	341	291	258	313	257	227	283	251	223	12	112	7.2	579	9	200		334	284	251	306	250	220	276	244	216	100		571.8	191	492.623
																5	313	277	210	321	280	238	263	281	242	9	130	5.4	535	12	206		308	272	205	316	275	233	258	276	237	121		529.6	194	500.361
																13	270	285	246	315	256	232	311	278	259	8	90	4.8	560	13	228		257	272	233	302	243	219	298	265	246	82		555.2	215	554.523
																13	308	272	245	320	315	218	305	257	214	9	109	5.4	556	12	201		295	259	232	307	302	205	292	244	201	100		550.6	189	487.465
																15	303	294	243	293	258	255	267	252	247	10	103	6	540	5	209		288	279	228	278	243	240	252	237	232	93		534	204	526.152
																11	319	271	261	300	274	236	296	251	236	12	104	7.2	572	10	197		308	260	250	289	263	225	285	240	225	92		564.8	187	482.306
																9	310	303	243	314	275	286	326	260	232	12	98	7.2	574	7	206		301	294	234	305	266	277	317	251	223	86		566.8	199	513.256
																7	288	258	239	317	294	252	304	263	229	17	109	10.2	525	15	201		281	251	232	310	287	245	297	256	222	92		514.8	186	479.727
																16	303	288	271	310	311	233	272	273	232	8	103	4.8	582	2	232		287	272	255	294	295	217	256	257	216	95		577.2	230	593.211
																8	311	265	253	305	259	239	307	292	234	11	125	6.6	582	3	189		303	257	245	297	251	231	299	284	226	114		575.4	186	479.727
																7	282	283	264	299	263	257	308	280	271	4	94	2.4	566	9	216		275	276	257	292	256	250	301	273	264	90		563.6	207	533.89
																16	346	282	229	299	303	279	312	250	248	7	105	4.2	512	6	185		330	266	213	283	287	263	296	234	232	98		507.8	179	461.673
																15	344	294	248	291	265	266	309	272	219	5	112	3	576	11	218		329	279	233	276	250	251	294	257	204	107		573	207	533.89
																7	346	310	243	307	274	262	309	282	221	2	96	1.2	528	14	226		339	303	236	300	267	255	302	275	214	94		526.8	212	546.786
																11	311	301	261	307	274	246	304	273	226	11	86	6.6	558	5	200		300	290	250	296	263	235	293	262	215	75		551.4	195	502.94
																11	308	285	229	337	289	262	302	249	246	6	107	3.6	549	10	189		297	274	218	326	278	251	291	238	235	101		545.4	179	461.673
																5	303	258	242	320	237	278	311	279	241	6	109	3.6	556	11	214		298	253	237	315	232	273	306	274	236	103		552.4	203	523.573
																9	308	261	250	297	273	232	287	258	223	12	95	7.2	530	6	224		299	252	241	288	264	223	278	249	214	83		522.8	218	562.261
																12	306	280	237	272	303	249	293	285	206	3	126	1.8	511	6	176		294	268	225	260	291	237	281	273	194	123		509.2	170	438.46
																4	343	283	296	339	285	245	279	267	225	7	114	4.2	531	19	187		339	279	292	335	281	241	275	263	221	107		526.8	168	433.302
																9	304	281	249	302	310	269	287	262	230	4	103	2.4	567	8	212		295	272	240	293	301	260	278	253	221	99		564.6	204	526.152
																8	320	286	259	294	278	258	281	270	228	5	107	3	526	6	212		312	278	251	286	270	250	273	262	220	102		523	206	531.311
																9	293	281	253	322	323	249	290	274	230	11	113	6.6	548	6	199		284	272	244	313	314	240	281	265	221	102		541.4	193	497.781
																7	319	296	246	346	287	238	306	290	262	12	123	7.2	555	7	202		312	289	239	339	280	231	299	283	255	111		547.8	195	502.94
																7	305	249	252	301	289	251	311	276	231	6	118	3.6	557	5	190		298	242	245	294	282	244	304	269	224	112		553.4	185	477.148
																8	338	299	253	327	278	258	266	271	262	9	113	5.4	575	7	192		330	291	245	319	270	250	258	263	254	104		569.6	185	477.148
																6	322	277	262	326	313	281	305	243	252	10	103	6	563	8	232		316	271	256	320	307	275	299	237	246	93		557	224	577.736
																11	315	315	249	312	299	272	274	285	251	8	111	4.8	542	8	206		304	304	238	301	288	261	263	274	240	103		537.2	198	510.677
																5	339	259	241	316	282	234	293	262	242	11	94	6.6	542	14	190		334	254	236	311	277	229	288	257	237	83		535.4	176	453.935
																8	300	298	250	314	275	248	301	263	250	11	110	6.6	594	12	221		292	290	242	306	267	240	293	255	242	99		587.4	209	539.048
																10	322	268	285	331	301	227	254	289	253	4	113	2.4	550	15	216		312	258	275	321	291	217	244	279	243	109		547.6	201	518.415
																8	328	284	274	306	256	279	336	279	256	7	101	4.2	525	14	206		320	276	266	298	248	271	328	271	248	94		520.8	192	495.202
																15	315	310	247	323	276	259	280	283	257	10	110	6	516	4	214		300	295	232	308	261	244	265	268	242	100		510	210	541.627
																6	310	293	244	318	317	261	316	268	266	12	133	7.2	557	13	190		304	287	238	312	311	255	310	262	260	121		549.8	177	456.515
																8	344	275	265	333	283	234	333	298	244	6	99	3.6	523	9	205		336	267	257	325	275	226	325	290	236	93		519.4	196	505.519
																7	323	271	262	322	292	280	300	262	256	10	123	6	546	12	206		316	264	255	315	285	273	293	255	249	113		540	194	500.361
																8	341	300	256	310	291	248	330	275	247	5	125	3	558	9	223		333	292	248	302	283	240	322	267	239	120		555	214	551.944
																16	305	311	260	299	282	252	281	267	233	10	107	6	561	11	220		289	295	244	283	266	236	265	251	217	97		555	209	539.048
																8	334	286	283	349	277	263	289	274	260	11	104	6.6	517	5	210		326	278	275	341	269	255	281	266	252	93		510.4	205	528.732
																9	315	310	254	310	295	240	334	297	259	8	102	4.8	524	8	232		306	301	245	301	286	231	325	288	250	94		519.2	224	577.736
																6	314	290	240	320	305	265	298	290	245	4	132	2.4	563	12	227		308	284	234	314	299	259	292	284	239	128		560.6	215	554.523
																12	353	272	251	295	281	267	275	280	236	6	105	3.6	532	10	180		341	260	239	283	269	255	263	268	224	99		528.4	170	438.46
																9	325	291	232	322	327	249	336	273	234	8	103	4.8	551	10	231		316	282	223	313	318	240	327	264	225	95		546.2	221	569.998
																7	298	284	290	326	288	262	324	276	242	7	109	4.2	589	5	234		291	277	283	319	281	255	317	269	235	102		584.8	229	590.632
																12	331	311	257	321	278	273	300	308	232	8	97	4.8	575	10	193		319	299	245	309	266	261	288	296	220	89		570.2	183	471.99
																8	312	308	254	311	298	251	309	262	244	14	105	8.4	547	11	234		304	300	246	303	290	243	301	254	236	91		538.6	223	575.157
																8	302	256	241	315	275	245	308	286	248	13	102	7.8	545	16	220		294	248	233	307	267	237	300	278	240	89		537.2	204	526.152
																16	360	285	252	325	282	233	319	306	213	10	103	6	528	9	213		344	269	236	309	266	217	303	290	197	93		522	204	526.152
																6	311	268	261	349	317	255	307	288	227	12	121	7.2	566	8	216		305	262	255	343	311	249	301	282	221	109		558.8	208	536.469
																9	355	275	270	326	291	236	303	250	251	6	115	3.6	546	9	216		346	266	261	317	282	227	294	241	242	109		542.4	207	533.89
																9	334	293	260	308	325	254	299	282	235	8	119	4.8	530	7	205		325	284	251	299	316	245	290	273	226	111		525.2	198	510.677
																11	328	277	240	315	308	264	339	273	231	9	107	5.4	580	8	232		317	266	229	304	297	253	328	262	220	98		574.6	224	577.736
																11	336	302	277	324	278	257	313	259	241	10	108	6	576	8	222		325	291	266	313	267	246	302	248	230	98		570	214	551.944
																11	299	304	289	309	284	235	307	308	254	7	102	4.2	581	12	192		288	293	278	298	273	224	296	297	243	95		576.8	180	464.252
																13	332	300	259	332	274	264	290	245	249	8	115	4.8	559	9	212		319	287	246	319	261	251	277	232	236	107		554.2	203	523.573
																9	356	282	256	302	292	246	320	305	266	11	115	6.6	562	12	226		347	273	247	293	283	237	311	296	257	104		555.4	214	551.944
																9	316	301	245	298	275	271	358	283	213	8	101	4.8	560	10	214		307	292	236	289	266	262	349	274	204	93		555.2	204	526.152
																10	299	260	238	308	304	242	297	265	259	7	99	4.2	563	2	203		289	250	228	298	294	232	287	255	249	92		558.8	201	518.415
																8	352	282	240	313	302	249	319	309	233	10	106	6	555	5	196		344	274	232	305	294	241	311	301	225	96		549	191	492.623
																13	348	258	248	360	303	257	317	269	258	6	113	3.6	543	12	216		335	245	235	347	290	244	304	256	245	107		539.4	204	526.152
																7	287	295	271	303	315	245	342	291	242	7	100	4.2	549	7	203		280	288	264	296	308	238	335	284	235	93		544.8	196	505.519
																2	344	337	218	327	282	237	299	292	265	4	121	2.4	553	8	231		342	335	216	325	280	235	297	290	263	117		550.6	223	575.157
																15	319	293	270	304	295	268	315	292	271	8	94	4.8	544	5	202		304	278	255	289	280	253	300	277	256	86		539.2	197	508.098
																9	329	301	275	338	294	255	291	253	257	6	114	3.6	565	9	219		320	292	266	329	285	246	282	244	248	108		561.4	210	541.627
																6	331	269	248	327	301	281	307	264	273	10	100	6	572	12	218		325	263	242	321	295	275	301	258	267	90		566	206	531.311
																2	315	311	231	341	302	242	308	274	264	10	98	6	578	9	199		313	309	229	339	300	240	306	272	262	88		572	190	490.044
																17	344	292	263	322	279	250	321	265	265	11	104	6.6	530	8	232		327	275	246	305	262	233	304	248	248	93		523.4	224	577.736
																6	342	272	261	323	292	286	340	306	249	4	93	2.4	534	7	216		336	266	255	317	286	280	334	300	243	89		531.6	209	539.048
																16	305	275	238	323	292	264	332	296	234	7	119	4.2	551	16	215		289	259	222	307	276	248	316	280	218	112		546.8	199	513.256
																13	339	330	282	316	280	257	326	300	230	12	108	7.2	515	10	198		326	317	269	303	267	244	313	287	217	96		507.8	188	484.886
																10	356	306	283	318	277	240	325	301	246	11	108	6.6	591	6	200		346	296	273	308	267	230	315	291	236	97		584.4	194	500.361
																7	316	292	257	356	304	260	296	260	269	11	125	6.6	573	7	220		309	285	250	349	297	253	289	253	262	114		566.4	213	549.365
																12	320	290	264	350	295	244	307	312	216	8	92	4.8	536	13	214		308	278	252	338	283	232	295	300	204	84		531.2	201	518.415
																16	320	288	245	372	293	260	325	273	254	7	112	4.2	547	7	215		304	272	229	356	277	244	309	257	238	105		542.8	208	536.469
																11	355	280	273	317	299	287	298	274	251	9	139	5.4	573	14	208		344	269	262	306	288	276	287	263	240	130		567.6	194	500.361
																7	331	304	261	322	309	266	306	287	259	15	95	9	571	11	181		324	297	254	315	302	259	299	280	252	80		562	170	438.46
																8	340	288	277	352	325	290	309	304	234	4	94	2.4	583	8	203		332	280	269	344	317	282	301	296	226	90		580.6	195	502.94
																12	346	298	262	335	280	238	323	278	253	12	111	7.2	541	8	211		334	286	250	323	268	226	311	266	241	99		533.8	203	523.573
																6	382	290	246	328	324	240	303	272	246	3	98	1.8	590	5	234		376	284	240	322	318	234	297	266	240	95		588.2	229	590.632
																11	325	288	263	322	269	269	315	275	228	11	121	6.6	565	2	227		314	277	252	311	258	258	304	264	217	110		558.4	225	580.315
																8	308	309	249	328	283	254	320	293	261	11	113	6.6	558	10	206		300	301	241	320	275	246	312	285	253	102		551.4	196	505.519
																14	325	315	256	329	281	272	323	298	221	7	123	4.2	553	8	194		311	301	242	315	267	258	309	284	207	116		548.8	186	479.727
																8	349	294	248	318	286	271	333	286	253	6	109	3.6	548	6	199		341	286	240	310	278	263	325	278	245	103		544.4	193	497.781
																9	341	279	279	308	299	253	340	251	227	7	128	4.2	536	6	227		332	270	270	299	290	244	331	242	218	121		531.8	221	569.998
																9	371	298	243	311	298	265	323	249	281	13	108	7.8	553	5	200		362	289	234	302	289	256	314	240	272	95		545.2	195	502.94
																9	351	286	256	346	309	282	288	295	235	8	101	4.8	545	6	231		342	277	247	337	300	273	279	286	226	93		540.2	225	580.315
																8	320	289	301	351	300	280	303	278	248	9	113	5.4	553	11	195		312	281	293	343	292	272	295	270	240	104		547.6	184	474.569
																8	351	294	247	310	302	253	303	276	267	9	100	5.4	532	2	214		343	286	239	302	294	245	295	268	259	91		526.6	212	546.786
																8	358	316	275	313	301	279	286	265	226	4	110	2.4	579	10	207		350	308	267	305	293	271	278	257	218	106		576.6	197	508.098
																7	334	296	274	304	286	248	289	294	247	10	99	6	538	11	202		327	289	267	297	279	241	282	287	240	89		532	191	492.623
																6	315	317	242	344	267	235	321	272	244	5	127	3	511	6	214		309	311	236	338	261	229	315	266	238	122		508	208	536.469
																13	308	319	261	324	290	278	309	273	279	10	107	6	547	12	199		295	306	248	311	277	265	296	260	266	97		541	187	482.306
																9	326	305	243	365	304	249	318	307	249	7	89	4.2	566	8	195		317	296	234	356	295	240	309	298	240	82		561.8	187	482.306
																13	320	283	266	321	301	247	331	271	221	4	90	2.4	583	11	220		307	270	253	308	288	234	318	258	208	86		580.6	209	539.048
																9	351	297	271	318	267	265	319	295	248	10	99	6	547	14	190		342	288	262	309	258	256	310	286	239	89		541	176	453.935
																10	330	336	269	344	288	255	314	259	236	7	113	4.2	561	6	218		320	326	259	334	278	245	304	249	226	106		556.8	212	546.786
																6	315	296	266	314	286	246	327	267	249	3	98	1.8	547	7	187		309	290	260	308	280	240	321	261	243	95		545.2	180	464.252
																6	342	286	267	353	298	265	310	279	241	10	93	6	575	8	214		336	280	261	347	292	259	304	273	235	83		569	206	531.311
																6	318	291	265	306	299	268	287	274	254	7	100	4.2	584	7	186		312	285	259	300	293	262	281	268	248	93		579.8	179	461.673
																12	344	266	231	326	286	283	316	316	287	10	98	6	509	5	231		332	254	219	314	274	271	304	304	275	88		503	226	582.894
																11	342	292	281	287	284	249	297	290	222	15	112	9	531	10	227		331	281	270	276	273	238	286	279	211	97		522	217	559.682
																9	325	293	248	311	272	234	318	269	251	10	113	6	508	11	215		316	284	239	302	263	225	309	260	242	103		502	204	526.152
																6	307	280	249	303	282	259	339	260	259	11	111	6.6	584	11	221		301	274	243	297	276	253	333	254	253	100		577.4	210	541.627
																8	352	305	261	303	271	231	297	273	228	4	125	2.4	527	7	211		344	297	253	295	263	223	289	265	220	121		524.6	204	526.152
																8	370	273	224	297	275	260	325	284	236	7	108	4.2	551	8	199		362	265	216	289	267	252	317	276	228	101		546.8	191	492.623
																13	342	248	260	320	295	271	323	273	247	6	109	3.6	508	10	217		329	235	247	307	282	258	310	260	234	103		504.4	207	533.89
																10	331	290	250	324	278	251	311	284	242	9	93	5.4	520	10	219		321	280	240	314	268	241	301	274	232	84		514.6	209	539.048
																6	343	330	253	298	298	233	327	258	230	7	101	4.2	527	14	217		337	324	247	292	292	227	321	252	224	94		522.8	203	523.573
																8	318	283	266	300	274	240	288	277	231	12	114	7.2	553	7	192		310	275	258	292	266	232	280	269	223	102		545.8	185	477.148
																2	315	270	269	329	314	242	293	246	262	6	110	3.6	563	5	215		313	268	267	327	312	240	291	244	260	104		559.4	210	541.627
																16	317	279	272	320	263	221	317	268	239	10	101	6	539	10	230		301	263	256	304	247	205	301	252	223	91		533	220	567.419
																6	334	293	231	326	248	247	297	245	249	11	116	6.6	554	6	195		328	287	225	320	242	241	291	239	243	105		547.4	189	487.465
																13	322	296	262	314	262	258	285	261	236	7	107	4.2	545	6	205		309	283	249	301	249	245	272	248	223	100		540.8	199	513.256
																1	324	297	224	292	305	258	304	264	258	6	153	3.6	539	7	203		323	296	223	291	304	257	303	263	257	147		535.4	196	505.519
																7	316	297	276	297	276	245	307	291	257	7	102	4.2	516	8	235		309	290	269	290	269	238	300	284	250	95		511.8	227	585.473
																11	329	252	248	310	274	241	289	266	240	13	92	7.8	560	9	208		318	241	237	299	263	230	278	255	229	79		552.2	199	513.256
																9	293	304	223	289	297	257	329	302	233	11	114	6.6	538	7	192		284	295	214	280	288	248	320	293	224	103		531.4	185	477.148
																12	322	296	239	311	271	231	304	257	248	15	98	9	551	19	216		310	284	227	299	259	219	292	245	236	83		542	197	508.098
																18	291	261	233	297	323	244	319	254	231	13	125	7.8	528	14	210		273	243	215	279	305	226	301	236	213	112		520.2	196	505.519
																24	308	297	264	369	322	294	298	294	238	16	118	9.6	514	15	208		284	273	240	345	298	270	274	270	214	102		504.4	193	497.781
																16	341	269	261	285	303	236	255	254	234	20	116	12	555	16	196		325	253	245	269	287	220	239	238	218	96		543	180	464.252
																14	311	252	250	326	284	227	283	292	257	21	132	12.6	523	16	213		297	238	236	312	270	213	269	278	243	111		510.4	197	508.098
																16	328	259	256	322	299	251	275	243	223	13	98	7.8	492	12	202		312	243	240	306	283	235	259	227	207	85		484.2	190	490.044
																16	282	256	260	273	273	240	306	275	238	9	98	5.4	555	14	173		266	240	244	257	257	224	290	259	222	89		549.6	159	410.089
																11	298	271	266	290	266	212	266	266	228	10	99	6	505	6	201		287	260	255	279	255	201	255	255	217	89		499	195	502.94
																14	324	244	212	272	254	209	244	275	201	8	104	4.8	495	7	188		310	230	198	258	240	195	230	261	187	96		490.2	181	466.831
																9	261	263	251	264	249	242	262	239	213	13	107	7.8	495	7	199		252	254	242	255	240	233	253	230	204	94		487.2	192	495.202
																8	276	248	218	246	244	206	269	242	227	5	105	3	506	8	192		268	240	210	238	236	198	261	234	219	100		503	184	474.569
																7	276	252	191	258	245	222	249	216	228	7	110	4.2	454	6	172		269	245	184	251	238	215	242	209	221	103		449.8	166	428.144
																11	255	243	221	275	215	206	281	246	220	11	77	6.6	450	10	204		244	232	210	264	204	195	270	235	209	66		443.4	194	500.361
																8	285	231	176	258	246	209	260	254	212	6	96	3.6	490	11	178		277	223	168	250	238	201	252	246	204	90		486.4	167	430.723
																12	247	239	212	284	262	217	252	231	206	8	84	4.8	462	11	175		235	227	200	272	250	205	240	219	194	76		457.2	164	422.985
																9	241	235	187	236	247	230	214	216	200	8	99	4.8	450	7	168		232	226	178	227	238	221	205	207	191	91		445.2	161	415.248
																7	279	207	196	247	238	177	224	234	212	6	102	3.6	484	7	179		272	200	189	240	231	170	217	227	205	96		480.4	172	443.619
																9	230	223	183	240	237	169	245	207	183	12	71	7.2	516	8	210		221	214	174	231	228	160	236	198	174	59		508.8	202	520.994
																11	248	190	204	253	236	168	245	208	202	8	102	4.8	468	7	176		237	179	193	242	225	157	234	197	191	94		463.2	169	435.881
																10	255	203	186	245	214	191	216	211	174	10	114	6	493	7	171		245	193	176	235	204	181	206	201	164	104		487	164	422.985
																3	240	234	178	205	212	183	232	199	167	7	97	4.2	461	11	178		237	231	175	202	209	180	229	196	164	90		456.8	167	430.723
																11	228	225	174	259	214	189	210	193	194	4	106	2.4	473	5	168		217	214	163	248	203	178	199	182	183	102		470.6	163	420.406
																9	208	220	193	263	193	187	222	193	171	4	87	2.4	422	3	175		199	211	184	254	184	178	213	184	162	83		419.6	172	443.619
																10	213	199	178	250	196	180	216	195	168	7	102	4.2	466	8	201		203	189	168	240	186	170	206	185	158	95		461.8	193	497.781
																11	212	208	186	223	223	188	198	197	185	7	93	4.2	459	5	170		201	197	175	212	212	177	187	186	174	86		454.8	165	425.564
																8	244	211	164	215	196	220	186	189	179	11	101	6.6	452	7	172		236	203	156	207	188	212	178	181	171	90		445.4	165	425.564
																8	226	193	193	184	225	185	243	170	155	9	74	5.4	460	8	205		218	185	185	176	217	177	235	162	147	65		454.6	197	508.098
																10	217	215	199	224	199	186	192	177	178	4	94	2.4	478	7	144		207	205	189	214	189	176	182	167	168	90		475.6	137	353.347
																6	208	209	193	213	201	177	219	163	170	3	104	1.8	425	4	152		202	203	187	207	195	171	213	157	164	101		423.2	148	381.718
																2	174	205	180	229	208	177	202	175	148	3	82	1.8	436	8	136		172	203	178	227	206	175	200	173	146	79		434.2	128	330.135
																6	197	191	165	223	176	170	210	173	148	4	97	2.4	459	10	165		191	185	159	217	170	164	204	167	142	93		456.6	155	399.773
																9	205	184	191	202	197	195	217	164	146	13	86	7.8	440	6	171		196	175	182	193	188	186	208	155	137	73		432.2	165	425.564
																8	213	181	162	195	196	171	215	188	138	7	97	4.2	406	6	153		205	173	154	187	188	163	207	180	130	90		401.8	147	379.139
																10	205	211	164	207	194	164	190	207	164	4	86	2.4	437	7	181		195	201	154	197	184	154	180	197	154	82		434.6	174	448.777
																9	203	168	140	201	193	157	230	165	151	8	90	4.8	425	10	165		194	159	131	192	184	148	221	156	142	82		420.2	155	399.773
																10	219	204	161	237	202	157	214	179	164	4	92	2.4	459	4	156		209	194	151	227	192	147	204	169	154	88		456.6	152	392.035
																11	212	184	164	216	161	149	196	182	158	7	83	4.2	405	12	164		201	173	153	205	150	138	185	171	147	76		400.8	152	392.035
																6	182	205	158	192	187	158	200	182	169	6	88	3.6	422	3	166		176	199	152	186	181	152	194	176	163	82		418.4	163	420.406
																9	205	169	169	203	188	141	174	177	159	8	92	4.8	436	10	163		196	160	160	194	179	132	165	168	150	84		431.2	153	394.614
																3	172	179	148	182	166	152	186	167	157	9	103	5.4	396	12	155		169	176	145	179	163	149	183	164	154	94		390.6	143	368.823
																6	215	186	151	201	174	158	189	158	158	7	88	4.2	453	3	160		209	180	145	195	168	152	183	152	152	81		448.8	157	404.931
																5	193	179	154	201	178	169	197	165	163	6	119	3.6	399	6	183		188	174	149	196	173	164	192	160	158	113		395.4	177	456.515
																8	162	173	164	198	182	171	193	148	159	9	106	5.4	439	8	175		154	165	156	190	174	163	185	140	151	97		433.6	167	430.723
																6	203	163	157	204	160	141	188	163	141	6	88	3.6	401	3	155		197	157	151	198	154	135	182	157	135	82		397.4	152	392.035
																4	198	164	158	204	190	137	217	148	166	8	86	4.8	382	8	153		194	160	154	200	186	133	213	144	162	78		377.2	145	373.981
																9	206	161	140	206	171	166	192	152	155	12	84	7.2	433	3	170		197	152	131	197	162	157	183	143	146	72		425.8	167	430.723
																7	207	169	156	170	145	157	197	173	130	4	85	2.4	389	7	170		200	162	149	163	138	150	190	166	123	81		386.6	163	420.406
																5	227	163	156	177	166	146	184	154	150	5	81	3	394	8	186		222	158	151	172	161	141	179	149	145	76		391	178	459.094
																7	181	180	150	183	152	124	175	158	143	9	84	5.4	427	6	142		174	173	143	176	145	117	168	151	136	75		421.6	136	350.768
																8	163	155	147	191	150	165	196	186	151	6	96	3.6	397	9	182		155	147	139	183	142	157	188	178	143	90		393.4	173	446.198
																6	194	142	149	169	186	170	184	170	132	8	104	4.8	438	5	144		188	136	143	163	180	164	178	164	126	96		433.2	139	358.506
																7	184	170	147	179	159	157	173	154	161	7	99	4.2	425	7	161		177	163	140	172	152	150	166	147	154	92		420.8	154	397.193
																4	200	154	157	185	159	148	172	156	148	9	78	5.4	407	7	160		196	150	153	181	155	144	168	152	144	69		401.6	153	394.614
																9	166	162	142	165	179	130	161	124	133	8	96	4.8	397	13	154		157	153	133	156	170	121	152	115	124	88		392.2	141	363.664
																6	181	174	134	162	170	157	171	154	130	6	86	3.6	384	4	140		175	168	128	156	164	151	165	148	124	80		380.4	136	350.768
																6	170	156	142	171	155	151	167	143	153	6	93	3.6	398	3	144		164	150	136	165	149	145	161	137	147	87		394.4	141	363.664
																6	182	141	142	187	169	130	173	140	137	6	90	3.6	396	9	131		176	135	136	181	163	124	167	134	131	84		392.4	122	314.66
																3	182	155	130	171	154	161	174	167	152	7	79	4.2	412	6	152		179	152	127	168	151	158	171	164	149	72		407.8	146	376.56
																3	173	153	127	182	174	140	174	158	145	3	80	1.8	423	4	162		170	150	124	179	171	137	171	155	142	77		421.2	158	407.51
																7	211	163	138	189	159	148	172	155	157	12	88	7.2	421	16	134		204	156	131	182	152	141	165	148	150	76		413.8	118	304.343
																17	179	162	136	174	168	162	171	139	107	9	87	5.4	399	18	164		162	145	119	157	151	145	154	122	90	78		393.6	146	376.56
																18	172	166	156	205	168	145	163	146	149	20	107	12	388	28	173		154	148	138	187	150	127	145	128	131	87		376	145	373.981
																27	197	174	159	190	167	157	192	177	146	30	119	18	380	26	181		170	147	132	163	140	130	165	150	119	89		362	155	399.773
																37	215	182	174	231	199	166	195	166	152	34	111	20.4	445	35	199		178	145	137	194	162	129	158	129	115	77		424.6	164	422.985
																43	207	175	195	213	181	174	219	188	173	37	117	22.2	417	45	187		164	132	152	170	138	131	176	145	130	80		394.8	142	366.243
																39	179	199	158	232	196	171	182	167	161	30	113	18	428	43	158		140	160	119	193	157	132	143	128	122	83		410	115	296.606
																33	181	167	175	175	182	173	171	170	152	18	82	10.8	385	29	175		148	134	142	142	149	140	138	137	119	64		374.2	146	376.56
																18	193	173	156	181	167	141	171	156	158	20	99	12	377	13	152		175	155	138	163	149	123	153	138	140	79		365	139	358.506
																14	187	166	164	155	180	145	174	164	145	13	81	7.8	402	8	145		173	152	150	141	166	131	160	150	131	68		394.2	137	353.347
																13	169	177	124	165	159	140	140	137	102	7	68	4.2	408	2	149		156	164	111	152	146	127	127	124	89	61		403.8	147	379.139
																8	182	132	146	178	154	131	149	127	116	7	90	4.2	396	9	142		174	124	138	170	146	123	141	119	108	83		391.8	133	343.031
																6	152	139	145	159	157	121	173	137	126	6	100	3.6	403	3	144		146	133	139	153	151	115	167	131	120	94		399.4	141	363.664
																9	175	187	123	141	155	129	163	131	134	9	90	5.4	391	7	142		166	178	114	132	146	120	154	122	125	81		385.6	135	348.189
																7	178	137	133	164	145	137	173	148	152	4	71	2.4	376	9	154		171	130	126	157	138	130	166	141	145	67		373.6	145	373.981
																8	178	155	129	168	172	140	174	139	127	13	81	7.8	385	3	151		170	147	121	160	164	132	166	131	119	68		377.2	148	381.718
																11	175	145	141	166	156	129	153	135	138	6	96	3.6	401	5	167		164	134	130	155	145	118	142	124	127	90		397.4	162	417.827
																7	184	144	124	169	131	132	147	144	135	8	88	4.8	434	6	134		177	137	117	162	124	125	140	137	128	80		429.2	128	330.135
																16	167	148	111	160	138	121	141	132	124	11	97	6.6	419	9	164		151	132	95	144	122	105	125	116	108	86		412.4	155	399.773
																7	161	166	137	187	156	128	162	147	136	8	91	4.8	373	4	153		154	159	130	180	149	121	155	140	129	83		368.2	149	384.298
																5	164	153	133	151	143	136	138	147	133	7	82	4.2	406	5	139		159	148	128	146	138	131	133	142	128	75		401.8	134	345.61
																5	150	137	126	164	164	139	166	159	112	9	87	5.4	382	8	143		145	132	121	159	159	134	161	154	107	78		376.6	135	348.189
																1	171	131	118	169	150	140	158	128	126	4	72	2.4	385	7	144		170	130	117	168	149	139	157	127	125	68		382.6	137	353.347
																9	179	169	120	155	149	119	140	164	118	8	76	4.8	360	5	139		170	160	111	146	140	110	131	155	109	68		355.2	134	345.61
																8	158	126	122	140	164	117	128	129	110	8	91	4.8	392	10	143		150	118	114	132	156	109	120	121	102	83		387.2	133	343.031
																12	195	147	133	153	165	116	140	154	117	7	87	4.2	424	9	144		183	135	121	141	153	104	128	142	105	80		419.8	135	348.189
																3	168	145	140	155	132	142	156	141	133	7	83	4.2	374	11	168		165	142	137	152	129	139	153	138	130	76		369.8	157	404.931
																9	166	140	138	147	151	156	136	159	130	5	74	3	370	10	158		157	131	129	138	142	147	127	150	121	69		367	148	381.718
																8	149	132	133	158	138	136	131	153	129	6	92	3.6	391	1	135		141	124	125	150	130	128	123	145	121	86		387.4	134	345.61
																6	170	145	114	161	149	125	140	127	136	5	97	3	380	2	172		164	139	108	155	143	119	134	121	130	92		377	170	438.46
																7	166	146	126	134	126	118	146	120	120	7	85	4.2	347	9	158		159	139	119	127	119	111	139	113	113	78		342.8	149	384.298
																4	153	160	120	139	132	127	163	114	129	7	88	4.2	361	4	159		149	156	116	135	128	123	159	110	125	81		356.8	155	399.773
																5	155	136	132	163	146	121	144	118	104	5	84	3	364	7	149		150	131	127	158	141	116	139	113	99	79		361	142	366.243
																10	150	144	105	157	126	121	153	136	116	7	83	4.2	394	7	144		140	134	95	147	116	111	143	126	106	76		389.8	137	353.347
																9	157	138	142	191	123	114	136	142	103	10	106	6	390	4	142		148	129	133	182	114	105	127	133	94	96		384	138	355.927
																6	159	145	139	168	144	119	148	142	116	3	85	1.8	409	4	142		153	139	133	162	138	113	142	136	110	82		407.2	138	355.927
																12	175	128	135	163	147	140	138	137	136	11	71	6.6	400	4	144		163	116	123	151	135	128	126	125	124	60		393.4	140	361.085
																6	160	149	112	159	128	120	143	117	115	4	85	2.4	392	9	113		154	143	106	153	122	114	137	111	109	81		389.6	104	268.235
																6	138	93	112	157	156	117	138	116	115	4	68	2.4	335	9	173		132	87	106	151	150	111	132	110	109	64		332.6	164	422.985
																6	158	140	120	163	150	112	151	117	109	6	86	3.6	367	1	163		152	134	114	157	144	106	145	111	103	80		363.4	162	417.827
																9	147	133	110	156	152	127	129	133	142	8	88	4.8	360	2	128		138	124	101	147	143	118	120	124	133	80		355.2	126	324.976
																7	139	108	136	156	140	111	153	141	110	5	85	3	374	6	147		132	101	129	149	133	104	146	134	103	80		371	141	363.664
																9	141	154	133	160	126	138	141	118	139	7	92	4.2	408	7	153		132	145	124	151	117	129	132	109	130	85		403.8	146	376.56
																10	183	117	121	130	145	125	148	122	127	7	88	4.2	350	4	147		173	107	111	120	135	115	138	112	117	81		345.8	143	368.823
																7	143	142	140	151	148	129	136	126	123	10	84	6	407	8	128		136	135	133	144	141	122	129	119	116	74		401	120	309.501
																6	132	136	89	148	133	126	131	121	103	6	100	3.6	361	8	138		126	130	83	142	127	120	125	115	97	94		357.4	130	335.293
																6	139	118	129	156	133	134	132	133	129	6	69	3.6	392	4	151		133	112	123	150	127	128	126	127	123	63		388.4	147	379.139
																8	158	142	122	165	128	121	148	125	108	8	86	4.8	359	12	159		150	134	114	157	120	113	140	117	100	78		354.2	147	379.139
																5	155	146	136	150	143	117	128	132	121	12	82	7.2	363	4	131		150	141	131	145	138	112	123	127	116	70		355.8	127	327.556
																8	153	139	124	172	130	106	125	134	96	7	74	4.2	375	6	152		145	131	116	164	122	98	117	126	88	67		370.8	146	376.56
																6	136	119	116	152	124	126	134	112	102	3	98	1.8	376	5	150		130	113	110	146	118	120	128	106	96	95		374.2	145	373.981
																8	140	129	105	139	147	127	145	115	126	4	81	2.4	331	7	153		132	121	97	131	139	119	137	107	118	77		328.6	146	376.56
																4	133	117	104	144	145	95	146	137	116	5	88	3	377	4	132		129	113	100	140	141	91	142	133	112	83		374	128	330.135
																5	160	131	117	138	154	117	152	127	114	4	99	2.4	351	6	146		155	126	112	133	149	112	147	122	109	95		348.6	140	361.085
																7	128	143	129	144	152	116	139	143	106	7	97	4.2	397	10	139		121	136	122	137	145	109	132	136	99	90		392.8	129	332.714
																5	128	127	113	136	138	135	137	138	139	4	91	2.4	384	1	151		123	122	108	131	133	130	132	133	134	87		381.6	150	386.877
																10	149	121	120	127	130	123	135	120	109	3	77	1.8	390	4	142		139	111	110	117	120	113	125	110	99	74		388.2	138	355.927
																8	164	120	128	148	136	109	133	113	116	8	82	4.8	378	5	138		156	112	120	140	128	101	125	105	108	74		373.2	133	343.031
																8	132	124	119	140	126	101	116	110	114	7	87	4.2	384	9	139		124	116	111	132	118	93	108	102	106	80		379.8	130	335.293
																8	145	127	121	147	140	110	144	124	114	8	85	4.8	345	10	150		137	119	113	139	132	102	136	116	106	77		340.2	140	361.085
																3	128	137	146	126	126	113	144	132	106	6	69	3.6	393	5	124		125	134	143	123	123	110	141	129	103	63		389.4	119	306.922
																6	149	123	138	132	131	104	130	138	103	7	84	4.2	365	10	148		143	117	132	126	125	98	124	132	97	77		360.8	138	355.927
																5	134	128	119	107	129	116	160	121	128	6	88	3.6	371	11	125		129	123	114	102	124	111	155	116	123	82		367.4	114	294.026
																9	146	125	138	135	148	114	125	111	135	3	85	1.8	371	8	155		137	116	129	126	139	105	116	102	126	82		369.2	147	379.139
																6	160	125	111	139	130	118	134	119	101	6	95	3.6	367	8	137		154	119	105	133	124	112	128	113	95	89		363.4	129	332.714
																6	143	126	117	139	137	100	141	121	112	9	80	5.4	366	3	116		137	120	111	133	131	94	135	115	106	71		360.6	113	291.447
																10	152	129	117	110	145	125	123	115	112	7	92	4.2	340	5	148		142	119	107	100	135	115	113	105	102	85		335.8	143	368.823
																7	110	125	98	121	113	114	146	114	108	10	95	6	332	5	141		103	118	91	114	106	107	139	107	101	85		326	136	350.768
																7	149	123	124	124	130	93	114	128	103	6	86	3.6	367	8	134		142	116	117	117	123	86	107	121	96	80		363.4	126	324.976
																4	116	108	105	150	128	116	123	112	109	6	75	3.6	380	8	156		112	104	101	146	124	112	119	108	105	69		376.4	148	381.718
																8	150	142	104	137	132	108	124	117	116	3	91	1.8	356	9	137		142	134	96	129	124	100	116	109	108	88		354.2	128	330.135
																7	131	131	104	147	121	101	129	131	99	3	96	1.8	346	4	119		124	124	97	140	114	94	122	124	92	93		344.2	115	296.606
																9	106	143	128	126	117	103	116	135	97	10	92	6	322	5	139		97	134	119	117	108	94	107	126	88	82		316	134	345.61
																8	133	146	107	141	144	126	122	113	118	5	99	3	361	1	152		125	138	99	133	136	118	114	105	110	94		358	151	389.456
																8	136	121	111	125	113	117	112	115	98	10	82	6	351	3	141		128	113	103	117	105	109	104	107	90	72		345	138	355.927
																5	142	115	94	126	137	125	135	113	86	4	72	2.4	375	6	144		137	110	89	121	132	120	130	108	81	68		372.6	138	355.927
																5	137	111	108	143	114	98	133	106	92	10	101	6	362	10	133		132	106	103	138	109	93	128	101	87	91		356	123	317.239
																7	143	116	108	123	108	103	129	109	83	5	71	3	327	8	139		136	109	101	116	101	96	122	102	76	66		324	131	337.872
																5	134	114	106	135	135	105	137	106	101	3	78	1.8	354	7	121		129	109	101	130	130	100	132	101	96	75		352.2	114	294.026
																8	122	117	110	132	126	115	143	84	105	5	108	3	353	11	130		114	109	102	124	118	107	135	76	97	103		350	119	306.922
																5	142	121	115	138	133	96	124	129	103	5	86	3	352	6	133		137	116	110	133	128	91	119	124	98	81		349	127	327.556
																10	140	121	107	150	117	99	121	108	105	7	88	4.2	342	9	137		130	111	97	140	107	89	111	98	95	81		337.8	128	330.135
																6	158	107	98	134	124	112	99	110	106	6	80	3.6	367	8	121		152	101	92	128	118	106	93	104	100	74		363.4	113	291.447
																4	123	115	112	122	104	112	108	102	107	3	75	1.8	317	6	117		119	111	108	118	100	108	104	98	103	72		315.2	111	286.289
																7	94	128	105	130	127	96	106	111	106	10	85	6	373	8	123		87	121	98	123	120	89	99	104	99	75		367	115	296.606
																4	126	118	91	134	118	114	124	92	105	6	100	3.6	376	5	140		122	114	87	130	114	110	120	88	101	94		372.4	135	348.189
																10	146	128	97	144	134	102	125	89	101	3	82	1.8	327	10	148		136	118	87	134	124	92	115	79	91	79		325.2	138	355.927
																12	146	110	105	121	105	110	115	106	112	5	112	3	366	6	129		134	98	93	109	93	98	103	94	100	107		363	123	317.239
																8	149	108	102	120	113	104	120	109	84	7	67	4.2	355	5	113		141	100	94	112	105	96	112	101	76	60		350.8	108	278.551
																12	134	112	79	123	131	117	139	103	84	4	72	2.4	345	8	116		122	100	67	111	119	105	127	91	72	68		342.6	108	278.551
																5	120	129	90	128	123	100	106	126	98	7	80	4.2	360	4	112		115	124	85	123	118	95	101	121	93	73		355.8	108	278.551
																6	138	114	107	124	115	143	116	106	98	2	84	1.2	341	6	160		132	108	101	118	109	137	110	100	92	82		339.8	154	397.193
																6	128	121	108	138	118	101	121	107	109	6	72	3.6	338	3	143		122	115	102	132	112	95	115	101	103	66		334.4	140	361.085
																5	119	110	87	137	102	94	114	101	86	4	87	2.4	348	7	130		114	105	82	132	97	89	109	96	81	83		345.6	123	317.239
																5	127	117	94	129	140	90	128	101	104	6	73	3.6	370	9	146		122	112	89	124	135	85	123	96	99	67		366.4	137	353.347
																4	139	119	91	138	113	103	111	107	85	5	82	3	395	4	127		135	115	87	134	109	99	107	103	81	77		392	123	317.239
																5	134	114	91	134	132	90	117	106	94	4	80	2.4	345	8	146		129	109	86	129	127	85	112	101	89	76		342.6	138	355.927
																6	115	109	110	109	116	101	112	129	87	5	71	3	334	7	136		109	103	104	103	110	95	106	123	81	66		331	129	332.714
																8	125	126	107	109	117	102	107	130	112	5	92	3	341	3	127		117	118	99	101	109	94	99	122	104	87		338	124	319.818
																8	115	109	107	132	118	81	120	108	94	11	74	6.6	351	8	134		107	101	99	124	110	73	112	100	86	63		344.4	126	324.976
																5	137	118	111	128	124	89	134	102	101	3	68	1.8	331	4	138		132	113	106	123	119	84	129	97	96	65		329.2	134	345.61
																10	118	113	104	135	131	107	106	95	84	5	79	3	356	10	134		108	103	94	125	121	97	96	85	74	74		353	124	319.818
																2	115	117	109	120	133	94	129	116	106	7	86	4.2	349	7	100		113	115	107	118	131	92	127	114	104	79		344.8	93	239.864
																8	126	123	100	131	122	84	123	103	79	2	80	1.2	340	10	123		118	115	92	123	114	76	115	95	71	78		338.8	113	291.447
																10	121	106	94	114	119	82	138	107	92	5	85	3	337	6	133		111	96	84	104	109	72	128	97	82	80		334	127	327.556
																3	120	106	86	114	110	107	125	115	93	11	90	6.6	354	7	152		117	103	83	111	107	104	122	112	90	79		347.4	145	373.981
																4	133	100	96	130	112	120	129	118	94	4	91	2.4	320	4	121		129	96	92	126	108	116	125	114	90	87		317.6	117	301.764
																3	121	103	88	126	119	102	104	105	90	4	85	2.4	373	5	130		118	100	85	123	116	99	101	102	87	81		370.6	125	322.397
																2	134	109	99	123	101	107	94	94	79	6	80	3.6	351	4	126		132	107	97	121	99	105	92	92	77	74		347.4	122	314.66
																6	119	106	100	115	114	104	112	95	97	4	89	2.4	323	9	147		113	100	94	109	108	98	106	89	91	85		320.6	138	355.927
																5	113	112	91	132	119	87	126	94	108	1	81	0.6	351	4	122		108	107	86	127	114	82	121	89	103	80		350.4	118	304.343
																4	116	113	104	125	118	85	102	104	80	7	74	4.2	303	7	123		112	109	100	121	114	81	98	100	76	67		298.8	116	299.185
																3	107	104	87	122	104	88	95	100	98	10	98	6	337	6	116		104	101	84	119	101	85	92	97	95	88		331	110	283.71
																6	120	105	90	128	114	112	124	95	92	5	101	3	325	6	116		114	99	84	122	108	106	118	89	86	96		322	110	283.71
																7	135	124	83	119	102	91	97	86	98	8	80	4.8	356	4	121		128	117	76	112	95	84	90	79	91	72		351.2	117	301.764
																4	122	113	114	114	95	103	117	116	101	11	87	6.6	318	12	126		118	109	110	110	91	99	113	112	97	76		311.4	114	294.026
																2	122	91	93	124	124	105	125	91	86	5	84	3	344	2	113		120	89	91	122	122	103	123	89	84	79		341	111	286.289
																3	119	118	99	118	123	95	131	111	95	9	93	5.4	355	8	128		116	115	96	115	120	92	128	108	92	84		349.6	120	309.501
																7	134	114	82	140	117	108	119	90	86	6	82	3.6	310	1	132		127	107	75	133	110	101	112	83	79	76		306.4	131	337.872
																5	128	96	73	98	110	94	102	93	90	9	87	5.4	334	5	121		123	91	68	93	105	89	97	88	85	78		328.6	116	299.185
																5	108	90	105	107	93	102	97	82	96	4	79	2.4	325	6	146		103	85	100	102	88	97	92	77	91	75		322.6	140	361.085
																5	128	116	110	98	110	105	129	97	87	5	97	3	323	3	112		123	111	105	93	105	100	124	92	82	92		320	109	281.13
																3	104	130	103	120	105	78	103	95	91	7	106	4.2	334	6	126		101	127	100	117	102	75	100	92	88	99		329.8	120	309.501
																10	100	87	105	107	102	92	105	112	90	4	84	2.4	319	6	129		90	77	95	97	92	82	95	102	80	80		316.6	123	317.239
																4	131	103	82	116	126	108	118	90	99	9	82	5.4	322	3	120		127	99	78	112	122	104	114	86	95	73		316.6	117	301.764
																14	129	104	104	103	106	85	115	93	77	5	91	3	346	6	120		115	90	90	89	92	71	101	79	63	86		343	114	294.026
																9	125	113	98	124	85	87	99	83	79	2	74	1.2	338	4	129		116	104	89	115	76	78	90	74	70	72		336.8	125	322.397
																8	113	107	100	97	109	89	95	96	83	5	86	3	352	7	128		105	99	92	89	101	81	87	88	75	81		349	121	312.081
																3	140	90	84	132	112	93	99	105	98	5	65	3	370	9	126		137	87	81	129	109	90	96	102	95	60		367	117	301.764
																4	103	105	75	125	100	106	80	116	92	5	81	3	342	6	133		99	101	71	121	96	102	76	112	88	76		339	127	327.556
																4	115	107	100	127	115	86	109	114	93	5	84	3	308	3	151		111	103	96	123	111	82	105	110	89	79		305	148	381.718
																9	128	88	104	103	112	82	107	99	80	5	66	3	344	4	122		119	79	95	94	103	73	98	90	71	61		341	118	304.343
																6	104	112	83	103	107	79	120	87	83	5	78	3	327	3	103		98	106	77	97	101	73	114	81	77	73		324	100	257.918
																2	126	108	86	122	97	103	94	89	89	7	73	4.2	321	10	149		124	106	84	120	95	101	92	87	87	66		316.8	139	358.506
																6	108	105	89	115	100	76	103	90	98	4	88	2.4	368	9	122		102	99	83	109	94	70	97	84	92	84		365.6	113	291.447
																6	96	110	81	126	82	69	110	102	104	7	83	4.2	347	11	139		90	104	75	120	76	63	104	96	98	76		342.8	128	330.135
																4	108	101	102	108	87	77	101	99	98	5	87	3	356	6	129		104	97	98	104	83	73	97	95	94	82		353	123	317.239
																6	120	99	82	105	88	91	118	106	80	5	83	3	326	7	121		114	93	76	99	82	85	112	100	74	78		323	114	294.026
																3	126	108	88	121	101	73	115	90	93	9	84	5.4	343	5	122		123	105	85	118	98	70	112	87	90	75		337.6	117	301.764
																7	125	107	94	119	93	93	117	84	84	5	74	3	334	5	111		118	100	87	112	86	86	110	77	77	69		331	106	273.393
																6	116	111	80	118	90	70	111	89	92	11	107	6.6	325	4	131		110	105	74	112	84	64	105	83	86	96		318.4	127	327.556
																8	116	94	90	108	106	90	114	98	63	8	86	4.8	318	7	123		108	86	82	100	98	82	106	90	55	78		313.2	116	299.185
																7	116	90	97	113	98	84	88	90	79	9	97	5.4	342	7	130		109	83	90	106	91	77	81	83	72	88		336.6	123	317.239
																4	131	79	98	116	106	93	104	104	86	5	98	3	338	8	133		127	75	94	112	102	89	100	100	82	93		335	125	322.397
																5	106	105	71	102	105	98	104	88	88	5	74	3	340	5	108		101	100	66	97	100	93	99	83	83	69		337	103	265.655
																7	116	94	85	107	90	94	125	97	80	9	78	5.4	347	8	117		109	87	78	100	83	87	118	90	73	69		341.6	109	281.13
																4	116	91	99	90	104	82	103	88	99	8	72	4.8	285	7	143		112	87	95	86	100	78	99	84	95	64		280.2	136	350.768
																4	107	106	93	108	100	76	104	93	81	6	76	3.6	290	6	140		103	102	89	104	96	72	100	89	77	70		286.4	134	345.61
																6	88	100	87	110	106	105	89	94	94	2	96	1.2	315	7	104		82	94	81	104	100	99	83	88	88	94		313.8	97	250.18
																2	106	94	94	110	83	86	84	83	95	6	77	3.6	311	6	146		104	92	92	108	81	84	82	81	93	71		307.4	140	361.085
																4	114	83	82	98	99	90	96	105	74	4	76	2.4	290	6	143		110	79	78	94	95	86	92	101	70	72		287.6	137	353.347
																9	120	105	85	83	95	86	112	87	81	5	64	3	326	6	131		111	96	76	74	86	77	103	78	72	59		323	125	322.397
																13	104	92	94	101	108	88	126	81	88	6	83	3.6	308	9	114		91	79	81	88	95	75	113	68	75	77		304.4	105	270.814
																9	92	82	109	108	84	73	99	82	67	4	84	2.4	317	3	116		83	73	100	99	75	64	90	73	58	80		314.6	113	291.447
																7	103	87	79	112	90	75	87	88	99	3	89	1.8	308	7	129		96	80	72	105	83	68	80	81	92	86		306.2	122	314.66
																3	109	103	76	117	94	103	105	96	95	5	87	3	332	6	117		106	100	73	114	91	100	102	93	92	82		329	111	286.289
																5	96	97	65	91	105	92	97	94	80	7	85	4.2	297	7	122		91	92	60	86	100	87	92	89	75	78		292.8	115	296.606
																6	110	90	89	109	98	85	99	70	91	3	78	1.8	295	5	109		104	84	83	103	92	79	93	64	85	75		293.2	104	268.235
																7	100	85	90	103	87	99	94	89	76	2	90	1.2	316	6	115		93	78	83	96	80	92	87	82	69	88		314.8	109	281.13
																9	92	107	93	102	88	79	95	102	70	7	64	4.2	320	6	116		83	98	84	93	79	70	86	93	61	57		315.8	110	283.71
																6	102	81	70	87	93	79	79	85	91	4	75	2.4	289	3	116		96	75	64	81	87	73	73	79	85	71		286.6	113	291.447
																2	109	78	84	95	102	99	94	96	83	6	68	3.6	303	7	136		107	76	82	93	100	97	92	94	81	62		299.4	129	332.714
																7	85	87	77	86	91	94	94	74	79	10	84	6	342	5	100		78	80	70	79	84	87	87	67	72	74		336	95	245.022
																5	108	103	97	105	89	87	83	99	72	4	88	2.4	311	7	121		103	98	92	100	84	82	78	94	67	84		308.6	114	294.026
																8	106	99	86	98	101	89	81	82	82	7	91	4.2	312	9	119		98	91	78	90	93	81	73	74	74	84		307.8	110	283.71
																8	112	94	97	110	72	81	82	90	71	5	77	3	284	2	108		104	86	89	102	64	73	74	82	63	72		281	106	273.393
																4	115	103	81	104	84	77	104	97	88	4	75	2.4	354	3	106		111	99	77	100	80	73	100	93	84	71		351.6	103	265.655
																4	108	97	89	87	74	85	79	81	68	3	93	1.8	324	7	113		104	93	85	83	70	81	75	77	64	90		322.2	106	273.393
																11	91	89	82	98	102	73	105	80	56	7	69	4.2	319	6	113		80	78	71	87	91	62	94	69	45	62		314.8	107	275.972
																2	95	95	77	101	64	76	90	88	78	6	87	3.6	303	8	108		93	93	75	99	62	74	88	86	76	81		299.4	100	257.918
																3	93	93	86	83	74	69	105	69	85	5	85	3	315	7	124		90	90	83	80	71	66	102	66	82	80		312	117	301.764
																9	92	72	78	103	73	62	90	81	69	6	92	3.6	333	7	127		83	63	69	94	64	53	81	72	60	86		329.4	120	309.501
																6	119	75	79	107	79	74	94	82	87	4	81	2.4	319	6	132		113	69	73	101	73	68	88	76	81	77		316.6	126	324.976
																10	117	90	76	102	86	68	94	73	82	3	88	1.8	345	6	112		107	80	66	92	76	58	84	63	72	85		343.2	106	273.393
																4	83	83	70	79	94	90	85	79	68	7	85	4.2	333	2	146		79	79	66	75	90	86	81	75	64	78		328.8	144	371.402
																8	95	74	66	95	90	90	91	74	69	8	89	4.8	306	2	116		87	66	58	87	82	82	83	66	61	81		301.2	114	294.026
																5	91	89	71	104	83	82	97	107	72	5	71	3	296	8	124		86	84	66	99	78	77	92	102	67	66		293	116	299.185
																3	85	86	77	99	72	73	99	71	63	5	84	3	320	9	120		82	83	74	96	69	70	96	68	60	79		317	111	286.289
																10	89	83	80	113	88	74	88	90	84	9	75	5.4	336	7	133		79	73	70	103	78	64	78	80	74	66		330.6	126	324.976
																3	111	83	91	104	83	74	85	80	70	7	78	4.2	298	4	114		108	80	88	101	80	71	82	77	67	71		293.8	110	283.71
																7	104	94	78	82	96	79	89	79	77	4	91	2.4	308	7	121		97	87	71	75	89	72	82	72	70	87		305.6	114	294.026
																3	83	81	78	85	84	80	107	85	72	3	92	1.8	309	6	135		80	78	75	82	81	77	104	82	69	89		307.2	129	332.714
																2	105	83	76	89	69	68	87	68	78	8	91	4.8	341	8	128		103	81	74	87	67	66	85	66	76	83		336.2	120	309.501
																2	107	94	87	83	96	80	75	71	70	7	83	4.2	316	7	144		105	92	85	81	94	78	73	69	68	76		311.8	137	353.347
																8	115	95	76	97	90	77	86	96	73	6	86	3.6	335	6	109		107	87	68	89	82	69	78	88	65	80		331.4	103	265.655
																4	76	77	75	90	89	75	96	77	70	1	88	0.6	319	7	142		72	73	71	86	85	71	92	73	66	87		318.4	135	348.189
																5	86	81	72	81	103	82	98	88	57	8	88	4.8	338	8	165		81	76	67	76	98	77	93	83	52	80		333.2	157	404.931
																5	85	81	72	100	90	78	80	94	78	5	85	3	355	2	198		80	76	67	95	85	73	75	89	73	80		352	196	505.519
																7	110	92	85	98	90	63	83	77	70	5	76	3	377	8	215		103	85	78	91	83	56	76	70	63	71		374	207	533.89
																5	105	74	82	78	88	81	83	81	63	6	77	3.6	394	10	214		100	69	77	73	83	76	78	76	58	71		390.4	204	526.152
																8	93	81	77	89	80	76	86	82	75	8	77	4.8	382	2	217		85	73	69	81	72	68	78	74	67	69		377.2	215	554.523
																8	103	82	72	93	76	55	90	72	75	5	83	3	337	5	181		95	74	64	85	68	47	82	64	67	78		334	176	453.935
																5	95	81	81	83	88	63	83	89	64	3	63	1.8	328	10	154		90	76	76	78	83	58	78	84	59	60		326.2	144	371.402
																6	110	81	84	99	72	94	93	84	58	8	77	4.8	328	3	121		104	75	78	93	66	88	87	78	52	69		323.2	118	304.343
																1	92	77	62	83	86	74	71	71	60	4	88	2.4	303	2	128		91	76	61	82	85	73	70	70	59	84		300.6	126	324.976
																4	72	75	84	82	99	77	89	72	62	7	85	4.2	310	3	115		68	71	80	78	95	73	85	68	58	78		305.8	112	288.868
																4	89	89	60	94	80	71	94	68	64	4	92	2.4	320	7	129		85	85	56	90	76	67	90	64	60	88		317.6	122	314.66
																6	90	89	83	79	70	57	83	83	56	4	78	2.4	322	4	100		84	83	77	73	64	51	77	77	50	74		319.6	96	247.601
																7	84	71	70	95	72	66	79	64	68	8	78	4.8	299	9	116		77	64	63	88	65	59	72	57	61	70		294.2	107	275.972
																6	85	83	74	91	70	63	89	71	68	8	79	4.8	290	4	101		79	77	68	85	64	57	83	65	62	71		285.2	97	250.18
																3	88	67	82	77	82	75	90	71	69	2	86	1.2	299	5	99		85	64	79	74	79	72	87	68	66	84		297.8	94	242.443
																7	101	63	74	74	77	77	94	79	65	3	72	1.8	311	8	136		94	56	67	67	70	70	87	72	58	69		309.2	128	330.135
																8	83	70	79	81	90	74	85	86	55	4	91	2.4	320	5	133		75	62	71	73	82	66	77	78	47	87		317.6	128	330.135
																5	92	74	73	85	81	85	87	80	68	2	88	1.2	308	4	89		87	69	68	80	76	80	82	75	63	86		306.8	85	219.23
																3	85	66	79	72	82	76	71	74	76	2	93	1.2	268	5	119		82	63	76	69	79	73	68	71	73	91		266.8	114	294.026
																9	107	91	80	83	76	68	84	69	68	3	75	1.8	271	5	116		98	82	71	74	67	59	75	60	59	72		269.2	111	286.289
																2	85	71	72	86	78	69	61	66	52	2	77	1.2	316	5	127		83	69	70	84	76	67	59	64	50	75		314.8	122	314.66
																11	97	71	67	99	91	74	78	67	49	5	83	3	262	6	128		86	60	56	88	80	63	67	56	38	78		259	122	314.66
																4	71	66	88	99	81	64	78	69	73	3	92	1.8	313	7	112		67	62	84	95	77	60	74	65	69	89		311.2	105	270.814
																4	90	96	68	90	75	78	80	66	57	3	90	1.8	305	6	105		86	92	64	86	71	74	76	62	53	87		303.2	99	255.339
																4	83	90	62	71	66	77	81	70	48	3	98	1.8	313	3	114		79	86	58	67	62	73	77	66	44	95		311.2	111	286.289
																3	84	67	75	83	85	63	82	59	68	3	90	1.8	263	5	118		81	64	72	80	82	60	79	56	65	87		261.2	113	291.447
																5	84	74	74	80	73	54	78	66	68	4	65	2.4	321	7	117		79	69	69	75	68	49	73	61	63	61		318.6	110	283.71
																4	100	98	64	81	70	74	66	55	78	6	75	3.6	281	4	115		96	94	60	77	66	70	62	51	74	69		277.4	111	286.289
																3	84	62	56	61	67	65	88	71	68	6	74	3.6	309	3	125		81	59	53	58	64	62	85	68	65	68		305.4	122	314.66
																9	86	76	76	77	89	70	80	67	72	6	77	3.6	290	7	117		77	67	67	68	80	61	71	58	63	71		286.4	110	283.71
																9	89	82	62	65	87	60	65	67	61	4	78	2.4	296	12	126		80	73	53	56	78	51	56	58	52	74		293.6	114	294.026
																8	81	85	67	83	70	67	70	64	63	4	103	2.4	307	4	130		73	77	59	75	62	59	62	56	55	99		304.6	126	324.976
																9	83	59	74	83	70	68	90	84	72	6	86	3.6	329	13	117		74	50	65	74	61	59	81	75	63	80		325.4	104	268.235
																5	69	92	69	85	80	60	76	72	66	6	96	3.6	285	16	98		64	87	64	80	75	55	71	67	61	90		281.4	82	211.493
																5	72	84	63	91	80	66	65	72	54	9	86	5.4	285	4	122		67	79	58	86	75	61	60	67	49	77		279.6	118	304.343
																7	80	67	84	85	67	68	92	58	79	6	97	3.6	301	8	94		73	60	77	78	60	61	85	51	72	91		297.4	86	221.809
																8	78	62	63	83	77	75	85	82	81	4	78	2.4	292	3	113		70	54	55	75	69	67	77	74	73	74		289.6	110	283.71
																5	83	69	60	87	72	57	65	74	61	5	95	3	270	5	109		78	64	55	82	67	52	60	69	56	90		267	104	268.235
																6	86	79	71	76	71	51	64	65	56	3	77	1.8	281	4	130		80	73	65	70	65	45	58	59	50	74		279.2	126	324.976
																4	81	67	72	78	85	65	75	70	59	9	79	5.4	307	3	123		77	63	68	74	81	61	71	66	55	70		301.6	120	309.501
																7	99	76	56	75	66	80	71	65	63	5	71	3	299	5	114		92	69	49	68	59	73	64	58	56	66		296	109	281.13
																8	91	70	70	57	69	62	72	65	64	7	91	4.2	309	2	110		83	62	62	49	61	54	64	57	56	84		304.8	108	278.551
																3	90	71	71	98	84	48	72	78	56	4	96	2.4	289	5	107		87	68	68	95	81	45	69	75	53	92		286.6	102	263.076
																13	99	82	62	89	76	63	82	75	70	4	79	2.4	311	3	105		86	69	49	76	63	50	69	62	57	75		308.6	102	263.076
																4	77	80	51	78	88	67	85	66	49	3	79	1.8	290	6	105		73	76	47	74	84	63	81	62	45	76		288.2	99	255.339
																5	74	78	50	84	73	64	98	70	45	11	89	6.6	289	6	100		69	73	45	79	68	59	93	65	40	78		282.4	94	242.443
																7	91	62	59	73	75	68	73	67	61	4	80	2.4	302	8	93		84	55	52	66	68	61	66	60	54	76		299.6	85	219.23
																5	75	84	61	74	70	69	61	75	64	7	93	4.2	286	5	112		70	79	56	69	65	64	56	70	59	86		281.8	107	275.972
																5	78	49	70	82	70	65	87	69	66	4	85	2.4	297	6	112		73	44	65	77	65	60	82	64	61	81		294.6	106	273.393
																5	72	73	55	88	65	51	75	67	59	10	73	6	288	10	121		67	68	50	83	60	46	70	62	54	63		282	111	286.289
																10	71	58	64	86	63	60	65	65	58	4	80	2.4	280	4	99		61	48	54	76	53	50	55	55	48	76		277.6	95	245.022
																7	70	80	73	82	68	61	89	77	52	5	84	3	290	8	139		63	73	66	75	61	54	82	70	45	79		287	131	337.872
																5	86	78	53	82	74	60	68	58	49	3	73	1.8	300	10	116		81	73	48	77	69	55	63	53	44	70		298.2	106	273.393
																3	85	80	54	75	67	69	78	63	62	6	89	3.6	284	4	115		82	77	51	72	64	66	75	60	59	83		280.4	111	286.289
																5	71	67	58	78	78	50	83	61	56	4	69	2.4	259	2	95		66	62	53	73	73	45	78	56	51	65		256.6	93	239.864
																3	76	61	50	74	70	60	66	72	69	1	77	0.6	272	9	106		73	58	47	71	67	57	63	69	66	76		271.4	97	250.18
																5	72	82	59	81	69	68	79	65	59	6	96	3.6	248	5	105		67	77	54	76	64	63	74	60	54	90		244.4	100	257.918
																5	87	77	77	81	65	57	74	78	52	9	62	5.4	300	8	121		82	72	72	76	60	52	69	73	47	53		294.6	113	291.447
																6	75	84	64	75	66	49	74	80	60	4	73	2.4	282	11	118		69	78	58	69	60	43	68	74	54	69		279.6	107	275.972
																7	107	55	73	75	58	67	67	70	71	7	76	4.2	305	4	75		100	48	66	68	51	60	60	63	64	69		300.8	71	183.122
																5	68	64	71	66	69	63	80	68	70	8	72	4.8	263	3	88		63	59	66	61	64	58	75	63	65	64		258.2	85	219.23
																3	73	69	45	72	55	52	68	55	58	5	81	3	290	8	91		70	66	42	69	52	49	65	52	55	76		287	83	214.072
																3	82	76	76	74	72	52	74	65	67	5	92	3	304	10	105		79	73	73	71	69	49	71	62	64	87		301	95	245.022
																5	81	61	64	76	70	65	83	63	71	3	97	1.8	275	6	129		76	56	59	71	65	60	78	58	66	94		273.2	123	317.239
																4	69	67	67	67	74	56	68	49	58	4	93	2.4	298	5	108		65	63	63	63	70	52	64	45	54	89		295.6	103	265.655
																6	67	75	59	61	70	53	68	71	58	9	95	5.4	287	8	123		61	69	53	55	64	47	62	65	52	86		281.6	115	296.606
																6	99	68	65	63	73	66	70	63	63	8	74	4.8	299	3	124		93	62	59	57	67	60	64	57	57	66		294.2	121	312.081
																4	62	67	49	68	73	52	88	49	59	5	88	3	269	6	122		58	63	45	64	69	48	84	45	55	83		266	116	299.185
																7	77	68	64	62	66	61	74	59	64	11	77	6.6	276	2	111		70	61	57	55	59	54	67	52	57	66		269.4	109	281.13
																3	61	52	73	73	61	54	55	65	57	5	91	3	286	8	109		58	49	70	70	58	51	52	62	54	86		283	101	260.497
																5	90	75	63	58	60	54	70	63	62	4	74	2.4	266	5	102		85	70	58	53	55	49	65	58	57	70		263.6	97	250.18
																8	89	63	59	70	70	57	75	59	68	4	101	2.4	292	10	112		81	55	51	62	62	49	67	51	60	97		289.6	102	263.076
																5	77	70	59	73	68	73	73	60	56	3	73	1.8	286	5	104		72	65	54	68	63	68	68	55	51	70		284.2	99	255.339
																5	66	50	69	67	69	58	69	67	49	3	73	1.8	288	5	100		61	45	64	62	64	53	64	62	44	70		286.2	95	245.022
																6	73	59	53	76	72	44	50	54	48	6	79	3.6	291	7	105		67	53	47	70	66	38	44	48	42	73		287.4	98	252.759
																7	62	68	59	66	78	55	68	51	67	8	74	4.8	315	5	110		55	61	52	59	71	48	61	44	60	66		310.2	105	270.814
																4	104	69	66	81	58	60	67	62	52	10	76	6	263	5	115		100	65	62	77	54	56	63	58	48	66		257	110	283.71
																7	79	54	55	74	87	58	72	83	50	15	91	9	282	4	115		72	47	48	67	80	51	65	76	43	76		273	111	286.289
																7	86	69	73	60	66	57	72	45	55	9	82	5.4	288	8	93		79	62	66	53	59	50	65	38	48	73		282.6	85	219.23
																5	81	68	64	77	72	47	80	65	63	10	97	6	277	8	107		76	63	59	72	67	42	75	60	58	87		271	99	255.339
																5	77	71	57	69	55	61	66	63	61	4	103	2.4	245	5	96		72	66	52	64	50	56	61	58	56	99		242.6	91	234.705
																3	68	66	57	82	56	61	59	71	61	7	93	4.2	263	5	114		65	63	54	79	53	58	56	68	58	86		258.8	109	281.13
																4	68	54	48	69	53	47	61	64	55	5	85	3	322	6	107		64	50	44	65	49	43	57	60	51	80		319	101	260.497
																7	75	68	63	82	52	65	63	58	63	8	99	4.8	299	8	106		68	61	56	75	45	58	56	51	56	91		294.2	98	252.759
																2	64	52	71	60	77	45	61	71	56	7	95	4.2	284	1	125		62	50	69	58	75	43	59	69	54	88		279.8	124	319.818
																5	71	69	40	76	55	53	66	57	46	7	78	4.2	293	10	122		66	64	35	71	50	48	61	52	41	71		288.8	112	288.868
																4	68	66	61	54	61	59	58	70	52	5	87	3	309	0	98		64	62	57	50	57	55	54	66	48	82		306	98	252.759
																1	69	64	54	70	68	61	61	65	55	10	79	6	279	7	108		68	63	53	69	67	60	60	64	54	69		273	101	260.497
																6	80	54	51	50	56	38	68	74	50	4	82	2.4	257	3	113		74	48	45	44	50	32	62	68	44	78		254.6	110	283.71
																7	60	51	59	72	63	67	55	66	70	7	81	4.2	277	4	115		53	44	52	65	56	60	48	59	63	74		272.8	111	286.289
																7	63	47	60	67	57	60	64	56	45	5	71	3	284	3	100		56	40	53	60	50	53	57	49	38	66		281	97	250.18
																5	82	52	59	70	69	47	60	57	49	5	81	3	302	3	106		77	47	54	65	64	42	55	52	44	76		299	103	265.655
																2	66	56	54	66	65	59	52	66	54	4	78	2.4	296	1	121		64	54	52	64	63	57	50	64	52	74		293.6	120	309.501
																6	79	54	50	74	65	38	67	52	42	5	77	3	299	6	118		73	48	44	68	59	32	61	46	36	72		296	112	288.868
																6	80	60	45	57	49	49	57	51	57	8	96	4.8	275	5	113		74	54	39	51	43	43	51	45	51	88		270.2	108	278.551
																3	72	58	66	62	63	54	57	45	53	4	75	2.4	280	4	108		69	55	63	59	60	51	54	42	50	71		277.6	104	268.235
																3	81	60	57	74	65	57	72	79	53	4	78	2.4	277	4	132		78	57	54	71	62	54	69	76	50	74		274.6	128	330.135
																8	81	65	60	66	60	57	76	54	56	6	73	3.6	279	4	111		73	57	52	58	52	49	68	46	48	67		275.4	107	275.972
																4	58	52	53	70	60	43	63	70	40	2	68	1.2	269	4	107		54	48	49	66	56	39	59	66	36	66		267.8	103	265.655
																7	55	56	58	74	68	44	69	60	51	4	72	2.4	292	8	124		48	49	51	67	61	37	62	53	44	68		289.6	116	299.185
																3	79	67	63	59	63	48	71	52	50	7	97	4.2	284	6	111		76	64	60	56	60	45	68	49	47	90		279.8	105	270.814
																3	56	65	68	54	53	54	64	63	61	6	66	3.6	287	6	96		53	62	65	51	50	51	61	60	58	60		283.4	90	232.126
																2	67	60	57	75	63	51	67	46	58	8	88	4.8	266	4	112		65	58	55	73	61	49	65	44	56	80		261.2	108	278.551
																5	70	76	49	67	78	56	56	47	50	2	89	1.2	283	4	102		65	71	44	62	73	51	51	42	45	87		281.8	98	252.759
																10	62	51	58	68	74	50	80	70	56	10	100	6	269	8	117		52	41	48	58	64	40	70	60	46	90		263	109	281.13
																3	65	59	49	64	54	48	63	53	46	6	71	3.6	304	9	108		62	56	46	61	51	45	60	50	43	65		300.4	99	255.339
																6	63	55	39	61	65	55	74	46	55	3	80	1.8	301	6	104		57	49	33	55	59	49	68	40	49	77		299.2	98	252.759
																5	66	70	53	55	56	55	63	48	47	9	74	5.4	272	6	85		61	65	48	50	51	50	58	43	42	65		266.6	79	203.755
																3	61	68	47	63	73	50	54	65	55	7	75	4.2	260	5	112		58	65	44	60	70	47	51	62	52	68		255.8	107	275.972
																2	69	59	47	70	70	53	54	60	40	9	80	5.4	292	6	106		67	57	45	68	68	51	52	58	38	71		286.6	100	257.918
																5	55	40	59	67	69	56	71	62	40	4	89	2.4	268	2	99		50	35	54	62	64	51	66	57	35	85		265.6	97	250.18
																8	82	56	57	57	56	36	59	60	43	6	90	3.6	277	7	100		74	48	49	49	48	28	51	52	35	84		273.4	93	239.864
																7	71	41	51	71	61	70	68	52	65	4	85	2.4	276	3	110		64	34	44	64	54	63	61	45	58	81		273.6	107	275.972
																2	74	43	50	66	46	49	57	65	51	4	80	2.4	256	6	110		72	41	48	64	44	47	55	63	49	76		253.6	104	268.235
																6	62	62	44	64	59	57	68	56	45	6	88	3.6	282	6	104		56	56	38	58	53	51	62	50	39	82		278.4	98	252.759
																5	63	53	43	57	62	44	63	42	52	5	97	3	285	4	92		58	48	38	52	57	39	58	37	47	92		282	88	226.968
																7	61	64	41	65	47	47	47	54	46	2	79	1.2	292	9	105		54	57	34	58	40	40	40	47	39	77		290.8	96	247.601
																6	53	46	46	62	69	53	56	44	44	5	77	3	271	8	108		47	40	40	56	63	47	50	38	38	72		268	100	257.918
																6	66	54	56	79	49	57	52	59	58	7	78	4.2	279	4	101		60	48	50	73	43	51	46	53	52	71		274.8	97	250.18
																4	64	62	42	55	65	46	56	66	47	6	70	3.6	252	3	109		60	58	38	51	61	42	52	62	43	64		248.4	106	273.393
																4	61	61	54	58	75	55	56	69	53	4	64	2.4	252	5	117		57	57	50	54	71	51	52	65	49	60		249.6	112	288.868
																4	60	38	45	62	62	56	56	62	41	7	82	4.2	247	7	112		56	34	41	58	58	52	52	58	37	75		242.8	105	270.814
																2	51	53	50	57	58	49	54	47	49	2	87	1.2	270	3	98		49	51	48	55	56	47	52	45	47	85		268.8	95	245.022
																6	64	68	57	46	46	51	68	59	50	4	75	2.4	263	2	106		58	62	51	40	40	45	62	53	44	71		260.6	104	268.235
																5	55	60	38	71	60	44	69	53	38	5	80	3	283	4	115		50	55	33	66	55	39	64	48	33	75		280	111	286.289
																7	57	53	64	64	65	36	70	53	52	6	80	3.6	254	2	96		50	46	57	57	58	29	63	46	45	74		250.4	94	242.443
																3	66	53	50	60	56	47	70	38	46	7	74	4.2	279	8	111		63	50	47	57	53	44	67	35	43	67		274.8	103	265.655
																4	68	50	50	58	41	55	73	41	43	3	72	1.8	277	5	96		64	46	46	54	37	51	69	37	39	69		275.2	91	234.705
																9	68	47	52	66	56	51	48	42	53	2	79	1.2	267	4	101		59	38	43	57	47	42	39	33	44	77		265.8	97	250.18
																6	54	54	44	73	59	57	76	57	40	5	77	3	300	8	110		48	48	38	67	53	51	70	51	34	72		297	102	263.076
																6	50	72	43	67	61	40	55	57	46	7	88	4.2	255	4	106		44	66	37	61	55	34	49	51	40	81		250.8	102	263.076
																11	69	60	51	52	63	60	66	47	55	4	83	2.4	287	4	103		58	49	40	41	52	49	55	36	44	79		284.6	99	255.339
																4	61	38	47	55	67	61	65	45	40	3	66	1.8	253	13	103		57	34	43	51	63	57	61	41	36	63		251.2	90	232.126
																10	60	60	45	67	68	54	58	39	50	5	78	3	269	7	104		50	50	35	57	58	44	48	29	40	73		266	97	250.18
																5	71	70	52	62	64	47	55	49	52	5	74	3	280	4	115		66	65	47	57	59	42	50	44	47	69		277	111	286.289
																3	65	54	54	53	65	50	47	54	47	5	67	3	303	7	110		62	51	51	50	62	47	44	51	44	62		300	103	265.655
																6	54	60	61	69	65	46	55	52	51	6	69	3.6	289	4	112		48	54	55	63	59	40	49	46	45	63		285.4	108	278.551
																5	56	66	44	57	60	48	50	49	41	6	63	3.6	292	10	119		51	61	39	52	55	43	45	44	36	57		288.4	109	281.13
																6	60	65	46	49	59	59	56	58	35	6	86	3.6	269	3	113		54	59	40	43	53	53	50	52	29	80		265.4	110	283.71
																4	61	57	46	63	52	45	51	55	53	9	77	5.4	270	3	102		57	53	42	59	48	41	47	51	49	68		264.6	99	255.339
																6	69	51	57	53	52	33	57	52	55	6	57	3.6	277	2	108		63	45	51	47	46	27	51	46	49	51		273.4	106	273.393
																3	79	59	58	66	61	43	68	46	40	3	69	1.8	261	5	100		76	56	55	63	58	40	65	43	37	66		259.2	95	245.022
																2	54	46	60	63	61	43	59	56	48	3	74	1.8	274	7	105		52	44	58	61	59	41	57	54	46	71		272.2	98	252.759
																0	73	63	49	66	52	47	55	50	53	5	69	3	274	5	110		73	63	49	66	52	47	55	50	53	64		271	105	270.814
																7	53	49	52	64	70	41	47	49	44	2	74	1.2	280	8	108		46	42	45	57	63	34	40	42	37	72		278.8	100	257.918
																5	78	54	49	53	59	41	54	65	46	6	70	3.6	270	6	106		73	49	44	48	54	36	49	60	41	64		266.4	100	257.918
																6	60	47	50	62	63	33	52	57	41	3	82	1.8	270	5	85		54	41	44	56	57	27	46	51	35	79		268.2	80	206.334
																5	63	56	40	56	53	46	61	51	52	3	66	1.8	269	7	107		58	51	35	51	48	41	56	46	47	63		267.2	100	257.918
																7	59	46	42	64	51	51	47	57	51	3	60	1.8	276	3	96		52	39	35	57	44	44	40	50	44	57		274.2	93	239.864
																5	50	52	58	64	55	48	56	38	49	5	60	3	287	7	101		45	47	53	59	50	43	51	33	44	55		284	94	242.443
																3	65	59	51	57	62	33	52	37	45	2	68	1.2	294	7	113		62	56	48	54	59	30	49	34	42	66		292.8	106	273.393
																2	55	57	52	56	46	46	57	52	46	7	46	4.2	265	6	115		53	55	50	54	44	44	55	50	44	39		260.8	109	281.13
																4	58	56	52	56	48	39	58	57	32	2	60	1.2	271	7	101		54	52	48	52	44	35	54	53	28	58		269.8	94	242.443
																0	53	63	54	45	62	43	51	53	53	7	66	4.2	236	2	95		53	63	54	45	62	43	51	53	53	59		231.8	93	239.864
																6	63	51	65	55	56	46	66	59	34	3	53	1.8	256	6	111		57	45	59	49	50	40	60	53	28	50		254.2	105	270.814
																5	64	60	55	58	49	67	62	59	46	9	56	5.4	251	8	91		59	55	50	53	44	62	57	54	41	47		245.6	83	214.072
																5	53	75	52	48	47	57	60	66	49	5	54	3	271	6	128		48	70	47	43	42	52	55	61	44	49		268	122	314.66
																7	51	39	53	60	43	54	66	45	51	5	66	3	245	11	86		44	32	46	53	36	47	59	38	44	61		242	75	193.438
																1	51	54	51	71	48	47	60	74	38	8	54	4.8	282	5	95		50	53	50	70	47	46	59	73	37	46		277.2	90	232.126
																7	44	55	51	64	51	54	50	48	49	6	50	3.6	290	8	91		37	48	44	57	44	47	43	41	42	44		286.4	83	214.072
																4	53	54	45	58	49	61	50	58	39	6	71	3.6	255	0	82		49	50	41	54	45	57	46	54	35	65		251.4	82	211.493
																4	55	58	42	46	51	63	66	49	48	2	60	1.2	249	8	101		51	54	38	42	47	59	62	45	44	58		247.8	93	239.864
																6	52	60	49	65	45	50	52	40	48	4	54	2.4	262	3	94		46	54	43	59	39	44	46	34	42	50		259.6	91	234.705
																3	65	51	49	67	62	51	60	47	51	6	58	3.6	264	5	102		62	48	46	64	59	48	57	44	48	52		260.4	97	250.18
																2	67	59	51	68	53	55	58	56	52	6	67	3.6	293	7	99		65	57	49	66	51	53	56	54	50	61		289.4	92	237.284
																6	68	62	35	61	44	39	61	46	48	4	50	2.4	282	8	100		62	56	29	55	38	33	55	40	42	46		279.6	92	237.284
																4	61	43	43	63	53	51	54	44	40	7	51	4.2	276	8	92		57	39	39	59	49	47	50	40	36	44		271.8	84	216.651
																3	64	65	39	60	64	37	67	52	26	3	50	1.8	253	5	107		61	62	36	57	61	34	64	49	23	47		251.2	102	263.076
																7	63	52	53	60	51	55	53	67	47	5	54	3	269	8	98		56	45	46	53	44	48	46	60	40	49		266	90	232.126
																4	80	46	44	62	48	41	53	50	38	7	54	4.2	255	8	110		76	42	40	58	44	37	49	46	34	47		250.8	102	263.076
																6	69	43	50	67	59	47	61	44	39	3	66	1.8	275	5	102		63	37	44	61	53	41	55	38	33	63		273.2	97	250.18
																4	49	46	43	60	63	44	55	40	47	4	66	2.4	246	5	106		45	42	39	56	59	40	51	36	43	62		243.6	101	260.497
																4	59	49	49	54	52	37	49	42	42	5	61	3	287	4	114		55	45	45	50	48	33	45	38	38	56		284	110	283.71
																2	57	57	54	58	44	42	61	50	56	3	53	1.8	280	1	96		55	55	52	56	42	40	59	48	54	50		278.2	95	245.022
																5	60	62	41	68	54	46	40	57	44	4	65	2.4	250	2	116		55	57	36	63	49	41	35	52	39	61		247.6	114	294.026
																4	56	52	39	37	61	39	52	52	36	7	50	4.2	246	7	125		52	48	35	33	57	35	48	48	32	43		241.8	118	304.343
																8	66	50	49	53	42	47	58	61	42	4	65	2.4	246	2	104		58	42	41	45	34	39	50	53	34	61		243.6	102	263.076
																2	60	48	44	64	66	52	41	49	44	5	53	3	274	4	100		58	46	42	62	64	50	39	47	42	48		271	96	247.601
																2	57	58	46	49	42	35	63	35	43	3	58	1.8	273	3	113		55	56	44	47	40	33	61	33	41	55		271.2	110	283.71
																3	67	59	45	68	44	43	52	43	49	5	58	3	288	6	113		64	56	42	65	41	40	49	40	46	53		285	107	275.972
																5	56	43	62	66	53	40	66	49	41	3	49	1.8	266	7	117		51	38	57	61	48	35	61	44	36	46		264.2	110	283.71
																2	53	45	42	69	65	45	53	43	54	2	47	1.2	284	1	108		51	43	40	67	63	43	51	41	52	45		282.8	107	275.972
																6	57	61	46	55	48	51	51	46	47	4	60	2.4	244	4	86		51	55	40	49	42	45	45	40	41	56		241.6	82	211.493
																5	64	47	45	53	53	47	56	54	32	5	52	3	284	5	86		59	42	40	48	48	42	51	49	27	47		281	81	208.913
																5	57	66	49	56	63	53	47	59	43	5	60	3	281	5	86		52	61	44	51	58	48	42	54	38	55		278	81	208.913
																2	52	47	49	61	56	53	61	61	54	4	71	2.4	280	5	87		50	45	47	59	54	51	59	59	52	67		277.6	82	211.493
																6	57	60	37	56	64	46	46	50	55	5	55	3	257	4	107		51	54	31	50	58	40	40	44	49	50		254	103	265.655
																3	55	45	36	56	46	46	55	41	47	11	55	6.6	288	5	94		52	42	33	53	43	43	52	38	44	44		281.4	89	229.547
																3	71	48	45	60	38	56	61	41	36	4	48	2.4	259	4	89		68	45	42	57	35	53	58	38	33	44		256.6	85	219.23
																4	63	53	49	57	54	42	53	40	38	1	60	0.6	283	3	93		59	49	45	53	50	38	49	36	34	59		282.4	90	232.126
																8	54	54	39	58	44	50	48	47	48	5	42	3	288	3	103		46	46	31	50	36	42	40	39	40	37		285	100	257.918
																1	58	57	55	52	49	41	54	52	42	3	59	1.8	263	7	102		57	56	54	51	48	40	53	51	41	56		261.2	95	245.022
																7	61	61	53	57	45	46	66	40	46	6	51	3.6	296	6	104		54	54	46	50	38	39	59	33	39	45		292.4	98	252.759
																3	53	40	58	42	68	47	57	40	33	7	45	4.2	277	7	100		50	37	55	39	65	44	54	37	30	38		272.8	93	239.864
																5	62	52	48	62	54	54	59	44	45	7	58	4.2	264	7	127		57	47	43	57	49	49	54	39	40	51		259.8	120	309.501
																3	65	61	44	62	53	58	64	58	48	5	52	3	296	6	105		62	58	41	59	50	55	61	55	45	47		293	99	255.339
																4	55	45	48	55	40	39	52	48	48	4	45	2.4	308	4	102		51	41	44	51	36	35	48	44	44	41		305.6	98	252.759
																7	63	60	52	50	50	45	51	33	44	3	54	1.8	273	2	97		56	53	45	43	43	38	44	26	37	51		271.2	95	245.022
																3	61	51	44	62	60	58	52	61	36	5	50	3	263	4	119		58	48	41	59	57	55	49	58	33	45		260	115	296.606
																4	54	53	51	64	50	35	65	63	46	6	61	3.6	266	4	107		50	49	47	60	46	31	61	59	42	55		262.4	103	265.655
																4	54	49	52	55	52	48	59	54	42	2	48	1.2	239	4	93		50	45	48	51	48	44	55	50	38	46		237.8	89	229.547
																3	64	58	33	71	38	46	52	50	44	3	58	1.8	257	10	109		61	55	30	68	35	43	49	47	41	55		255.2	99	255.339
																4	48	40	44	49	49	41	66	58	39	5	50	3	256	5	106		44	36	40	45	45	37	62	54	35	45		253	101	260.497
																8	55	54	37	65	50	47	57	51	46	4	40	2.4	277	6	90		47	46	29	57	42	39	49	43	38	36		274.6	84	216.651
																2	64	38	49	53	46	38	51	54	50	2	53	1.2	266	3	108		62	36	47	51	44	36	49	52	48	51		264.8	105	270.814
																5	54	50	47	44	49	48	52	53	40	6	42	3.6	280	5	107		49	45	42	39	44	43	47	48	35	36		276.4	102	263.076
																5	61	48	59	55	42	48	49	33	39	6	67	3.6	250	5	84		56	43	54	50	37	43	44	28	34	61		246.4	79	203.755
																7	64	57	45	52	57	43	53	38	48	9	59	5.4	284	3	91		57	50	38	45	50	36	46	31	41	50		278.6	88	226.968
																7	56	64	45	42	67	59	59	49	38	6	45	3.6	289	3	95		49	57	38	35	60	52	52	42	31	39		285.4	92	237.284
																6	69	51	45	53	67	51	52	50	40	6	55	3.6	293	4	91		63	45	39	47	61	45	46	44	34	49		289.4	87	224.389
																5	54	55	44	50	62	47	52	43	46	8	58	4.8	298	7	92		49	50	39	45	57	42	47	38	41	50		293.2	85	219.23
																2	63	50	53	68	61	50	61	57	39	4	43	2.4	250	7	102		61	48	51	66	59	48	59	55	37	39		247.6	95	245.022
																1	66	50	48	48	60	54	50	44	35	2	43	1.2	282	7	122		65	49	47	47	59	53	49	43	34	41		280.8	115	296.606
																4	65	55	49	47	51	47	57	37	58	5	38	3	278	4	87		61	51	45	43	47	43	53	33	54	33		275	83	214.072
																3	60	52	51	45	49	45	59	52	36	4	32	2.4	277	1	95		57	49	48	42	46	42	56	49	33	28		274.6	94	242.443
																3	58	59	43	64	61	49	54	47	46	3	48	1.8	261	7	112		55	56	40	61	58	46	51	44	43	45		259.2	105	270.814
																3	55	62	48	54	59	57	60	52	43	1	67	0.6	274	4	73		52	59	45	51	56	54	57	49	40	66		273.4	69	177.963
																3	50	58	32	56	53	46	47	54	44	2	47	1.2	265	4	105		47	55	29	53	50	43	44	51	41	45		263.8	101	260.497
																6	43	55	40	75	49	45	48	38	44	8	44	4.8	283	4	105		37	49	34	69	43	39	42	32	38	36		278.2	101	260.497
																3	49	41	50	52	43	50	58	46	35	9	49	5.4	258	8	112		46	38	47	49	40	47	55	43	32	40		252.6	104	268.235
																5	65	51	40	44	57	43	65	45	53	6	47	3.6	246	3	94		60	46	35	39	52	38	60	40	48	41		242.4	91	234.705
																2	53	32	43	47	44	45	62	48	51	4	47	2.4	249	2	112		51	30	41	45	42	43	60	46	49	43		246.6	110	283.71
																3	58	63	52	56	40	44	50	47	42	3	46	1.8	280	7	112		55	60	49	53	37	41	47	44	39	43		278.2	105	270.814
																3	42	54	59	60	67	47	55	52	48	2	44	1.2	236	8	95		39	51	56	57	64	44	52	49	45	42		234.8	87	224.389
																5	45	50	48	63	48	42	57	44	53	4	49	2.4	278	3	96		40	45	43	58	43	37	52	39	48	45		275.6	93	239.864
																3	58	43	45	44	28	43	53	44	42	2	32	1.2	297	4	114		55	40	42	41	25	40	50	41	39	30		295.8	110	283.71
																4	57	52	50	53	49	40	62	54	48	4	42	2.4	297	3	91		53	48	46	49	45	36	58	50	44	38		294.6	88	226.968
																2	47	58	31	62	47	45	44	60	45	3	51	1.8	271	8	91		45	56	29	60	45	43	42	58	43	48		269.2	83	214.072
																4	51	53	49	50	39	40	67	49	48	2	47	1.2	250	3	97		47	49	45	46	35	36	63	45	44	45		248.8	94	242.443
																4	52	44	38	42	59	38	71	48	39	7	63	4.2	286	5	95		48	40	34	38	55	34	67	44	35	56		281.8	90	232.126
																1	47	40	44	60	42	58	37	42	36	3	54	1.8	259	4	115		46	39	43	59	41	57	36	41	35	51		257.2	111	286.289
																4	57	54	43	51	48	35	47	40	39	7	38	4.2	259	8	110		53	50	39	47	44	31	43	36	35	31		254.8	102	263.076
																4	67	48	44	57	52	47	54	49	55	3	51	1.8	249	1	106		63	44	40	53	48	43	50	45	51	48		247.2	105	270.814
																4	56	63	54	53	59	39	53	38	39	2	61	1.2	261	6	110		52	59	50	49	55	35	49	34	35	59		259.8	104	268.235
[truncated: 6,194 more rows]
[truncated: 29 more columns]
